# Supplementary material for: Adaptive evolution of the circadian gene timeout in insects
Source: PubMed Central journal article supplement — Sci Rep. 2014 Feb 27;4:4212. doi: 10.1038/srep04212 (PMC3936262; doi:10.1038/srep04212), 2014-02-27
Supplement: srep04212-s1.pdf [file srep04212-s1.pdf]

## Adaptive evolution of circadian gene *timeout* in insects

Hai-Feng Gu<sup>1,2</sup>, Jin-Hua Xiao<sup>1\*</sup>, Li-Ming Niu<sup>3</sup>, Bo Wang<sup>1</sup>, Guang-Chang Ma<sup>3</sup>, Derek W. Dunn<sup>4</sup>, Da-Wei Huang<sup>1,4\*</sup>

### Supplement materials

#### Sample preparation and experimental design

Field experiments to collect samples, the pollinator wasp species *Ceratosolenopsis* from *Ficus hispida* were demonstrated in Danzhou (19°52' N, 109°52' E), Hainan province, China from July to August 2012. Naturally growing figs were bagged with mesh bags from their very early developmental stages to protect from the interference of any insects including fig wasps. A mated female individual ('mother' wasp) was inoculated into each bagged fig for her to complete the process of oviposition. The developmental process of the offspring lasted for about 28 days. All the fig fruits were then collected at the same developmental stage several days before ripe and kept in dark condition. Two days later, figs were flash-frozen in liquid nitrogen every 3 hours (3:00, 6:00, 9:00, 12:00, 15:00, 18:00, 21:00, 24:00). Subsequently, we removed female and male pollinators from the syconia and immersed them into Sample Protector (TAKARA, China). In addition, to evaluate the effect of light stimulation on *timeout* expression, we performed another light treatment on adult female pollinators: females that had emerged from the syconia and exposed to natural light for 3 additional hours before flash-freezing. In total, 24 groups of fig wasps were collected.

#### RNA isolation and cDNA synthesis

For the 24 sampling regimes, total RNA of wasp samples were extracted using EasyPure<sup>TM</sup> RNA kit (TransGen Biotech, Beijing, China) and dissolved in RNase free water. Because fig pollinators are very small, we used 40 whole body individual wasps for each RNA sample. Genomic DNA was removed by treating with DNase I according to the manufacturer's instruction. A NanoDrop 2000 Spectrophotometer (Thermo, USA) was used to measure RNA purity and concentration. In total, 72 RNA samples (3 biological replicates for each group) with values of A260/A280 between 1.9 and 2.2 and an A260/A230 ratio of more than 2.0 were selected for

further experiments. The integrity of the RNA samples was evaluated by electrophoresis on 1.0% agarose gels stained with ethidiumbromide. Single strand cDNA was synthesized from 1µg total RNA with oligodT per 20µl reaction using TransScript II First Strand cDNA Synthesis SuperMix (TransGen Biotech, Beijing, China).

### **RT-qPCR expression analysis**

Previously, we amplified 9 housekeeping genes from *C.solmsi* that were frequently used as reference genes for qPCR studies in insects and systematically evaluated their expression stability. *RPL13a* and *UBC* were selected as the best reference genes for normalizing the RT-qPCR data<sup>1</sup>. Based on the coding sequences of *timeout* gene, one gene-specific primer pair was designed using Primer Premier 5.0<sup>2</sup>(Table S4). Amplification efficiencies and R<sup>2</sup> coefficients of the primer was determined with the slopes of the standard curves generated from plasmid standards. Product obtained via gene-specific primer was cloned with the PEASY-T3 cloning kit (TransGenBiotech, Beijing, China). Clones with appropriate insert size were verified by PCR and sequencing. Plasmids were prepared with EasyPure Plasmid MiniPrep Kit (TransGenBiotech, Beijing, China). We determined the amount of plasmids using a NanoDrop-2000 Spectrophotometer and calculated the copy numbers of the plasmids. Ten-fold serial dilutions to 10<sup>8</sup>, 10<sup>7</sup>, 10<sup>6</sup>, 10<sup>5</sup>, and 10<sup>4</sup> copies per 20µl RT-qPCR reaction were made for each plasmid with two technical replicates to generate standard curves. The formula  $E=10^{-1/\text{slope}}$  was used to calculate amplification efficiencies (Es), which reflected the efficacy of primer pair.

The Stratagene Mx3000p qPCR system (Stratagene, La Jolla, CA) was used to carry out RT-qPCR experiments. A 20 µl PCR mixture containing 1µl of template, 10 µl TransStart Green qPCRSuperMix UDG(2x) (TransGenBiotech, Beijing, China), 0.4 µl Passive Reference Dye II (50x) (TransGenBiotech, Beijing, China), 0.8 µl primer mix (0.2µM), and 7.8 µl sterile water was prepared. A template for no RT-control was prepared for each sample. All cDNA templates were stored at -20 °C. No-RT controls for all 72 samples were performed to check for gDNA contamination, and a no-template control was also conducted for each run to preclude reagent contamination. Melting curves were constructed for all runs to confirm amplification specificity. RT-qPCR reactions of all

genes for each sample were duplicated (technical replicates) to account for variation between runs. The same suite of thermal conditions was used for all RT-qPCR reactions: 50 °C for 2 min, 95 °C for 10 min, and then the following: 95 °C for 10 s, 54 °C for 15 s and 72 °C for 15 s for 40 cycles.

Several studies indicated that the mean of individual PCR efficiency ( $E_m$ ) gave more reliable results than a standard curve-derived efficiency<sup>3,4,5</sup>. Thus, we determined the baseline and calculated an  $E_m$  of individual reactions for primer pair from the raw RT-qPCR data using LinRegPCR<sup>6,7</sup>. Subsequently,  $C_q$  and  $E_m$  values were used to calculate the relative expression of *timeout* gene with respect to the reference genes *RPL13a* and *UBC* according to the following equation:

$$\frac{R_i}{R_{ref}} = \frac{(1 / (1 + E_{m_i})^{C_{q-i}})}{\sqrt{(1 / (1 + E_{m\_RPL13a})^{C_{q-RPL13a}})^2 + (1 / (1 + E_{m\_UBC})^{C_{q-UBC}})^2}}$$

$R_i/R_{ref}$  was the expression of each circadian gene normalized to the reference genes *RPL13a* and *UBC*.

## Data analysis

Statistical analysis was performed using SPSS v19 (SPSS Inc., Chicago, Ill). ANOVA analysis were used to determine the rhythmic expression.

## MIQE guidelines

Herein, we followed the Minimum Information for Publication of Quantitative Real-Time PCR Experiments (MIQE) guidelines<sup>8</sup> to increase the reliability and the integrity of the results and to promote the effort for experimental consistency and transparency between research laboratories. A MIQE checklist was provided in Table S5.

- 1 Wang, B., Xiao, J. H., Bian, S. N., Gu, H. F. & Huang, D. W. Adaptive evolution of vertebrate-type cryptochrome in the ancestors of Hymenoptera. *Biol. Lett.* **9**, 20120958 (2013).
- 2 Lalitha, S. Primer premier 5. *Biotech Software & Internet Report* **1**, 270-272 (2000).
- 3 Karlen, Y., McNair, A., Perseguers, S. b., Mazza, C. & Mermod, N. Statistical significance of

- quantitative PCR. *BMC bioinformatics***8**, 131 (2007).
- 4 Scheffe, J. H., Lehmann, K. E., Buschmann, I. R., Unger, T. & Funke-Kaiser, H. Quantitative real-time RT-PCR data analysis: current concepts and the novel "gene expression's CT difference" formula. *J. Mol. Med.***84**, 901-910 (2006).
- 5 Peirson, S. N., Butler, J. N. & Foster, R. G. Experimental validation of novel and conventional approaches to quantitative real-time PCR data analysis. *Nucleic Acids Res.***31**, e73-e73 (2003).
- 6 Ruijter, J. *et al.* Amplification efficiency: linking baseline and bias in the analysis of quantitative PCR data. *Nucleic Acids Res.***37**, e45-e45 (2009).
- 7 Ramakers, C., Ruijter, J. M., Deprez, R. H. L. & Moorman, A. F. Assumption-free analysis of quantitative real-time polymerase chain reaction (PCR) data. *Neurosci. Lett.***339**, 62-66 (2003).
- 8 Bustin, S. A. *et al.* The MIQE guidelines: minimum information for publication of quantitative real-time PCR experiments. *Clin. Chem.***55**, 611-622 (2009).

Fig.S1. The predicted secondary structure of fig wasp TIMEOUT and the mapped positive selection site

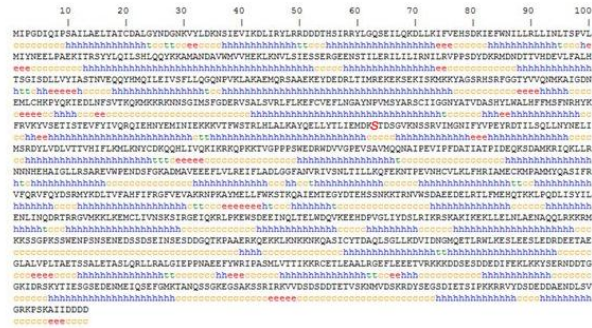

Notes: Alpha helix (h), Extended strand (e), Beta turn (t), Random coil (c). The red bold italic “S” in the Fig.S1 denotes the positive selection sites of fig wasp

Table S1. The exon and intron length of timeout gene in 25 Arthropod species

| Species name          | Exon-length (bp) | Intron-length (bp) |
|-----------------------|------------------|--------------------|
| <i>D.pulex</i>        | 3291             | 2187               |
| <i>T.urticae</i>      | 3162             | 0                  |
| <i>P.humanus</i>      | 2559             | 830                |
| <i>A.pisum</i>        | 3005             | 6354               |
| <i>T.castaneum</i>    | 3759             | 28630              |
| <i>N.longicornis</i>  | 3345             | 87177              |
| <i>N.vitripennis</i>  | 4119             | 86689              |
| <i>N.giraulti</i>     | 3351             | 87570              |
| <i>A.mellifera</i>    | 3966             | 175070             |
| <i>A.florea</i>       | 3933             | 184862             |
| <i>C.solmsi</i>       | 3642             | 243520             |
| <i>B.terrestris</i>   | 3951             | 245598             |
| <i>M.rotundata</i>    | 3951             | 308983             |
| <i>S.invicta</i>      | 3660             | 116936             |
| <i>A.cephalotes</i>   | 3507             | 106542             |
| <i>H.saltator</i>     | 2949             | 106179             |
| <i>P.barbatus</i>     | 3846             | 97847              |
| <i>A.echinator</i>    | 3717             | 97239              |
| <i>C.floridanus</i>   | 3780             | 93141              |
| <i>L.humile</i>       | 3987             | 91634              |
| <i>D.melanogaster</i> | 4152             | 70886              |
| <i>A.gambiae</i>      | 3462             | 962                |
| <i>B.mori</i>         | 3756             | 29258              |
| <i>H.melpomene</i>    | 4047             | 15419              |
| <i>D.plexippus</i>    | 3756             | 9423               |

Table S2. The positive sites were detected by both site-model and branch-site model

| Models           | P  | LnL           | Parameters       | Positive selected sites |
|------------------|----|---------------|------------------|-------------------------|
| <i>timeout</i> : |    |               |                  |                         |
| One-ratio        | 49 | -22027.490829 | $\omega=0.08332$ | None                    |

|                                     |    |               |                                                                                                                                                                        |                                                                                                                                                                                                                                                                                                                                          |
|-------------------------------------|----|---------------|------------------------------------------------------------------------------------------------------------------------------------------------------------------------|------------------------------------------------------------------------------------------------------------------------------------------------------------------------------------------------------------------------------------------------------------------------------------------------------------------------------------------|
| M1a                                 | 50 | -21904.067140 | p0=0.89689,p1=0.10311, ω0= 0.07136, ω1= 1.00000                                                                                                                        | N/A                                                                                                                                                                                                                                                                                                                                      |
| M2a                                 | 52 | -21904.067140 | p0= 0.89689,p1= 0.06118, p2= 0.04193, ω0= 0.07136, ω1= 1.00000, ω2= 1.00000                                                                                            | 1227 R 0.992**<br>1228 K 0.896<br>1233 H 0.996**<br>1235 D 0.546<br>1237 D 0.673<br>1256 D 0.519                                                                                                                                                                                                                                         |
| M7                                  | 50 | -21589.576840 | p= 1.09855 q= 9.82809                                                                                                                                                  | N/A                                                                                                                                                                                                                                                                                                                                      |
| M8                                  | 48 | -21579.792484 | p0=0.97883, p=1.20379, q=12.41352, p1= 0.02117, ω=1.10056                                                                                                              | 242 V 0.901                                                                                                                                                                                                                                                                                                                              |
| Branch-site a<br>(Hymenoptera)      | 52 | -21876.996311 | site class 0 1 2a 2b<br>proportion 0.78777 0.08997 0.10972 0.01253<br>background ω 0.07067 1.00000 0.07067 1.00000<br>foreground ω 0.07067 1.00000 263.97933 263.97933 | 24 L 0.998**<br>25 N 0.982*<br>49 L 0.997**<br>54 S 0.998**<br>70 M 0.943<br>87 K 0.984*<br>91 Q 0.996**<br>121 I 0.970*<br>217 K 0.993**<br>223 C 0.998**<br>236 H 0.969*<br>273 D 0.990*<br>288 K 0.978*<br>331 K 0.982*<br>363 F 0.986*<br>374 L 0.972*<br>390 K 0.993**<br>412 G 0.951*<br>414 I 0.946<br>437 N 0.916<br>443 Y 0.914 |
| Branch-site null a<br>(Hymenoptera) | 51 | -21887.791679 | site class 0 1 2a 2b<br>proportion 0.62728 0.21732 0.11541 0.03998<br>background ω 0.06873 1.00000 0.06873 1.00000<br>foreground ω 0.06873 1.00000 1.00000 1.00000     | N/A                                                                                                                                                                                                                                                                                                                                      |
| Branch-site b<br>(wasp)             | 52 | -21899.158781 | site class 0 1 2a 2b<br>proportion 0.86444 0.10162 0.03037 0.00357<br>background ω 0.07049 1.00000 0.07049 1.00000<br>foreground ω 0.07049 1.00000 5.53976 5.53976     | 222 I 0.905<br>283 I 0.946<br>417 K 0.937                                                                                                                                                                                                                                                                                                |
| Branch-site null b                  | 51 | -21904.067136 | site class 0 1 2a 2b                                                                                                                                                   | N/A                                                                                                                                                                                                                                                                                                                                      |

|                    |    |               |                     |         |         |                |          |              |
|--------------------|----|---------------|---------------------|---------|---------|----------------|----------|--------------|
| (wasp)             |    |               | proportion          | 0.86444 | 0.10162 | 0.03037        | 0.00357  |              |
|                    |    |               | background $\omega$ | 0.07049 | 1.00000 | 0.07049        | 1.00000  |              |
|                    |    |               | foreground $\omega$ | 0.07049 | 1.00000 | 5.53976        | 5.53976  |              |
| Branch-site c      | 52 | -21898.712653 | site class          | 0       | 1       | 2a             | 2b       | 45 S 0.970*  |
| (C.solmsi)         |    |               | proportion          | 0.88273 | 0.10062 | 0.01494        | 0.00170  |              |
|                    |    |               | background $\omega$ | 0.07007 | 1.00000 | 0.07007        | 1.00000  |              |
|                    |    |               | foreground $\omega$ | 0.07007 | 1.00000 | 7.03663        | 7.03663  |              |
| Branch-site c null | 51 | -21900.659340 | site class          | 0       | 1       | 2a             | 2b       | N/A          |
| (C.solmsi)         |    |               | proportion          | 0.85725 | 0.09795 | 0.04021        | 0.00459  |              |
|                    |    |               | background $\omega$ | 0.06933 | 1.00000 | 0.06933        | 1.00000  |              |
|                    |    |               | foreground $\omega$ | 0.06933 | 1.00000 | 1.000001.00000 |          |              |
| Branch-site d      | 52 | -21897.331343 | site class          | 0       | 1       | 2a             | 2b       | 101 E 0.941  |
| (bee)              |    |               | proportion          | 0.83796 | 0.09386 | 0.06131        | 0.00687  | 133 N 0.984* |
|                    |    |               | background $\omega$ | 0.06874 | 1.00000 | 0.06874        | 1.00000  |              |
|                    |    |               | foreground $\omega$ | 0.06874 | 1.00000 | 3.20212        | 3.20212  |              |
| Branch-site null d | 51 | -21898.590073 | site class          | 0       | 1       | 2a             | 2b       | N/A          |
| (bee)              |    |               | proportion          | 0.79208 | 0.09020 | 0.10569        | 0.01204  |              |
|                    |    |               | background $\omega$ | 0.06855 | 1.00000 | 0.06855        | 1.00000  |              |
|                    |    |               | foreground $\omega$ | 0.06855 | 1.00000 | 1.000001.00000 |          |              |
| Branch-site e      | 52 | -21902.685822 | site class          | 0       | 1       | 2a             | 2b       | 126 K 0.957* |
| (ant)              |    |               | proportion          | 0.89282 | 0.10291 | 0.00384        | 0.00044  |              |
|                    |    |               | background $\omega$ | 0.07092 | 1.00000 | 0.07092        | 1.00000  |              |
|                    |    |               | foreground $\omega$ | 0.07092 | 1.00000 | 14.25637       | 14.25637 |              |
| Branch-site e null | 51 | -21903.380044 | site class          | 0       | 1       | 2a             | 2b       | N/A          |
| (ant)              |    |               | proportion          | 0.87226 | 0.10037 | 0.02454        | 0.00282  |              |
|                    |    |               | background $\omega$ | 0.07068 | 1.00000 | 0.07068        | 1.00000  |              |
|                    |    |               | foreground $\omega$ | 0.07068 | 1.00000 | 1.000001.00000 |          |              |
| Branch-site f      | 52 | -21886.423459 | site class          | 0       | 1       | 2a             | 2b       | 10 N 0.993** |
| (T.castaneum)      |    |               | proportion          | 0.80201 | 0.08719 | 0.09994        | 0.01086  | 111 V 0.963* |
|                    |    |               | background $\omega$ | 0.07156 | 1.00000 | 0.07156        | 1.00000  | 163 S 0.958* |
|                    |    |               | foreground $\omega$ | 0.07156 | 1.00000 | 17.82236       | 17.82236 | 226 L 0.950* |
|                    |    |               |                     |         |         |                |          | 255 P 0.961* |
|                    |    |               |                     |         |         |                |          | 276 S 0.912  |
|                    |    |               |                     |         |         |                |          | 303 L 0.985* |
|                    |    |               |                     |         |         |                |          | 306 W 0.943  |
|                    |    |               |                     |         |         |                |          | 363 F 0.929  |
|                    |    |               |                     |         |         |                |          | 392 N 0.970* |
|                    |    |               |                     |         |         |                |          | 416 N 0.968* |
|                    |    |               |                     |         |         |                |          | 426 S 0.965* |
| Branch-site null f | 51 | -21891.193737 | site class          | 0       | 1       | 2a             | 2b       | N/A          |
| (T.castaneum)      |    |               | proportion          | 0.79938 | 0.08740 | 0.10206        | 0.01116  |              |





|                    |    |               |                     |         |         |         |         |     |               |
|--------------------|----|---------------|---------------------|---------|---------|---------|---------|-----|---------------|
|                    |    |               |                     |         |         |         |         |     | 240 C 0.998** |
|                    |    |               |                     |         |         |         |         |     | 279 N 0.949   |
|                    |    |               |                     |         |         |         |         |     | 306 W 0.942   |
|                    |    |               |                     |         |         |         |         |     | 327 K 0.915   |
|                    |    |               |                     |         |         |         |         |     | 395 D 0.953*  |
|                    |    |               |                     |         |         |         |         |     | 406 G 0.997** |
| Branch-site null i | 51 | -21894.675893 | site class          | 0       | 1       | 2a      | 2b      | N/A |               |
| (Diptera)          |    |               | proportion          | 0.76123 | 0.08697 | 0.13624 | 0.01557 |     |               |
|                    |    |               | background $\omega$ | 0.07012 | 1.00000 | 0.07012 | 1.00000 |     |               |
|                    |    |               | foreground $\omega$ | 0.07012 | 1.00000 | 1.00000 | 1.00000 |     |               |
| Timeless full:     |    |               |                     |         |         |         |         |     |               |
| <i>one-ratio</i>   | 15 | -9918.024838  | $\omega = 0.00925$  |         |         |         |         | N/A |               |

Table S3. Accession numbers of genes in this study

| Gene           | Species                      | Accession number                                                                                                                                                                                                                                                                                                                                                                                                                                                          |
|----------------|------------------------------|---------------------------------------------------------------------------------------------------------------------------------------------------------------------------------------------------------------------------------------------------------------------------------------------------------------------------------------------------------------------------------------------------------------------------------------------------------------------------|
| <i>timeout</i> | <i>Daphnia pulex</i>         | EFX80319                                                                                                                                                                                                                                                                                                                                                                                                                                                                  |
|                | <i>Apis flora</i>            | GL576581:3114281-3114507,3114593-3114697,3114842-3114991,3115222-3115317,3115459-3115473,3116217-3116423,3118873-3119007,3119909-3120008, 3127972-3128069,3128777-3129014,3129212-3129410,3129478-3129568,3129671-3129754,3284494-3284591,3290746-3290826,3290914-3291073,3291141-3291274,3292294-3292448,3292528-3292660,3293076-3293338,3294327-3294444,3295396-3295559,3295702-3295797,3295878-3296009,3296088-3296219,3296347-3296504,3296629-3296715,3303068-3303074 |
|                | <i>Apis mellifera</i>        | XM_003250605                                                                                                                                                                                                                                                                                                                                                                                                                                                              |
|                | <i>Bombus terrestris</i>     | XM_003394988                                                                                                                                                                                                                                                                                                                                                                                                                                                              |
|                | <i>Megachile rotundata</i>   | XM_003707786                                                                                                                                                                                                                                                                                                                                                                                                                                                              |
|                | <i>Acromyrmex echinatior</i> | GL888331.1:409386-409490,411219-411388,412522-412623,412683-412967,413507-413731,415827-415961,417164-417263,419508-419608,419891-420128,420447-420645,421071-421167,97520-497617,503636-503716,503829-503979,504072-504205,505221-505375,505450-505582,506232-506494,506766-506883,508941-509104,509279-509374,509464-509595,509663-509843,510011-510164,510247-510346.                                                                                                  |
|                | <i>Atta cephalotes</i>       | GL377341.1:1081473-1081572,1081654-1081807,1081981-1082140,1082215-1082346,1082436-1082531,1082692-1082855,1085548-1085665,1085931-1086193,1087724-1087856,1087931-1088085,1089191-1089324,1089414-1089561,1089685-1089765,1096032-1096129,1180152-1180242,1180667-1180865,1181206-1181443,1181729-1181829,1186005-1186104,1187312-1187446,1189569-1189793,1190336-1190620,1191329-1191525.                                                                               |
|                | <i>Harpegnathos saltator</i> | GL450313.1:612-729,919-1181,1726-1858,1939-2093,3217-3350,3478-3628,3792-3872,9306-9403,98878-98977,99639-99837,100227-100464,100799-100899,103459-103558,104810-104944,107236-107460,108193-108477,108565-108678,109326-109421,109516-109                                                                                                                                                                                                                                |

---

739.

*Linepithemahumile* GL905240:2802119-2802333,2802423-2802518,2802755-2802879,2803183-2803291,2803360-2803644,2804233-2804454,2806458-2806592,2807799-2807898,2810281-2810381,2810678-2810915,2811279-2811477,2811772-2811865,2886173-2886270,2891758-2891838,2891950-2892106,2892188-2892321,2893206-2893360,2893436-2893568,2894276-2894538,2894660-2894777,2896439-2896602,2896734-2896829,2896912-2897043,2897112-2897554,2897650-2897743.

*Camponotusfloridanus* GL437108.1:885907-886000,886088-886241,886336-886516,886820-886951,887047-887142,887285-887448,889294-889411,889573-889835,890490-890622,890702-890856,891751-891884,891969-892122,892300-892380,897938-898035,972789-972864,973212-973410,973751-973988,974295-974395,976738-976837,978080-978214,980344-980571,981176-981460,982085-982225,982422-982514,982600-982826.

*Pogonomyrmexbarbatus* GL738581.1:401072-401165,401267-401420,401932-402112,402178-402309,402587-402682,402825-402988,404561-404678,404851-405113,405741-405873,405955-406109,407134-407267,407346-407499,407582-407662,413539-413636,492725-492821,493149-493347,493706-493943,494291-494391,496756-496855,498132-498266,500415-500654,501235-501519,501592-501702,502023-502184,502543-502763.

*Solenopsisinvicta* GL771866.1:3436772-3436865,3436949-3437102,3437802-3437982,3438049-3438180,3438948-3439043,3439214-3439377,3445627-3445744,3445885-3446147,3446819-3446951,3447023-3447177,3448142-3448275,3448365-3448515,3448630-3448710,3454362-3454459,3544716-3544803,3545118-3545316,3547010-3547247,3547586-3547686,3551260-3551359,3552569-3552703,3555133-3555363,3555911-3556195,3556267-3556368,3557141-3557367.

*Nasoniavitripennis* XM\_001604940

*Nasoniagiraulti* GL27420.1:2574577-2574691,2574785-2575119,2575191-2575322,2575404-2575499,2575577-2575740,2577243-2577360,2578450-2578709,2579136-2579268,2579343-2579497,2580064-2580182,2580781-2580949,2582037-2582117,2592845-2592942,2659148-2659238,2659307-2659505,2659824-2660058,2660474-2660574,2663605-2663806,2664005-2664391,2665336-2665496.

*Nasonialongicornis* GL277971.1:2573864-2573978,2574072-2574406,2574478-2574609,2574691-2574786,2574864-2575027,2576514-2576631,2577719-2577978,2578406-2578538,2578613-2578761,2579332-2579450,2580043-2580211,2581297-2581377,2592211-2592308,2658004-2658094,2658163-2658361,2658681-2658915,2659365-2659465,2662493-2662694,2662893-2663279,2664224-2664384.

*Ceratosolenolsmsi* Scaffold28:  
22699-22850,22950-23138,23816-23911,24825-25106,25990-26199,29033-29164,29284-29383,32077-32177,33157-33394,34243-34441,213353-213450,255828-255908,258229-258364,259527-259645,260638-260792,261012-261144,261816-262075,265854-265971,268368-268531,268611-268706,269420-269551,269619-269799,269874-270027,270115-270229.

*Triboliumcastaneum* XM\_966106

---

|                 |                                |                                                                                         |
|-----------------|--------------------------------|-----------------------------------------------------------------------------------------|
|                 | <i>Anopheles gambiae</i>       | XM_001689077                                                                            |
|                 | <i>Drosophila melanogaster</i> | NM_079617                                                                               |
|                 | <i>Danausplexippus</i>         | EHI76705                                                                                |
|                 | <i>Heliconiusmelpomene</i>     | HMEL004152 from the <a href="http://butterflygenome.org">http://butterflygenome.org</a> |
|                 | <i>Bombyxmori</i>              | XM_004925146                                                                            |
|                 | <i>Pediculushumanus</i>        | XM_002425891                                                                            |
|                 | <i>Tetranychusurticae</i>      | HE:587316:540554-537390                                                                 |
| <i>timeless</i> | <i>Daphnia pulex</i>           | DappuT313767 from the <i>Daphnia pulex</i> genome                                       |
|                 | <i>Danausplexippus</i>         | AY367059                                                                                |
|                 | <i>Bombyxmori</i>              | NM_001044157                                                                            |
|                 | <i>Pediculushumanus</i>        | XM_002432376                                                                            |
|                 | <i>Tetranychusurticae</i>      | Tetur27g02370 from the <i>Tetranychusurticae</i> genome                                 |
|                 | <i>Drosophila melanogaster</i> | NM_164540                                                                               |
|                 | <i>Triboliumcastaneum</i>      | NM_001113465                                                                            |
|                 | <i>Acyrtosiphonpisum</i>       | XM_003240268                                                                            |

Table S4. The primer used for real time qPCR

| Gene           | Forward primer (5'-3') | Reverse primer (5'-3') | Amplicon length (bp) | PCR Efficiency (%) | R <sup>2</sup> |
|----------------|------------------------|------------------------|----------------------|--------------------|----------------|
| <i>timeout</i> | AGAGGATGAGAATATGGAA    | GGAGTCTGAATCTACAAC     | 117                  | 93.4               | 0.997          |

Table S5. MIQE checklist

| Item to check                                 | Importance | Details                                                                                                                                                                         |
|-----------------------------------------------|------------|---------------------------------------------------------------------------------------------------------------------------------------------------------------------------------|
| <b>Sample</b>                                 |            |                                                                                                                                                                                 |
| <b>Description</b>                            | E          | Pollinators ( <i>Ceratosolenolsimarchali</i> ) of <i>Ficushispida</i>                                                                                                           |
| <b>Processing procedure</b>                   | E          | Adult female and male fig pollinators were collected from inside the fig syconia, in addition, we collect the adult female from the outside the fig syconia in light condition. |
| <b>If frozen, how and how quickly</b>         | E          | Insect samples were immediately frozen in liquid nitrogen after they were collected                                                                                             |
| <b>If fixed, with what and how quickly?</b>   | E          | Stored in sample Protector (TAKARA, China) immediately after frozen                                                                                                             |
| <b>Sample storage conditions and duration</b> | E          | Samples were held at -20 °C for less than a week before RNA isolation                                                                                                           |
| <b>Experimental design</b>                    |            |                                                                                                                                                                                 |
| <b>Definition of experimental and control</b> | E          | No relative quantification were involved in this work, thus no                                                                                                                  |

|                                                                      |   |                                                                                                                                                                                                                                                                                                                                                                                                                                                                                                                    |
|----------------------------------------------------------------------|---|--------------------------------------------------------------------------------------------------------------------------------------------------------------------------------------------------------------------------------------------------------------------------------------------------------------------------------------------------------------------------------------------------------------------------------------------------------------------------------------------------------------------|
| <b>groups</b>                                                        |   | control groups were defined                                                                                                                                                                                                                                                                                                                                                                                                                                                                                        |
| <b>Number within each group</b>                                      | E | 3                                                                                                                                                                                                                                                                                                                                                                                                                                                                                                                  |
| <b>Nucleic acid extraction</b>                                       |   |                                                                                                                                                                                                                                                                                                                                                                                                                                                                                                                    |
| <b>Procedure and/or instrumentation</b>                              | E | For each RNA sample, total RNA of 40 individuals was extracted by using an EasyPure™ RNA kit (TransGen Biotech, China)                                                                                                                                                                                                                                                                                                                                                                                             |
| <b>Name of kit and details of any modifications</b>                  | E | EasyPure™ RNA kit (TransGen Biotech, China). We exactly followed the protocols of the kit                                                                                                                                                                                                                                                                                                                                                                                                                          |
| <b>Details of DNase or RNase treatment</b>                           | E | Genomic DNA was removed by treating with DNase I according to the standard protocols                                                                                                                                                                                                                                                                                                                                                                                                                               |
| <b>Contamination assessment (DNA or RNA)</b>                         | E | No reverse transcription control (NRC) was performed for each RNA sample to assess the absence of DNA.                                                                                                                                                                                                                                                                                                                                                                                                             |
| <b>Nucleic acid quantification</b>                                   | E | RNA concentration was determined by measuring the absorbance at 260nm UV light                                                                                                                                                                                                                                                                                                                                                                                                                                     |
| <b>Instrument and method</b>                                         | E | NanoDrop-2000 Spectrophotometer (Thermo, USA)                                                                                                                                                                                                                                                                                                                                                                                                                                                                      |
| <b>RNA integrity: method/instrument</b>                              | E | RNA integrity was assessed by electrophoresis on 1.0% agarose gels stained with ethidium bromide                                                                                                                                                                                                                                                                                                                                                                                                                   |
| <b>RIN/RQI or C<sub>q</sub> OF 3' and 5' transcripts</b>             | E | N/A                                                                                                                                                                                                                                                                                                                                                                                                                                                                                                                |
| <b>Inhibition testing (C<sub>q</sub> dilutions, spike, or other)</b> | E | Standard curve analyses were sufficient to test inhibition                                                                                                                                                                                                                                                                                                                                                                                                                                                         |
| <b>Reverse transcription</b>                                         |   |                                                                                                                                                                                                                                                                                                                                                                                                                                                                                                                    |
| <b>Complete reaction conditions</b>                                  | E | TransScript II First-Strand cDNA Synthesis SuperMix (TransGen Biotech, China) was used to generate single-stranded cDNA total RNA with oligo-dT. For each sample, a template for no reverse transcription-control was prepared.                                                                                                                                                                                                                                                                                    |
| <b>Amount of RNA and reaction volume</b>                             | E | Amount of RNA: 1 µg; Reaction volume: 20 µl                                                                                                                                                                                                                                                                                                                                                                                                                                                                        |
| <b>Priming oligonucleotide and concentration</b>                     | E | oligo-dT: 2 µM                                                                                                                                                                                                                                                                                                                                                                                                                                                                                                     |
| <b>Temperature and time</b>                                          | E | 50 °C for 1 hour                                                                                                                                                                                                                                                                                                                                                                                                                                                                                                   |
| <b>qPCR protocol</b>                                                 |   |                                                                                                                                                                                                                                                                                                                                                                                                                                                                                                                    |
| <b>Complete reaction conditions</b>                                  | E | PCR reactions were performed in a Mx3000P Real Time Thermocycler (Stratagene, USA). A 20 µl PCR mixture was prepared containing 1 µl of template, 10 µl TransStart Green qPCRSuperMixUDG(2x) (TransGen Biotech, China), 0.4 µl Passive Reference Dye II(50x) (TransGen, China), 0.8 µl primer mix(0.2 µM), and 7.8 µl sterile water. The following thermal conditions for RT-qPCR were used: 50°C for 2 min, 95°C for 10 min, and then the following: 95°C for 10 s, 54°C for 15 s and 72°C for 15 s for 40 cycles |
| <b>Reaction volume and amount of cDNA/DNA</b>                        | E | Reaction volume: 20 µl; amount of cDNA: 1 µl per reaction volume                                                                                                                                                                                                                                                                                                                                                                                                                                                   |

|                                                                  |   |                                                                                                                                                  |
|------------------------------------------------------------------|---|--------------------------------------------------------------------------------------------------------------------------------------------------|
| <b>Primer, (probe), Mg<sup>2+</sup>, and dNTP concentrations</b> | E | 500nM primers; 3mM MgCl <sub>2</sub> ; 0.2 mMdNTP                                                                                                |
| <b>Polymerase identity and concentration</b>                     | E | TransStart Green qPCRSuperMix UDG (2x) (TransGen Biotech, China)                                                                                 |
| <b>Buffer/kit identity and manufacturer</b>                      | E | TransStart Green qPCRSuperMix UDG (2x) (TransGen Biotech, China)                                                                                 |
| <b>Additives (SYBR Green I, DMSO, and so forth)</b>              | E | Passive Reference Dye II(50x) (TransGen Biotech, China)                                                                                          |
| <b>Complete thermocycling parameters</b>                         | E | 50°C for 2 min, 95°C for 10 min, and then the following: 95°C for 10 s, 54°C for 15 s and 72°C for 15 s for 40 cycles                            |
| <b>Specificity (gel, sequence, melt, or digest)</b>              | E | Melting curve analysis, gel electrophoresis and sequencing                                                                                       |
| <b>For SYBR Green I, C<sub>q</sub> of the NTC</b>                | E | The signal of the amplification plot was late (C <sub>q</sub> >30), difference of C <sub>q</sub> between NTC controls and cDNA samples was large |
| <b>Calibration curves with slope and y intercept</b>             | E | -3.58~-3.10                                                                                                                                      |
| <b>PCR efficiency calculated from slope</b>                      | E | Table S4 of Paper                                                                                                                                |
| <b>R<sup>2</sup> of calibration curve</b>                        | E | Table S4 of paper                                                                                                                                |
| <b>Linear dynamic range</b>                                      | E |                                                                                                                                                  |
| <b>C<sub>q</sub>variation at LOD</b>                             | E |                                                                                                                                                  |
| <b>Evidence for LOD</b>                                          | E | C <sub>q</sub> <35 for all samples                                                                                                               |
| <b>If multiplex efficiency and LOD OF each assay</b>             | E | N/A                                                                                                                                              |
| <b>qPCR analysis analysis program (source, version)</b>          | E | MxPro QPCR Software                                                                                                                              |
| <b>Method of C<sub>q</sub> determination</b>                     | E | C <sub>q</sub> values were determined using threshold, which is determined using the Amplification-based Threshold method                        |
| <b>Outlier identification and disposition</b>                    | E | None of C <sub>q</sub> values was discarded                                                                                                      |
| <b>Results for NTCs</b>                                          | E | The signal of the amplification plot was very late (C <sub>q</sub> >35)                                                                          |
| <b>Justification of number and choice of reference genes</b>     | E | <i>UBC</i> ; <i>RPL13a</i>                                                                                                                       |
| <b>Description of normalization method</b>                       | E | N/A                                                                                                                                              |
| <b>Number and stage (RT or qPCR) OF technical replicates</b>     | E | Duplicate                                                                                                                                        |
| <b>Number and concordance of biological replicates</b>           | E | Triplicate                                                                                                                                       |
| <b>Repeatability (intraassay variation)</b>                      | E | ΔC <sub>q</sub> < 0.5 for all duplicates                                                                                                         |
| <b>Statistical methods for results significance</b>              | E | One way ANOVA                                                                                                                                    |
| <b>Software (source, version)</b>                                | E | SPSS v19                                                                                                                                         |
| <b>qPCR target information</b>                                   |   |                                                                                                                                                  |

|                                                                  |   |                                                   |
|------------------------------------------------------------------|---|---------------------------------------------------|
| <b>Gene symbol</b>                                               | E | Text                                              |
| <b>Sequence accession number</b>                                 | E |                                                   |
| <b>Amplicon length</b>                                           | E | Table S4 of paper                                 |
| <b>In silico specificity screen (BLAST, and so on)</b>           | E |                                                   |
| <b>Location of each primer by exon or intron (if applicable)</b> | E | Primers were designed spanning the splicing sites |
| <b>What splice variants are targeted</b>                         | E | N/A                                               |

supplement file2\_before\_delet\_gap

>Pediculus\_humanus

```

AATTTCAAATCAACTTTTGTATTCAAATATAAAATCGATTTCAAATTTAGATTTTCGTT
TCTCATAAATCTTTAAACAAC-----
-----
-----
-----
-----
-----
-----
-----TTGGAG
GATTTGGCTTATCTGACACTTTTGGAAATTTTACATTGGATGGATTGTTCCAAGAAA---
CCTTTGGTTCGAGCATTGTGAGAGAAATAAAATCTGATTTATTTTACGTTATGGAATAT
AGAGAAATGACATTAAGTTTATTCATGAAATTCGAAGCCAATAAATTTTCCATAACATAT
TTGAAAACGCTCATTCAAACGGCACATTTATTTATCAAACCTTCTTGAAGAATTTTCAAAA
AGTTCT-----AAATTGATTGTGCAAAAGATTTCAAAGTCAGAAAAAAAAAGAAAAGGA
AAAAAGTCGAAAGTGGAAAAAATAAT-----ATTCCGATTAATAAGAA
CAAATTTGGGAAAAAATTTGTGATGATTTACAAAACCTTAATGGCA-----TCCGAT
ACGCCA-----ATACCCGACATATCACCTTTGATGCCACTTTGGATACTCCAATA
GAGGAACAAAAGAAAGAGCGATGAAAAATATTCAAATCTCTACATCTTAGAAATATT
AACGAAGCTCTTGGATTATTCAGGAGTTCTAGGCAAGTGTGGCCG-----GAAAATGAT
TGTTTTGGTAACGAAAATATGACGATCGAAGAGGAATTATCTGCCCTTAAAGAAATTTGC
CTGCCGATTTATTAATGAAGATAATGTAATTGAAAATAATAAGCCCCCAGTTTCAGAA
GAAGAA-----
-----GAAGACGACGACGACGACAACAACACGGGAATAGTAGCGATAGTGAT
GAAGCACCCATAAAGATAACAGAACAAGATTTTAACATGCAGGATTTTAAAAGACGGTTG
GTACATAAAAAGGTAGTTGAAATATGTGGCCTTTTATTGAAAAATTACAAAATAAATTCT
GATCACGTCAATCATTGTGCAGTTAACTCCTTCATCGAATAGGTTGGGATTGTAATATG
CCTGCCATGCTTTATCAAGCATCTTTGTTTCAAACCTTTATTAATATCATGAATGATAAA
CACCGA-----AATTACAGTGAAATGAATACGTTACGATAAATTTATTTCAA

```

AAGTTTCGAAAACATGCCAGCGAAAACAGTATA-----GTTTTTTTGGAA  
TTATTGTTTTGGAAAGATTATCCGTTGCATTAGAAATTCAAATAAATATGTCGATTAC  
GGAGGA-----GAAACAATGACAGGAACCAAGGGAAAAAGGTCT  
AAAAAAAAAATTAAAGACGGATGAAAACAGT-----  
-----AAATCAAAGAAAAAAGTAAGAAGAAAATGGAA  
GAGGAAGAAAGTTTTCCGACTGGTTTAGAAATTCCTGATACAGAACTTGAGGGG-----

-----  
-----  
-----

-----GGGCCT  
ACAGATGTCGAATTAGAA-----  
-----

-----TCAAATGACCCTCAAAAAGAAATTTTTGAAATGGATTTCG  
TTGAAAACAGGAGATTCACCTTTTCAAAGAGGAAAATTTTATTGAAAATGATATTTAATC  
AAAGAGAAAATCAACGATTTTGATGATATTTTACCC-----GTT  
AAAAATGGAACGGAAATAGATGGTACCCATAGTGATGGTACCCATAGTGATGATGGTTCG  
ATTAATAATAAATTTGATGACAAGATAATTTTTAAATCTAAAAAAGAAGAAGGTTGATA  
TCGTCCGATGATTCAAATTCCTGATGGTAAAAATTATGTGGAA

>Tetranychus\_urticae

TTCAAGGATTCAACTTATCTAGTGAAAAATTTCAAATCTGTTGGTAAAAATGATTTGATT  
TATCATAAAACCACTGAAGACCCTCGTAAAATTAGTATGGACATTGAAAAAGCT---GGA  
ACAAAGAAACCAAAAAATCGTGCACCTATGCAAGATGATTGTTCTGTTGAGTATAATAAT  
ATTGGAATCACATTTTCGTCCATCCATAAAAGTACGGAACTTTTGAAGAATTCTGT  
TCAAATTTGTGAAAGAATCCTACAATTCCTTATGGCATACTTAAAAGCGCATTGGAA  
AACAAAAAT---GCTATAGCAAAT-----GATGAAACATATTACTTTTTTCACCGCACAT  
TTTTTCATGGAATTCATCGACTCT---AAAGGAGATCCAAGTGATATCGAAGAACT  
TTCAATACTGAATATTTCCACTATTTGCACACCAAAGTTGAAGAATTTATGGATCAGATT  
GCGAACGCTCGATCTGACAGAGTCAGTATAACGGCTTGGTCTAGAAGACTTCACATTGCT  
CTAAAAGCATACAAAGAGCTTCTTTTACAATTGCCTCGATCAAACATGCACAAGAA---  
GAGCGACTGTTGTATCTTGCTAAAACCATGAGTGACAAAGTATTCTATGAACTCGACTAC  
CGTGAACTACTGCTGAATCTAATTTCTGGTTATGATGAAAAAAGATGAGCCACAATTT  
CTGCGAGATTTGATTGAAACAAATCACGTCTTCCTCAAATGTTAGATCTTTACAGTAAG  
TCGAATGAAAATTTTCGTGGTCAAGACAAAAAAGAAAAACGCAGGAAGCCGACTGCTAAG  
AAAAAAAAGGAACAACAA-----ATGGAAGTACTAGTCGAA  
AAATTATGGCAAGAAATAGTCTTTGAATTGGACGAGGCTATTCAAGGGAAGACTGAATTA  
CCAAATCCAGATAATGAGGTGGAAGTTCTTTCTTTTAAATGTTTTGTCTGAAGAGACTAGA  
GATGCCAGAAAGAAGATGCCTTGTATCGAATAAGCAAATTTTTAAAACAAAGAAAAATT  
TTACTCGCTTTAGCACTTTGTAGAAATGCACGAGAAGAATACAACGATTACGACGATACA  
CCTTTTGGAGCTCCAGACTTATCTCCTGAAGAGGAAGTAGCTATTTTGCACAGAATTATC  
GCTACTGAAAAGTGGATTGATCTAGATATGGAAGAACCAATCGAGAAAAATGGCAAAGAA  
AATGCTGTTGCTGATGAAAACATTGCTGAAAATCAGAATGAAGAAGAATTGGCTGATAAA

GAAAAAGATCCAGTATCAGATTACGAAGAGGAGAAAGACGGTGAAAATAATGGAGTAGTA  
AACGATGAATCTGCTTATCAAGAGCGAGCATTTTATCTTCGAGATTCGTTTTGAAATAC  
TGTAATTCAAAGGTCGTAAGCTTATTGCTTAGCGTTGAAAAAATTCGATATAAATTCG  
GAAATACTTAATCATGCGATACTTCGAATGGCTCACAGAATTGCCTTGGACTGTAAATCT  
CCTGTTTTCTTCTCCAGCTTTCAGTTTTCAGGATATTTCAAAGATGCTTTGAAATAAGC  
AAGTTAGATAGAGACAATAAATTCTCAGAAATAAGGAATTTTGCAAGATTCATAATCAAA  
GAGTTTGTAGTCAAGCTAAAGGTAACGATAAA-----CTTTTAGTGGAA  
ATTCTATTCTGGAAAAATAAGAAAGAAATGCATGAAATTGAAGAGAATTATGTTAAACCT  
GAACCAAAAGAGCGAAAACGCAAAGAGAAGAAAGGAAGGAAAGGAAAGAAAGGTGAAGA  
T

GATGCCATTAACTCAACTTATGATTCCGAC-----TCGGGAGATGACCGCCTGGTAAT  
CGAAATGATGATCTATCTGAGTTATCAGATGACGCAGATGAATTTAATCCCAAATTC  
AGCACGCAAATTCAAAAGTTCCT-----

-----  
-----  
-----  
-----  
-----  
-----

-----GAAGAAAAGTCAAATCTCCTGATGCGTCCGTTGCTGAAAAT  
AATCCTACCATTATGATGAAGTCATTGATGTAAATTATGAAGAGCTTCAAGATCAACCT  
GGATCACTCAATCCTTATGATCTCGAAGATGATGAT-----CTTATTGATATG  
GACGAAGTAATTAATCAAGTTGCAGCCGATGATGACAGTCTTGACAATGATTTTGAAAAT  
GATGTAAATAATGAGAATTCTATAATAGGAGCAACCCAAAATGATTTAGCTGATGATTTA  
AGTGATGCTGAAACCATTGACGGTGAAGTTATTATTTCCAAG

>Acromyrmex\_echinator

CGATTTCGGCGTACTTACGTGCGTGCAAAATATGAAAGCTATCGGAGAAAATCAAATGATA  
TGCCATAAACCGTATCAAAAAATCGAAGCAGTGGAAATTTGGTCACGATAAGAAA---AGA  
GTGAAGCGACGCAGAGATAAAATGAGCCTGCAAGATGCCAAG-----  
-----GAAGAGCGCACGTCTGTCTCAGCGTACGGCTCTTTCTAAAAGAATTTTGT  
GTAGAATTTTTAAGCGGAGCTTACAACCCCGTGATGAAATTCACTCGATCTTGCTTCATC  
AATGATCCTCATGGCCAAGCAGTA-----GAAGCAGCTGTCTATCTGTGGGCTTTACGT  
TTTTTCATGGAGTTCAATCGACATTAC---AAGTTTCAAGTGAATATGTAAGCGAACT  
ATATCTACAGAAGTGTTTTATTAGTGCAAAGACAAATGGACCAATATTATGAGATGATA  
ATA-----GTTGATAAAAAAAAAAATACCACTTTGGTCTCGTAGATTACATTTGGCA  
TTAAAGGCGTATCAGGAACCTCTTAACACTCTTATGGCAATGGATAAGAATAGCGAT---  
GATGGTGTAGGGAATCTAGCAAGATAATTAAGCAATATCTTTTATGTCCCGGAATAT  
CGGAAACGATACTCTCTCAGCTTTTGTGCTTCGATGAAGTTAAAATGTCACGGCAGTAC  
TTAGTGGATCTTATCACAATTCATACATTTCTGAAAATGCTTGAACACTACTGTCAG  
AAAGGCCAGCGACATCTCGTAGTTCAACAAATAAAGTTAAAGAGAAAAAAGCTAAAAAG  
GGAAA---AAGTCTACTCAGGAA-----AACGTAACACTACAGCTCCTACTTTGGAA



GAACGTTGGGATATTATTGGTCCCGAATTATCTGCTGTTATGCGC-----GATGCCATT  
-----ATACCTGTAGTGGTGCCGTTTGACGCAACCTTAGACACGCCTATC  
GACGATCAAAAAACGGACGCTATGAAAAGAATCCAGAAATTAATGCGACAAAGAACTTG  
GAACAGGCAGTTGGTCTTCTACGTGCAGCAAGAGAAATCTGGCCT-----GAGAATGAC  
TGTTTCGGAAAAGTGGACATACTTCCCGAGGAAGAATTTCTAGCTCTTCGCGAAATCTTC  
TTTACAGATCTGGGTGATGAGCAAGAA-----

-----  
-----GAGGATGAAGATGAAGAAAAAGAA---GAAGAA  
GAAAGAGAACTGTTGTCCAAGAAATTAACTTTAAATTTGGATGAATTTCTTCAAAGGTTTC  
GCCAATGTGAAGATCGTCAAGGCTTTAACACTACTAATGCAACAATTCGAAAACAACACA  
ATCGAACTTAATCACTATGTTGTAAAAATGCTACATCGGATTGCTTGGGATTGTAAAAATG  
CCGGGCATGATATTTCAAGCATCCATATTTTCAAGATTTTCAAAGAATCCTCGAGTCA---  
AAGGAT-----CCTGCACATAAGGAGCTCCAAAAGTTCGCGGTCTTCATAATCCGC  
CGTTTCATCGAAGTCGCCAGAAGAACCGGAAG-----TCGTATATGGAG  
CTACTCTTCTGGAAGACTACCCGCGACGCGACAGAAATCGTGGATGGTTACAACGCGGAA  
ACGACT---ACAAGAAAGTTTCACGAGCGACCTGGACGGAGGCGGAAGAGGACGAGCTA  
CGTACCCTCTTCATGGAGCATCAGACTAAC---AAATATCCTCAAGATTTAATCGATTGG  
CTATTGGACCATATCATCAATGAAAATAGAACACGACGTATCATCATTAAAGAACTCAAG  
GAGATGTGCTTGATCGTCAATTCTAAGGGCGTGGAGCTGAAGTGCAAAAAGAGA-----  
---TTACCTAAAGAGTGGTCTGAAGAAGAAATCGCCAGCTTACAGAACTTTGGACACAG  
TTCAAAGACGATGATGATCCTGTGGATTTGATTTTCACCGATCTTAGAATAAAGCGACCA  
AAGCCGAAGATCAAGGAGAAGCTTCTGGAATTAGGATTGGTGCAGGATCGCAAGGAATTG  
CGCAAAAAGCGATCCAGGAAAAGCAACCAGGGTAAATCGTCGTGGGAAACGCAAGCTGCC  
AGTAATTTGACGGGAACGAAAGTTCAGCCACCGACGACGAAGACGGCGAAGAACTCGA  
AAATCCTCGAAGCGCGGC-----GCGCCTCGGCGAAGCGAGGAGCCG---ACG  
AAAAAGAAGCAACGGAACAGGCAGAAGCTACTGACG---ATCGTTTACACGGATGCACAA  
TTATCCGGTCTCTTGAAGGACGTCATCGACAGGAACATGGAAGAGGCATTGGAATGGATC  
AAGGAATCCCTACAAGACGTTCTGGACGATCGTGAC-----GAAGAGAGC  
TCGAGGGCATAACCTTGGTGCCTACTGACAGATTACTCGTTGGCCGCGATGGATTACCG  
AGTTTTCAAAGCTCCTTCGCGCCATGGGATTTGTGCCACCGCTGATGGCCAGGAATCT  
TATTGGCGTATCCAGCGAATATACTTACAACCACACTTCAA

>Acyrtosiphon\_pisum

AAATTTGGAGGCCGATACGTTGTTTCTGGTATGAAATCAATTGGTGAAGAAATGAAATGGTT  
GTTTCA---TCAATGACATCTAACATTAATAAAGCTTTTGACCGTCACAAGAAA---CCT  
CTTAAAACTCCTCGTAACAGATTACCTATGAGAGATGCTGGT-----  
-----ATTGAACGCAAGTCTGCGTTTAGTGTAGACTCTTCTTAAAAGAGTTCTGT  
GTCGAATTTTACATGGGGCATATAACATGTTAATGAAGCACGTCAGAGAAATGTTAGTG  
CGTTCAAAA---GGCCAGCCTAAT-----GATGAGTCATATTATTTTGGGCGATGCAA  
TTTTTCATGGAATTCATCGAAATTAC---AGATTTGAAATTAACACTAGTTAGCGAAACT  
ATGGCTTTAAACATATTTTCAATTTGTCCAAGAACGCATTGAAGAAAGCCGTGAAAAATTG  
ATA-----ACTGATAAAAAAAAAAATCCCTATTTGGTCTAAACGCATGCATTTAGGA

CTTAAAGCTTATAAAGAATTAATAGAAACACTCTTAGTGATGTATCAAAGTAAAAAC---  
CCAACGTTAGAATCTAGTGCTCGGACAATTTTAACTAATTTATTTTACATGGTTGAGTAT  
AGAGATTTGCTATTGAGTTTGCTAAATTTATATGATGAAACAAAATTTCTCACAAATGTAC  
CTTAAGGATCTTATTGAAACAAATCATGTTTTTATGAAGCTTTTAGAGCATGTAGGTAAA  
AAACAG---CGTAATTTGATTGTGCAGTGCAAACAAGAAAGAAGGCTTCTAAAAAA  
ACCAAACTGCTACTCAAGTTACTCCA-----GAAAATGATGATGAT---  
---ATGTGGAATAATTTTCAGTCCAGACCTCAAAGAAATTATTCAAATACGTGATCTAGCT  
GTTGAT-----GCCATTGAAGCAAGACCTTATGACCCTATATCTGAAGTGCCAATG  
GAAGATCAAAAAGTTGAAGCCATGCAACGTATACGAATACATATAAGAAATAAACGTTTG  
GAAGAATCTGTACAACCTATTAAGAGCTTCTAGGGAAGTTTGGCCC-----GAGGACAGT  
TATTTTGGAAAACCAGGGCTAAATAGCGATGACGAATTAGACATTTTAAAACAAATATTC  
CATGCTGATCTTGAACGCCATAGGTTATGATGAAAACGTTACAGAATCTAATGATACC  
GAA-----  
-----AATATCAATGTTGGTGATGAGGAAGAAGATGATGAAGAAGAG  
TCTAGTCAAATTAGAACAGAAGAAGCAAATTTTGAATTCATAGATTTTGTAAAGAAATTT  
GCAAAACCGAAAATTTTACAAAACCTGCTGTCAACTCTTGAAAGAATTTGATAGTAATTC  
ACATATACCAATCATGCTATAGTGAAACTTCTCCATCGCATTACATATGACTGCAAGTAT  
AGTGCTTTGATGTTTCAAGCTTCTGTTTTTCGAGTTTTTCAAAAAATATTTTCGTCC---  
---AAAAAT-----CCTAATCATAAAGAATTAAAACATTTTGCTACATTTATTATGAGA  
AAATTTACGGAAGTAGCAAAAAAAAATAAAAAA-----GTTTTTATGGAA  
ATATTGTTCTGGAAAGAATTA AAAACCGGTTTGA AATTGAAGAAGGATATAATTCAGAT  
CAAATC-----CCTAAAACA-----AATTGGAGCGAGGAACAAGAAGATGAGCTA  
CATAGATTACATGAAGAATATACAAGAGAT---ATGCCCGATGAAGATGAAGTGGCTTGG  
ATATGCAAGAACCTAATTAGACAGGACCGTTCAAGAATTAGTGTTCTTAAAAAACTCAA  
CAACTTGAAATCATTCCA-----ATAAGGAAAGCACCAAAAATC  
ATAAGA-----GAGTTTTCTGAAGCTGAAATTTGTACAAATGACTCAGTTATTCCAAGAA  
TTTAAAGATGCAAGCAATCCAATACATTTAATCATGAATAAATTAGATGTAAAACGTCCA  
AGAAACCACATAATTGATAAGATGCTTGAATTGGGTTTAAATTAAAGATCGAGACGAGCTG  
AGAAAAAAAACCTAAGAATTCTAATAAATCTAAGAAAAACCAAAATAATTCGAGCGAT  
-----GAAAGTAATGAT  
GATTTGGATTCAGATAATGAT-----  
-----GATACAGAACCTATTTACCATAGCTTAACTTCTGTTTAT  
GTATTGAACGCTATTA AAAAAGTAATTGATAAAGATATGAAAACAGCTCTATTGTGGTTG  
GTTGAGAGCTTAGACGAGGCTGCAAACGATTTAGATGTAGAC-----GAATCTGAT  
-----ATACCCCTATTGCCATTGACTGATGAATGTATGACAGCTGTTAATGATATT  
GATTTTCAAGAAATGATGCAAGTATTAGGCATACATAAACCGTCGAGTATTCAGGAAACC  
TATTGGCGTATACCGGTAGATGGCAAGCAAATGATATCCGC  
>Anopheles\_gambiae  
CGTTTTCGTGGCACGTACACGTTCAACAATGTGAAATCCATCTCGGACAGTGATGCCGTT  
TGCCACCAGTCGTTGGGCAAGATAATGCGCATGGACTTTAGTTTCGGAAAAGCAT-----  
CGCCAGAAGGTGTCGTTCCGGAACGCGAAGGAAACGGAAACG-----

-----TTCGAACGGAAGAGCATCTTTTCGGTGCGCTTGTTTTTGGCGGAGTACTGC  
ATGGAGATTCTGCGC---GTGTACAACAATATGGTGCGCCAGGCACGGCGCTACCTGAAC  
CAGCACGGGACGTCGGTGTGCGGAGTTTCATGACGATTCGTACCTGCTGTGGGCCATACGG  
TTCTTTCTCGAGTTTAACCGGCACAGT--GGGTTTAAAATCGAACTAGTGAGTGAATCT  
TTAAACATCGACACGTTTCATTGGACAGTAACACGCATGGACACGTACACCGAGAACATC  
ACT-----ACGGATAAAACACGCAAAGCGGTCTGGGCAAGGCGTTTGCATCTAACT  
ATACAGACTTATCGGGAGCTGCTAAACAATATGCATGCGCTGGAAAAGATTAAGGAT---  
ACAGCGGCTTCCGAGCTTCTCTCGGTAAGTGCAGAACAACATCTTCTACGTCGTAGAGTAT  
CGTGAACGACCCTTCACCTGTTGACGAGTTTCAAGGAAGCATTACATACAAAAGCTTAT  
CTAAGAGATGTCATCGAAGTGGCGCATCTGTTCTTTAGCATGTTGCAGCGATTCTGCAAG  
GGCACGGTGC GCGTACAGGAGCGGGTAAAAGCAAAG-----CGCAAGAAGGCTAAA  
AAGCAACCCCGTAAGAAA-----ACAACCGAAGAGGAAGAGGAAAATATCGAA  
AATCGCTGGCTGCAGGAAGCACCAACCATTGCCTCGTTGCTGGAAAATGGT---GAACTT  
AAGCAG-----CAGGAGCTACCCACGCCGTTTCGATTTCGGCCTCTTCCGTTCCCTGTT  
GAGGAGCAAAAAGGAGATTGTTTGAAGAGTATCCATTGCTTGCTGAGGAAAAAGAACTAC  
GAACAGGCAATCAAATGCTGTATGCTGCAAGATCGGTTTGGACG-----ACGAGCAGC  
TGCTTTGGCAGCGAGACTGCCACCCGGATGAGGATCTGATCACGTTCAAGACATTTTC  
GCCGCCAATTTGTCTTCTGCGACTGATGCGGACGATAATGATGGTGAGGTGCAAGAAGAT  
TCAGAA-----  
-----GAAGAAGATGAACTGGAGGAGGAAGGTAAGCAGTGTCTGGAAGAA  
TTTGAAATCGTTAAGCATGAGGAAAAGGATTTTAAATTTGAAGAATTTTCCAAACGCCTA  
GTAGACCATCGCGTGGTTTATGCCTGTACGACGGTGCTAACGGATTGGGAAAAGATCAAG  
ACCACATGTCTGAAGGCAGCCGTGACACTGCTTTACCGCATTTGTGTGCGAGCATAAGATG  
CCCTCGATGCTGTTTCAGGTGTCACTTTTACGCATATTTCAAGCTGTGCTGAACGCGATC  
GAGGAT-----GAGCATTTCGCGCGAACTTCGCCGGCTTTCGATTACACCGTGCGT  
CAGCTGCAGCAGAAGGTGCTGACTGGGGCCGAGGATGATGGTGGACTGCTGTTTGCCGAG  
CTGCTGTTTGCCAAAACGTGCGGAATTGCGTGCGCACTGGAAATAGGCTACGATGAGGTG  
AAAAGC-----ACAGCCTCCCAAAAAGCATGGACCGAAGAGCAGGAACAAGAGCTG  
CATCGCTTGTATTGAAAATCAAGAAAATCCACAAACAGATCAGGATGTTATCGACTGG  
CTGCTTGAATACTGATCGATCAAACGCGCACCCGGCGTGGCGTGATGAAAAGCTGAAG  
GAGATGGGCCTTACCTTTAAGGCGCCGACCAAAAAGAGCAACGCAAACCGGCAG-----  
CAAAAGGCTAACGCTTGGACGGCCGACGAAGACGGCAAGCTCGGTGTACTGTACGAGGAG  
CTGCGGCTGGACAAAACCCGCTCAAGAGCATTGCTGAAGCGTTCGACAAGAAGTTTACC  
CGCCCGCCATCGCTCGGCGCATGGTTTACCTGGGATTGATTGCGGACGTGGCCGAAATA  
ATGCCATCGAAGCGGCGTGCCAACAAGGAACGGCGAGCGGATAGCGATGGTTCGTCCG  
CAGGACGACGAAAGGAATAGCAAT-----TCCACCGAT  
GAAGAGGAGGAAGAG-----  
-----GAGAAGGAGGAGGAATTCATCAAAGCATCAACAAGCAGCTGAATGAGCCGCTC  
GTGAAGAAAACCTGAAAGCACTCCGTGGCGACGATATGAAGCAAGCCGTACGATGGATC  
GTCGAATGCTTCGAAGAGGTTTCGCAGTCTGTACGAAGACTCGGATCCATCGGAAGACACC  
GAGGGAGGGTTCCGATGATTCCGATTGCACCGTACCAAACCGCTGCCCTGAAGAAACCG

GAATTC AAGCGTTTGCTACGGTCGCTTGGTGTGATGGAC---ACTGGCCGACAGTTCGTC  
TACCATCGGATACCGTTTCAACTGACGCCGGAAGAGTTGAAA

>Apis\_florea

CATTTTGGTGGGACTTACGTGGTGCAAAACATGAAAGCCATTGGTGAGAATCAACTAATA  
TGTCATAAACCGTACCAAAAAATCGAGGCGTTAACTTTGGTCAAGATAAGAAA---AAA  
ATGTCGAAACCGAAAAACAAACGTCCCATGATGGATCCAAGG-----  
-----AGCGAACGTACTTCTACGTTAAGTGTGAGGCTGTTTTTGAAGAATTCTGC  
GTAGAGTTTTTGAACGCCGTTTATAATCCCGTGATGAAATACGCAAGATCTTGTATAATA  
GGTGGCACCAGTAGCGAGCAAAGC-----GAAACAATTTGTTATCTGTGGACTTTGCGT  
TTCTTCATGGAGTTC AATCGGCATTAC---AAATTTGAGGTGAAATATGTAAGCGAAACG  
ATATCTACGGAAATATTTTCATTTGGTACAAAGACAAATGGAACATTATTACGAGATGATA  
ATT-----ACCGATAAAAAGAAAATTCCTCTTTGGTCTTGTAGATTACACATAGCA  
TTGCAAGCATATCAGGAACTTTTGTACACTCTAATAGCGATGGATCAAAGCGCGGAT---  
CGTGGTGTAGAGAATCCAGCAAGGTTATTAAGAGTAACGTGTTTTATGTTCCCGAATAT  
CGGGAACGATTCTTTCCAGCTTCTCAATTTGACGAGCTTAAAATGTCTCGCAAATAT  
TTGATTGATCTTACAACAACGGCACACGTTTTCTTAAAAATGTTGAGCAACTATTGCGAG  
AAAAATAAACGAAGCGTGGTGGTCCAGCAAGTGAAGAACAACGACAAAGGAATAAAA---  
AATAAAAAAAGCAGAACTGAGCAAAAGAGCGAACAACCCCCACCTCCAAGCCTGGAA  
GAACGATGGGATGAAATTAGTCCTCAACTGTCCATTGTGATGCGG-----GAAGGAACA  
-----ATACCGGAAGTGATACCATTGATGCAACTTTGGATGTGCCTATA  
GATGAACAAAAAGTTGACGCTATGAAAAAGATTCAAAAGCTACTGCGACAGAAGTTTCTC  
GAGCAAGCTATTGGCCTTCTTCGTGCATCGAGGGAAGTCTGGCCC-----GAGAACGAT  
TGTTTTCGGAGAGCTGATATTACACAGGAGGGAATTCCTAGCGTTACGTGAGATATTC  
GTTGCAGATCTGGGCGTAATCGAAGAGGAAAACGTTACGCAGAACCGAGAAAAGCAACAA  
GAGGAAAACGTCGAAAGT-----  
---CTTCTTAACGATGAGCCACCAGACGACGAGGATGATGACGAGGAAGAAAGGGAGGCG  
GAGCCATATTCTACAGTTGTGGAACCGATTTCAAGTTTTCCGATTTTCGTCCACAGATTC  
GCCAATGTGAAGATCGTGAAAGCGATGCTGATTCTCTGCAACAATTCGACAAGAACACG  
GACGAGGTGAATCATTACGTGAACAAGATGCTTCATCGGATAGCGTGGGACTGCAAAATG  
CCAGGGATGATGTTCCAAGCGTCGATGTTCCGAGTTTTTCAAAGAATCCTCGAGTCC---  
AAACAT-----CGCGGCCACAAGGAACTGCAAAAGTTGCGGGTCTTCATAATCCGC  
CGTTTCATCGAAGTCGCGCAGAAGAACCGGAAA-----GCGTACATGGAG  
CTGCTCTTCTGGAAGACCACTCGTGACGCGACCGAGGTCGTGAGGGTTACAACGCGGAA  
ACGGAT---ACAAGAAAGTTTCGCGCAACCTCTGGACCGAAACCCAAGAGGACGAGTTA  
CGCACTCTCTTTATGGAACATCAGACTAAC---AAGTATCCCAAGATGTCATCGATTGG  
ATACTCGAGAATATTAATCAAGAA---CGAACACGTCGTGGCATCATAAAGAAATTGAAA  
GAAATGTCTCTAATTATCAATTCTAAGGCTGTACGAAGCGAAGTGCAAAAAAGG-----  
---CTTCAAAGGAATGGTCCGAACAAGAGATCGCTCAGCTCAGCGAACTTTGGGAAGAA  
TTAAAAAATGACGATGATCCCGTGGACCTGATCTTCAATGGGCTGACAATAAAGCGGCCG  
AAGCCAAAGATCAAGGAGAAGCTTTTGGAAATTAGGATTGGCCACGGATCGCAAGGATCTT  
CGCAAAAAGCGATCGAGAAAAAGCAACCACGGTAAATCGTCGTGGGAAACGGAGTCTGTC

AGTAATTCCGACGAGGATAAAAAGC-----AGCGACGAAGAAGCTGGG  
AAATCCTCGAGCAATAAGAAC-----ACGGCTCCCAATAAACCGAGGAAC  
AAGGGAACGAAGAAAAATGCGAAGAAACAGACAACG---ATGGTTTACACGGATGCACAA  
TTATCTGGACTCTTGAAAGATGTCATCGAAAGAAATATGAGCGAGGCTCTGGAATGGATC  
AAGGAATCCCTACTGGATGTCCTGGACGATCGAGAC-----GAGGAAAGC  
TCCGAAGGTATCCCTTTAGTCCCGCTGACAGATTATTCGTCCGGCTGCGATGGATTACCG  
AGCTTTCAGAAGCTTATTCGGGCTATGGGATTCACACCTCCTGCTGATGAACAAGAATCT  
TATTGGCGCATACCATCTAATATGCTTAGCTCCATGATTTCAG

>Apis\_mellifera

CATTTTGGTGGGACTTACGTGGTGCAAAACATGAAAGCCATTGGTGAGAATCAACTAATA  
TGTCATAAACCGTATCAAAAAATCGAGGCGTTAACTTTGCTCAAGATAAGAAA---AAA  
ATGTCGAAACCGAAAAACAAACGTCCAATGATGGATCCAAGG-----  
-----GGCGAACGTACCTCTACGCTAAGCGTGAGGCTGTTTTTAAAAGAATTCTGC  
GTAGAGTTTTTGAACGCCGTTATAATCCCGTGATGAAATACGCAAGATCTTGTATAATA  
GGTGCTACTAGTACCGAGCAAACC-----GAAACAATTTGCTATCTCTGGACTTTGCGT  
TTCTTCATGGAGTTCAATCGGCATTAC---AAATTCGAGGTGAAATATGTGAGTGAAACG  
ATATCTACGGAAATATTTCAATTTAGTGCAAAGACAAATGGAGCATTATTACGAGATGATA  
ATT-----ACGGACAAAAGAAAATTCCTCTTTGGTCTTGTAGATTACACGTAGCA  
TTGAGAGCATATCAGGAACTTCTGTACACTCTAATTGCGATGGATCAAAGCACAGAT---  
CGTGGTATTAGAGAATCCAGCAAGGTTATTAAGAGTAACGTGTTTTATGTTCCCGAATAT  
CGGGAACGATTCTTTCCAGCTTCTCAATTTGACGAGCTTAAAATGTCTCGCAAATAT  
TTGATCGATCTTACAACAACGGCGCACGTTTTCTAAAAATGTTGAGCAACTATTGCGAG  
AAGAATAAACGAAGCGTAGTGGTCCAGCAAGTGAAGAACAGACGACAAAGGAATAAGAAA  
AATAAGAAAAAGGCAGAGAGTGAGCAAAAGAGCGAACAATCGCCACCTCCAAGCGTGGAA  
GAACGATGGGATGAAATTAGTCCTCAACTGTCCATCGTGATGCGG-----GAAGGGACA  
-----ATACCGGAAGTGATACCGTTCGACGCAACTTTGGATGTGCCTATA  
GACGAACAAAAGTTGATGCTATGAAGAAGATTCAAAGTTATTGCGGCAAAAGTTTCTC  
GAGCAAGCTGTTGGCCTTCTTCGTGCGTCGAGGGAAGTCTGGCCC-----GAGAACGAT  
TGTTTCGGGAGAGCTGATATTACACAGGAGGGAATTCCTAGCGCTACGCGAGATATTC  
TTTGCAGATCTGGGCGTGATCGAAGAGGAAAATGTTGCGGAAAGCCGGGGAGAGCAGCGG  
GAGGAAAATATCGAAAGT-----  
---CTTCTTAACGACGAGCCA-----GATGATGAGGACGATGATGAAGAAAGGGAGGCG  
GAGCCGTATTCCACGGTGGTGAAACCGATTTCAAGTTTTCCGACTTCGTCCACAGATTC  
GCCAATGTGAAGATCGTGAGAGCAATGCTGATCCTCCTGCAACAATTTGACAAGAACACG  
GACGAGGTGAATCATTACGTGAACAAGATGCTTCATCGGATAACGTGGGACTGCAAGATG  
CCAGGAATGATGTTCCAAGCGTGCATGTTCCGAGTTTTTCAAAGAATCCTCGAGTCC---  
AAGCAT-----CGAGGCCACAAGGAAGTTCGCGGTGTTTATAATCCGC  
CGTTTCATCGAAGTCGCGCAGAAGAACCGGAAA-----GCGTACATGGAG  
CTGCTCTTCTGGAAGACCACTCGTGACGCGACCGAGGTCGTGAGGGTTACAACGCGGAA  
ACGGAT---ACAAGAAAGTTTCGCGCAACCTCTGGACCGAAACCCAAGAGGACGAGTTA  
CGCACTCTCTTTATGGAACATCAGACTAAC---AAGTATCCCAAGATGTCATCGATTGG

ATACTTGAGAATATTAATCAAGAA---CGAACACGTCGTGGCATCATAAAGAAATTGAAA  
GAAATGTCTCTGATTATCAATTCTAAGGCTGTACGAAGCGAAGTGCAAAAAAGG-----  
---CTTCCAAAGGAATGGTCCGAAGAAGAGATCGCTCAACTCACCGAACTTTGGGAACAA  
TTAAAAAATGATGATGATCCCGTGGACCTGATCTTCAATGGGCTGACAATAAAGCGACCG  
AAGCCAAAGATCAAGGAGAAGCTTTTGAATTAGGATTGGCCACGGATCGCAAGGATCTT  
CGCAAAAAGCGATCGAGAAAAAGCAACCACGGTAAATCGTCGTGGGAAACGGAGTCTGT  
AGTAATTCCGACGAGGATAAAAGC-----AGCGACGAAGAAGCTGGG  
AAATCCTCGAGCAATAAGAAC-----ACGGCTCCCAATAAACCGAGGAAC  
AAGGGAACGAAGAAAAATGCGAAGAAACAGACAACG---ATGGTTTACACGGATGTACAA  
TTATCTGGACTCTTGAAAGATGTCATCGAAAGAAATATGAGCGAGGCTCTGGAATGGATC  
AAGGAATCCCTACTGGATGTCTTGGACGATCGAGAC-----GAGGAAAGC  
TCCGAAGGTATTCCCTTAGTCCCGCTGACAGATTATTCGTCCGGCTGCGATGGATTCACCG  
AGCTTTCAGAAGCTTATTCGGGCTATGGGATTCACACCTCCTGCTGATGAACAAGAATCT  
TATTGGCGCATACCATCTAATATGCTTAGCTCCATGATTCAG

>Atta\_cephalotes

CGATTCCGGCGGTACTTACGTCGTGCAAAATATGAAAGCTATCGGAGAAAATCAAATGATA  
TGCCATAAACCATATCAAAAAATCGAAGCAGTGGAAATTTGGTCACGATAAGAAA---AGA  
GTGAAGCGACGCAGAGATAAAATGAGCTTGCAAGACGCCAAG-----  
-----GAAGAGCGCACGTCTGCCCTCAGCGTACGGCTCTTTCTAAAAGAATTTTGT  
GTAGAATTTCTAAGCGGGGCTTACAACCCCGTGATGAAATTCACTCGATCTTGCTTCATC  
AATGACCCCTCATGGCCAAGCCGTA-----GAAGCAGCTGTCTATCTGTGGGCCTTACGT  
TTCTTCATGGAGTTCAATCGACATTAC---AAGTTTCAAGTGAATATGTAAGCGAACT  
ATATCTACAGAAGTGTTTTATTTAGTGCAAAGACAAATGGACCAATATTATGAGATGATA  
ATA-----GTTGATAAAAAAAGATACCACTTTGGTCTCGTAGATTACATTTGGCA  
TTAAAGGCATATCAGGAACTTCTTAACACTCTTATGGCAATGGATAAGAATAGTGAT---  
GATGGTGTAGAGAATCTAGCAAGATAATTAAGTAATATCTTTTATGTCCCGGAATAT  
CGGGAACGATACTCTCTCAGCTTTTGTGCTTCGATGAAGTTAAAATGTCACGGCAGTAC  
TTAGTGGATCTTATCACAACCTATTACATCTTCTGAAAATACTTGAACACTACTGTCAG  
AAAGGCCAGCAACATCTCGTAGTTCAAAAAATAAGTTAAAGAGAAAAAGAACTAAAAAG  
GAAAAA---AAGTCTACTCAGGAA-----AATGTAACA---GCTCCTACTTTGGAA  
GAACGTTGGGATATTATTGGTCCCGAATTATCTGCTGTTATGCGC-----GATGCCGTT  
-----ATACCTGTAGTGGTGCCGTTTGATGCAACCTTAGACACACCTATC  
GACGATCAAAAAGCAGATGCTATGAAGAGAATCCAGAAATTAATGCGACAAAGAACTTG  
GAACAGGCAGTCGGTCTTCTACGTGCAGCAAGAGAAATCTGGCCT-----GAGAATGAC  
TGTTTCGAAAAGTGGACATACTTCCCGAGGAAGAATTTCTAGCTCTTCACGAAATTTTC  
TTTACAGATCTGGGTGATGAGGAAGAA-----

-----

-----GAGAATGAAGATGAAGAA-----GAAGAA

GAAAGAGAACTGTTGTCCAAGAAATTAACTTTAAATTTGGATGAATTTCTTCAAAGGTTT  
GCCAACGTGAAGGTCGTCAAGGCTTTAACACTACTAATGCAACAATTCGAAAACAACACA  
ATCGAACTTAATCACTACGTTACAAAAATGCTACATCGAATTGCTTGGAAATTTGAAAATG

CCGGGTATGATATTTCAAGCATCCATATTTTCGGATTTTTTCAAAGAATCCTCGAGTCA---  
AAGGAT-----CCTGCACATAAGGAGCTCCAAAAGTTCGCGGTCTTCATAATCCGC  
CGTTTCATCGAAGTCGCCAGAAGAACCGGAAG-----TCGTACATGGAG  
TTACTCTTCTGGAAGACTACCCGCGACGCGACAGAAATCGTGGATGGTTACAACGCGGAA  
ACGACT--AACAAGAAAGTTTCACGAGTGACCTGGACGGAAGCGGAAGAGGACGAGCTA  
CGTACCCTCTTCATGGAGCATCAGACTAAC---AAATATCCTCAAGATTTAATCGATTGG  
CTATTGGATCATGTCAATGAAAATAGAACACGACGTACCATCATTAAGAACTCAAG  
GAGATGTGCTTGATCGTTAATTCTAAGGGCGTGCGAGCTGAGGTGCAAAAAGAGA-----  
---TTACCTAAAGAGTGGTCTGAAGAAGAAATCGCCAGCTTACAGAACTTTGGACACAG  
TTCAAAGACGATGATGATCCCGTGGATTTGATTTTCACCGATCTTAGAATAAAGCGACCA  
AAGCCGAAGATCAAGGAAAAGCTTCTGGAATTAGGATTTGGTGCAGGATCGCAAGGAGTTG  
CGCAAAAAGCGATCCAGGAAAAGCAACCAGGGTAAATCGTCGTGGGAAACGCAAGCTGCC  
AGTAATTCTGATGGGAACGAAAGTTCAGCCACCGACGACGAAGACGACGAAGAACTCGA  
AAATCCTCGAAGCGCAGC-----GCGCCTCGACGAGGCGAGGAGCCG---ATG  
AAAAAGAAGCAACGGAACAGGCGGAAGTTACCGACG---ATCGTTTACACGGATGCACAA  
TTATCCGGTCTCTTGAAGGACGTCATCGACAGGAACATGAAAGAGGCATTTGGAATGGATC  
AAGGAATCTCTGCAAGACGTTCTGGACGATCGTGAC-----GAAGAGAGC  
TTCGAGGGCATAACCTTAGTACCACTGACAGATTACTCGATGGCCGCGATGGATTCACCG  
AGTTTTCAAAGCTCCTTCGCGCCATGGGATTTGTGCGCCGGCTGATGGCCAGGAATCT  
TACTGGCGTATCCAGCGAATATACTTACAACCACACTTAAA

>Bombus\_terrestris

CATTTTGGTGGAACCTTACGTTGTGCAAAATATGAAAGCCATTGGAGAAAATCAGCTATTA  
TGTCACAAACCATAACCAGAAGATCGAGGCACTAAACTTCGGCCAAGATAAGAAA---AAA  
GTGTCGAAACCGAAAAACAAACGTCCCATGTGGGATCCAAGG-----  
-----GGTGAACGTACATCTGCGTTGAGTGTGAGACTCATTTTCAAAGAATTTTGC  
ATAGAATTCCTGAATGCTGCTTACAACCCCGTAATGAAATACTCAAAGTCTGTATAGTC  
AGCGGAGCTCAAACCAATCAATCT-----GAAACAACCTTGTACTTATGGGCCTTGCCT  
TTTTTCATGGAGTTCAACCGCCATTAC---AAGTTTGAAGTAAAATATGTGAGTGAAACG  
ATATCCACGGAAGTATTTCAATTTAGTACAAAGACAAATGGATCATTATTACGAGATGATA  
ATT-----ACTGACAAAAAGAGAATTCCCCTTTGGTCTCGTAGATTACATTTAGCA  
TTGAAAGCGTATCAGGAACTTCTGTACACTTTAATGGCAATGGATCAAAGTACAGAT---  
CGTGGTGTAGAGAATCCAGCAAGGTTATTAAGAGTAACGTGTTTTATGTTATGGAATAT  
CGGAAACGATTCTTTCTCTCCTTCTCTGTTTCGACGAGGTTAAAATGTCTCGACAATAT  
TTGATTGATCTCACTACAACAGCACACATCTTCTTAAAAATGTTGAGTAATTATTGTGGG  
AGAAATAAACGTAGCGTAATAGTCCAGAAAGTGAACCAACACGACACAAAAGAACA---  
AATAAAAAAAAGCTGTACAGAAA-----GAACAACCTCCGGTTCGAAGCTTAGAA  
GAACGTTGGGACGAAGTTAGTCCCAACTATCTATTGTAATGCAA-----GAAGGAACG  
-----ATACCGCAAGTTATACCATTTGATGCAACGTTGGATGTACCTATA  
GATGATCAGAAAGTTGATGCAATGAAGAGGGTCCAAAAGCTACTACGGTCCAAGGATCTG  
GAGCAAGCTATTGGACTTATTCGTGCAGCAAGGGAAGTCTGGCCC-----GAGAACGAC  
AGTTTCGGAAGTGCTAATATTACGTCGGGGGAGGAGTTTCTAGCGCTACGGGAAATCTTC

TTCGCAGACTTGGGTGTGGTTCGAAGAAAATCCTGTTACACAAAGCAAAACACACGAG---  
GAGGAAAACGTTGATAGC-----  
---CCCAAT-----GACGAGTCAGAGGAAGATGAAGAGAACGCATCG  
CAAACACACTCTTCAGTTGTAGAACTGATTTCAAATTTCCCTGACTTCATCCACAGATTT  
GCCAATGTAAAAATCGTGAGAGCAATGTTGGTCTGCTGCAGCAATTTGACAAAAATACA  
AACGAAGTGAATCATTACATTACCAAGATGCTTCATCGAATAGCCTGGGACTGTAAAATG  
CCAGGGCTCCTATTCCAAGCGTCAATGTTCCGTGTTTTCCAGAGAATTCTTGAGTCT---  
AAGTAT-----TGCGGTCAACAAGGAAGTCCAAAAGTTCGCAGTCTTCATAATCCGA  
CGTTTCATCGAAGTCGCGCAAAAGAACCGGAAA-----GCGTATATGGAG  
CTGCTCTTCTGGAAGACCACTCGTGACGCGACCGAGGTCGTGAGGGTTACAACGCGGAA  
ACGGAT---ACAAGAAAGTTCGCGCAGCCTCTGGACCGAAACCCAGGAGGACGAGTTA  
CGCACTCTCTTTATGGAACATCAGACTAAC---AAGTATCCCAAGATGTCGTCGATTGG  
ATCTTAGAGCACATTAATCAAGAA---CGAACGCGTCGTGGTATCATGAAGAAGCTGAAA  
GAAATGTGTCTGATTGTTAATTCTAAGACTATACGAAACGAGGTACAGAAGAGA-----  
---CTTCAAAGGTATGGTCCGAGGACGAGATCAGTCAGCTTACGGAACTTTGGGAACAA  
CTGAAGCAGGACGATGATCCCGTGGACTTGATCTTCAATGGGCTCACATAAAGCGGCCG  
AAGCCAAAGATCAAGGAGAAGCTTTTGGAAATTAGGATTGGCCACGGATCGCAAGGAGTTG  
CGCAAAAAGCGATCCAGAAAAAGCAACCACGGTAAATCGTCGTGGGAAACGCAGTCTGCC  
AGTAATTCGACGAGGATGAAAGT-----AGCGACGAAGAAGCTGGG  
AAATCCTCGAGCAATAGGAAC-----GTGGCTCCCAATAAACCAACGAAC  
AAGGGAAAGAAGAAAAATGCGAAAAACAGCCAACG---ATGGTTTACACGGATGCACAA  
TTATCCGGACTCTTGAAGGATGTCATCGAAAAAATATGAGCGACGCTCTAGAATGGATC  
AAGGAATCCCTACTAGATGTCCTGGACGATCGAGAC-----GAGGAAAGC  
TGCGAAGGTATCCCTTAGTCCCGCTGACAGATTATTCGTCTGCTGCGATGGATTACCG  
AGCTTTCAGAAGCTTATTCGAGCTATGGGATTCACACCTCCTGCTGATGAACAAGAATCT  
TATTGGCGCATACCGTCTAATATGCCTAGATCGATGATTCAG

>Bombyx\_mori

CGATTCCGGAGGAACATATGTTGTGCAGAACATGAAATCTATATCGGACAACGAGATAATT  
AGCTTGAAGCCATTAACGACATATCGAAATTAGATTTTAGCGGGCGGAAAAAATCGAAA  
CTGGTGAACCAAAAAACAGGAGGCCAATGGAAAGTGGAAATG-----  
-----TTAGAGAGGCGGTCCGCTTTCGCGATAAGATTATTCTTAAAAGAGTTTTGC  
ATTGAGTTTTTAAACGGCTCCTACAATTCACTCATGCATTACGTCAAGGACGTACTIONGTC  
AGAGCCAAG---GCCAGCAAAAC-----GACGAGTCGTATTACTTGTGGGCGGTTAAA  
TTCTTCATGGAATTTAATAGAGGACAC---AATTTTCAAGTTGGATTGATCAGCGAAACT  
ATGTCAATTCCTATGTTCCATTACGTGCAACAACAAATGGAGAAATACTATGATATGATC  
AAA-----GTTGAAAAAAGAAGTTCGGAGTCTGGGTTAGGAGGTTGCACCTGGCG  
TTGCGCGCCTACAAGGAAGTCTCTACACCTTACTGGCCATGGACAAAAGCACCGAT---  
CCAACGGTCAAAGAATCCGCTAAAGTATTAAGAGTAATATATTTTACGTCCTAGAGTAC  
AGAGAGTTCATACTAAACACATTTCTTAACTACGACGAAAATAAAATGCCAAGGTCTTAT  
TTAGTGGATTAGTTCGAAACTGTACATTTATTCTTAAAATGCTTGAACATTATTGCAAG  
AAGACC-----GGATTAGTGGTGCAGAAGAAGATCAAGAAGAAATCCAAATCTAAGAGG



AACAAACCGAGAGCACAAAGAGCTCCG-----CCAACGGAGCCAGGAGCC  
CCCGCGTGGGAGGAGGCCCGGCCTCAGCTGGCGGCCGTGCTGTCC-----GCAGGCCCG  
-----GAGGAGTACCCGCCGCCCTTCGACGCCGCCCTCCGATGTTCCGATA  
GACCAGCAAAGGAAGATTGCATGAGGAACATACAGAAGTCGATGCGGGAGTACAAGTTC  
GAGAACGCCGTCGGGATGTTTCAGGGCTGCGAGGGAGGTGTGGCCC-----GAAGACGGT  
ATTTTCGGTGCTAGCGACATCGCTGAAGACGAAGAACTGAGTATGCTGGAAACGATTTAT  
AACACTGATTTGGGTGTTGTGACAGATGTCACAGAAATTGACGAAGTCGACGAAACCCAA

-----  
-----GGTTCAGAATACGAGGAG

GAAGGC-----AAGTTT  
TGTCATCCAAAAGTTGTGAGCTCATGCGTCTCGCTGTTGGAACGATACGACAAAAATTTA  
CCCCACACAAATCACTGTGCCATCAAATGCTGCACAGAGTCGCTTGGGATTGCAAACGA  
CCCTCCATGATGTTTCAAGCCAGCTTGTTTTGTATTTTCAAAAAATATTCAACAAT---  
CCCATG-----CAGCAACATAAGGAATTAGAGAAGTTCGGTATATATATTTTCCGA  
AAATTCACCGAAATAGCCTCTAAAAACCCGAAA-----GCCTTCATAGAA  
CTGTTGTTCTGGACAAATTCCAAGACGCATTGGACATTGAATACGGATACGATCCCTAC  
ACCGACAGCAGAGACAAACTGGGCAAAGGCGTTTGGTCCGAAGAACAAGAAGAAGAACTC  
AGACGGCTTTACATGGAGAATCAGACCAACCCGAAACAGATCAAGACGTCATCGATTGG  
ATCCTGGAAAACCTGATAGACCGTACTCGAACCCGACGGTCGTTATAAAGAACTAAAA  
GAACTAGGACTCATATTCAAAGCTCCTACGAAGCGCAGTAACAAGGAGCGAGCGAGAGAG  
AGAGTGCCCAAAGAGTTCAGCCCAGAAGAGGACGAAATGCTTCAGGAACTATGGCCCGAG  
TATGCCGACTCCACTGATCCAATGGCTTTCATCATGTCTCGTATGCCTCGAAAACGGCAG  
AAGAAAAGCTACGTGGAGAGGTTATTGGAACCTCGGCCTCGTAAAGGATAAGAATGAGTGT  
CGTAAAAAAGACAAAAGAACTCC---GAAGGTAAAAGCACCCGCTCGGGCGACGATAAA  
TCGAACGACGATGAATCTTCTAGT-----TCGGGATCCGAATCGGAG  
AGCGATACCAAACGCACGTCG-----TTCCCGTCCAAACAGACGGCACCA  
AAGCCCCGCAAACAAAAAATCAGACAAAAGCTAAACGCGTGGAATTGAATGCGAGCCAA  
GTCGCCAAGTTGTTGGTCAGCGCCGTCGACAACGGATTATCCGGAGCATTAAAATGGCTG  
GCGGAAAATCTAGAAGAACTAGCCCTGGACCAAGAAGCGGAGGGC---TACGATCCGAAC  
TCTGAAGGCACACCGCTGGTGGCCATAACCGATGAGTCAACCGAAGCCATGGACAAAGAA  
CTTTTCAAACAAGTACTGCTGGGGATCGGTGTGGTCCCGCCTAATGATGAACAGGAATCC  
TACTGGAGAATACCGAGCTGTTTACATTTTGTAGACGATCAGA

>Camponotus\_floridanus

CGATTTGGCGTACTTACATTGTCCAAAATATGAAAGCAACTGGAGAAAATCAAATGATA  
TGTCATAGACCGTATAAAAAAATCGAAACTCTGGAATTTGGTCATAATAAGAAA---AGA  
GTGAAACGACGCAAAGATAAAATGAGGGTACAGGACGCTAAA-----  
-----GTGGAACGTACATCTGTCTCAGTGTACGACTTTTTTCTAAAAGAATTTTGC  
GTGGAATTTCTTAGTGCAGCATAAATCCCCTAATGAAATTCGCCAGATCTTGTATCATT  
AATGTTACTCATGGTGAAGCATCC-----GAAATAACTTCTTATTTATGGGCTTTGCGT  
TTTTTTATGGAATTCATCGCCATTAC---AAGTTTGAAGTAAATACGTGAGCGAAACG  
ATATCTACAGAAGTATTTATTTAGTACAAAGACAAATGGAACACTACTATGAGATGATG

ATA-----ACTGATAAGAAAAAGATACCGCTTTGGTCTCGCAGATTGCATTTAGCA  
TTGAAAGCATATCAGGAGCTTCTTAATACTCTTATGGCAATGGATAAGAGCATAGAT---  
CGCGGTGTCAAAGAATCCAGCAAATAATTA AAAACAACATCTTTTATGTTCCGGAATAT  
CGGAAACGATACTCTCTCAGTTTTTGTGTTTCGATGAGACTAAAATGTCACGGCAATAC  
TTAGTGGATCTTGTACGACTGTT CATATATTTTTGAAAATGCTCGAACATTTTTGCCAG  
AAAGGTCAACGACACCTCATGGTTCAACAAACAAAGCCAAAGCGAAAAAAGCTAAAAGA  
CAAAAAAACCTGCTCATCAGAGG-----ATTGTAAC TCCGGTTCCTACTTTGGAA  
GAACGTTGGGACATTATTAGTTCTGAATTATCTGCTGTAATGCAA-----GATGGTATC  
-----ATACCAGAAGTGGTGCCATTTGATGCAACCTTAGATATGCCTATT  
GACGATCAGAAATCAGATGCTATGAAGAAAATACAGAAATTAATGCGACAGAGCAACTTG  
GAACAGGCGCTTGGTCTCTTACGTACTGCAAGAGTAATCTGGCCC-----GAGAATGAC  
TGCTTTGGAAGAACGGATATACCTCCCGAGGAAGAATTTCTAGCTCTTCGAGAAATTTTC  
TTTGGCGATCTGGGCGACGAAGAAGAG-----

-----  
-----AATGAA-----GAA  
GAAGAAATAGAACTGTTACGAGACTGATTTTAAATTGGACGAATTTCTTCAAAGGTTCC  
GCCAACGTAAAGGTTGTTAAAGCTTTAACACTGCTACTGCAGCAATTCGAGAACAATACG  
GTCGAGGTAAATCACTATGTAATAAAAATGCTACATCGAATTGCTTGAATGTAAATG  
CCGGCCATGATATCCAAGCGTCTATATTTCCGGATCTTTCAAAGACTCCTTGAATCA---  
AAGGAT-----CCTGGATAACAAGGAGCTCCAAAAGTTCGCGGTTTTCATAATCCGC  
CGTTTCATCGAAGTCGCCGAGAAGAATCGGAAG-----TCGTACATGGAG  
CTGCTCTTCTGGAAGACCACCCGTGACGCGACAGAAATCGTGGATGGCTACAACGCGGAA  
ACGAGT--AGCAAGAAAGTTTCACGAGCAGTCTGGACGGAGGCGGAAGAGGACGAACCTG  
CGTACCCTCTTCATGGAGCATCAGACTAAC---AAATACCCTCAAGACCTGATAGATTGG  
CTTTTGGAGCACATCATCAACGAAAATAGAACGCGACGTACCATCATTA AAAA ACTCAA  
GAAATGAGTTTGATTGTCAATTCCAAGAACGTGCGAGCTGAGGTACAAAAGAGG-----  
---TTGCCTAAGGAATGGTCCGAGGAAGAAATTACTCAGCTTACGGAACTTTGGACACAG  
TTCAAGGACGATGACGATCCCGTGGATTTGATTTTCACCGGTCTTAGAATAAAGCGGCCG  
AAGTCGAAGATCAAGGAAAAGCTTTTGAATTAGGATTGGCGCAGGATCGCAAGGAGCTG  
CGCAAAAACGGGCCAGAAAAGCAACCAAGGTAAATCGTCGTGGGAAACGCAAGCTGCC  
AGTAATTCTGATGGGAACGAAAGTTCAGCCACCGACGACGAAGACGACGAAGAAACTCGA  
AAATCCTCGAAGCGCGGCGC-----GCGCTTCGTGCGAGCGAGGAGTCG---ACG  
AAAAAGAAGCAACGGAACAGGCGGAAGCTACCGACG---ATCGTTTACACGGATGCACAA  
TTATCCGGTCTCTTGAAGGACGTCATCGACAAGGACATGAGAGAGGCGTTGGAATGGATC  
AAGGAATCTCTGCAAGACATTCTGGACGATCGTGAC-----GAGGAAAGC  
TCCGAGGGCATAACCTTGGTGGCGCTGACAGATTACTCGTCGACCGGATGGATTACCG  
AGTTTTCAAAGCTTCTCCGTGGCCTGGGATTTATGCCACCGCTGATGCCAGGAATCT  
TATTGGCGTATTCCGGCGAATATGCTTACAATCACGATTCAG

>Ceratosolen\_solmsi  
AGATTTGGAGGTA CTTACGTTGTT CAGAACATGAAGGCCATTGGAGATAATGAAATGCTC  
TGCCACAAACCTTATCAAAAATTGAAGATTTAAATTTTAGTG TCACTAAGCAA---AAG

ATGAAAAAGCGGAAGAACAACAGCGGGATCATGAGCTTCGGG-----  
-----GACGAGCGCGTGTCCGCCCTCAGCGTACGTCTCTTTCTCAAGGAGTTCTGC  
GTGGAATTCCTGAACGGCGCCTACAACCCGGTGATGAGTTACGCCCGCTCCTGCATCATC  
GGGGGCAAC--TATGCGACCGTC-----GACGCGAGCCACTACCTTTGGGCTCTGCAC  
TTCTTCATGAGCTTCAATCGCCATTAC---AAGTTCCGCGTGAAATACGTGAGTGAAACA  
ATATCAACCGAAGTGTCTATATTGTACAAAGACAAATAGAACATAACTATGAAATGATC  
AAT-----ATCGAAAAGAAGAAGGTAACATTTTGGTCAACGAGACTACACTTAGCC  
TTGAAGGCTTATCAGGAATTGTTGTATACGTTGATCGAAATGGACAAGTCGACTGAT---  
TCTGGCGTGAAGAACTCGAGTCGAGTAATAATGGGCAATATCTTCTACGTACCGGAATAT  
CGGGACACGATACTATCTCAGTTACTTAATTACAATGAACTGATAATGTCAAGAGATTAT  
CTGGTGGATTTGGTCACAACGTACACATTTTTTTTGAAGATGTTAAAAAACTATTGTGAT  
AAACAA--CAGCACCTTATTGTGCAGAAAATCAAA-----CGTAAACAGCCAAAAAAA  
-----ACTGTTGGACCGCCGCCGAGTTGGGAA  
GATCGATGGGACGTTGTGGGACCGGAAGTGTCGGCCGTTATGCAG-----CAGAATGCG  
-----ATACCGGAAGTAATTCCATTGACGCCACAATAGCCACTCCTATA  
GATGAGCAAAGAGCGATGCGATGAAAAGAATTCAGAAGTTATTACGAAACAATAATCAC  
GAACACGCAATCGGACTTTTGGCTCAGCAAGGGAGGTCTGGCCG-----GAGAACGAC  
AGTTTTGGGAAAGCCGACATGGCCGTCGAGGAGGAGTTCCTTGTCTGCGCGAGATCTTC  
CTAGCTGATCTCGGC-----

-----  
-----

-----GGATTT  
GCCAATGTACGTATTGTGAGTAATCTAACAATTCTTTTAAAGCAGTTTGAAAAAACACA  
CCCGAAGTCAATCATGCGTATTAAACTGTTTCATCGAATCGCCATGGAATGCAAAATG  
CCGGCCATGATGTATCAAGCATCGATATTTGAGTCTTTCAAAGGGTTTTTCAATAC---  
GACAGT-----CGCATGTATAAGGATTTAACAGTGTTTGCTCACTTTATATTTGCG  
GGCTTCGTGCAAGTGGCGAAAAGAAATCCAAAG-----GCCTATATGGAA  
CTGCTCTTTTGGAAATCAACAAAGCAAGCGATTGAAATGACGGAAGGCTACGATACTGAA  
CATTC---AGCAATAAAAAGACTCGTAACGTGTGGAGTGACGCCGAAGAAGACGAACTC  
CGAACTTTGTTTATGGAGCATCAAACCAA---AACTCCCCAAGATCTAATTAGTTAC  
ATATTAGAAAATTTAATAAACCAGGACCGCACGAGGCGTGGAGTAATGAAAAAATTAAG  
GAAATGTGCCTGATTGTCAATTGCAAGTCTATAAGAGGTGAAATACAAAAAAGA-----  
---TTGCCGAAAGAATGGTCTGATGAAGAAATCAACCAGTTGACAGAATTATGGGACCAA  
GTAAAGAAGAGCATGATCCTGTTGGATTAATATATGACAGTTTAAGAATAAAAAGATCA  
AAAGCAAAAATCAAAGAAAAACTTTTAGAACTAAATTTAGCTGAAAATGCACAGCAATTG  
AGGAAAAACGAATGAAAAAAGTTTCGGGACCAAAGTCTTCATGGGAG-----AACCCA  
TCTAACAGCGAGAATGAAGATAGTTCGGATTGAGAAATAAATCTGAAAGTATGATGCGC  
CAAATAAGCCTGCAGCGGAG-----AGAAAACAGGAAAAAAAATTTGAAA  
AAC-----AAAAAGAATAAACAAGCATCA---ATTTGTTACACGGATGCTCAG  
TTATCAGGATTATTGAAAGATGTCATTGACAATGGCATGCAGGAGACACTAAGATGGTTG  
AAGGAATCTCTCGAGGAGTCGCTCGAAGACCGCGAC-----GAGGAAACC

GCCGAAGGCCTGGCGTTGGTACCGTTGACCGCCGAGACCTCGTCGGCCTTGGAGACGGCG  
AGTCTCCAACGCCTTCTACGGGCGTTGGGCATCGAGCCACCC---AACGCCGAGGAGTTT  
TATTGGCGAATACCCGCTCTATGCTCGTTACTACCATTAAG

>Danaus\_plexippus

AGATTTGGTGGTACATATGTTGTTTTCAGAATATGAAATCTATATCGGACAATGAGCTGATT  
TGTCTCAAGCCTTTAAACAAGATATCCAATTTGGATTTCAACGGCAGCAAGAAACAGAAA  
TTAGTCAAACCCAAGAATAGGAGACCAACGGAGAGTGGGACT-----

-----ATGGAGAGGAGATCCGCTTTTGTATACGATTATTCTTAAAGGAGTTCTGT  
ATAGAGTTTCTGAACAGTTCATACAATGTTTTGATGCATTACGTGAAGGACGTCCTAGTG  
AGGGCCAAG---GCTCAACAGAAC-----GACGAGTCCATTATCTTTGGGCTGTGAAA  
TTTTTTCATGGAATTC AACAGAGCTCAC---GATTTTCAAGTCGGTTTTGTGAGTCAAACA  
ATGTCGGTGCCGATGTTTCATTACGTGCAGCAACAGATGGAGAAATACTACGACATGATA  
AGC-----GTGAAAAGAAAAAGTTCACTAACTGGGTGAGGGGACTCCACCTGGCC  
TTGAGAGCCTACAAGGAGCTGCTACACACATTACTCGCCATGGACGCGAGCAAAGAT---  
CACACAGTCAGGGAATCCGCTAAAGTGTGAAGAGTAATATATTCTACGTAAGTAAAT  
AGAGAGTTCATACTGTCCATGTATCTCAATTACGATGAAAATAAAATGCCGAGATCATAT  
CTAGTGGATCTCGTGAAACGGTCCACCTTTTCTTAAAATGTTAGAGCATTACTGTAAG  
AGAACC-----GGTCTGGTTGTTTTCAGAAGAAGGTTTCAAAGAAGACAAAGGCCAAGAAA  
CAAAAGCCT--AAAATCAAACCGAAG-----GTCATTGAACTCTCGCCG

-----TGGGAAGAAATCCGCCCTCAGCTAGCCGCTGTGCTCAGT-----TCCGGGGTG  
-----GAGCGTTATCTACCACCGTTTACGCGGCGTCAGAGACACCGATA  
GATCAACAGAAGGAAGATTGTATGAAGAAAATTCAAAGGCTGATGAGGGATCACAAGTAC  
GAGGACGTCATAGGAACATTCAGAGCGGCCAGGGAAGTATGGCCG-----GAAGACGGT  
ATCTTTGGTGTGACGGTATGCCGGAAGACGAGGAAGTGGATATGTTAGAGACGATCTAC  
AATACTGACTTGGGTCTAGATTATGAGGTGGCCCAACATGAAGACGCCCAAGAATACTCA

-----  
-----GAAGACGAAGACGAGGAAGACGAGGAA

CAAGGCTCGGCCGCCATTGTTGAGACGGACTTTGATTTTCAAGACTTCGTAAGTTCGATTC  
TGTCATCCGAAGATAGTATCGGCGTGTGTTTGTCTGTTAGAGCGTTACGACAAGAACCGG  
TCGCACACAAACCACTGTATAGTGAAGATGCTACACAGAATAGCGTTCGACTGCAACCGA  
CCGGCTATGATGTTTCAAGCAACCTTATTCCTGACTTTTTCAGAAGATTCTGCACAAT---  
CCCATG-----CCACATTTGAAGGAGTTGAAAAGTTCCGCATATTTATTCTAAGA  
AAATTCGCTGATATAGCGTCTAAGAGCGGAAA-----GTTTTTATTGAA  
CTGTTATTTTGGGAAGAATTCTAAAGACGCCGTTGAAATCGAACACGGATAACAATCTGTAC  
AACGATCCCAGAGACAAGCTTGGTAAAGCTAGCTGGTCCGAGGAACAAGAAGACGAACTA  
CGTAACCTTTATATGGAGAATCAAACCAATCCACAGACGGATCAAGATGTTATTGATTGG  
ATACTCGATAATCTGATCGATCAAACCGAACACGTAGGTCCGTTATTAAGAAGCTGAAG  
GAATTGGGGCTCATATTTAACGCGCCGACCAAAAAGAGCAACAAGGCGAGAAGT---GAG  
AAAGTTACCAAAGATTTTACTGAAGAAGAAGACAACTACTCACGGAATTATGGACTCAG  
TATGCAGAGTCACAAGACCCTATGAGCGTTATAATGGAACGAATGCCACGAAACAGATCG  
AAACGAACATTCGTCGAGCGACTTCTACGATTAGGTTTGGATTGATGACAAGAAACAGTGT

CGCAAGAAAAGTATCAAG-----AATATATCGGGAAAGAACTCG  
TCGGATTCCGAATCATCTAAGTCC-----GAAGACGAAGACGCGCCT  
CCCAAAGGCCACCATTAAA-----ATAAAATCCAAGAAAACTTAACA  
AAA---AGCAAGCAATCTAATAAAAAGTCAGCTGAAAGCTTGGAAGTGGAGCGCTAATGAG  
ATCGCAGAACTGTTAGTGCAAGCTGTTGAAAACGGTCACACGGAGGCCCTAAATTGGTTG  
TCTGAAAATCTAGAAGAAGTAGCTTTGGACCAAGAGGCGGAAGGA---TTTGACCCAACC  
TCAGAAGGAACGCCATTAGTACCGATATCAAGAGAATCCGTTCAAGCCATACAAGATGAC  
TTATTTAGAAGAGTGCTAAAGAGTTTGGGGATAGTACCGCCGGTTGACGAACAAGAGACA  
TATTGGAGAATACCGAGCAGCTTGCATTATGAAACTATAAGA

>*Daphnia\_pulex*

ATATTTCTGTTGAACTTTCTGCGTGAAAGATGTCAAGTCGATCACTGACAAAGACCTAATC  
GTTCAACCGAACTTTGACTGATGGTAAACCCATCGATTTCCACCAGAACAAGACA---GGC  
AAAAGAAAAGCCAAAACCGGATGCCTCTGCCAGCTGCAAT-----  
-----GTGACACGCAAGTCGACCCTCTCCATTCGTTTAATGCTGAAAGAATTCTGT  
CTTCAAATGCTGAATGGCGCCTACAACCTCCCTGATGCACATCGTCAAAGACTGTCTGGTT  
CGTTTGA---ACCCAAGATCAC-----GATGAAACTTATTACTTATGGGCCGTTAAG  
TTTTTTCATGGAATTTAACCGCAATTGCGGTAAATTTCCGGTTCGAATTTGGTCAGTGAGACC  
ATGTCGATTGGGTTATTCCATTACATCCAGAACCAGGTTCAAACCTATTTCGGAATCAATT  
ACG-----GTAGACAAGAAGAAAGCTGCTCTGTGGTCCCGTCGCCTCAATGTCGCT  
CTGTGTGCCTACCAAGAGTTATTGATGACGCTCAACGCCATGGATAAATACGGCTCT---  
GAATCCATCCGCAATTCGTCTCGAGTCCTTAAAGCAACGTCTTTTATGTGCCAGAGTAT  
CGTGAGATGTGCCTCGTTTTGCTCCTCAACTACAAAGAAAATCAACACTCGCTGACTTAC  
CTGAAAGATTTGGTCGAAACCAATCACATCTTCTTGAACACTCTTTGAACAGTTTCGAAAG  
GGCAAT---CGTCATCTGGTCGTCCAGAACAAGTCAAAGTGCCCCAGAAGCGGAAGAAG  
AGCAAACCGAAGAAAAGAAGTCGGAG-----GAGGAAGAAACGCCCCCG  
CCAATTTTCGACGAGATTGCCGTAGAGATCAGCTCGGCCTTACAAGAAAACCTTCTTTA  
ACCGAC-----GACGTTGTTCCCTTTGACGCCGCCTCCGATCTCCCGATG  
GATGATCAAAGGGTTATAGCCATGGGAAAATCGTGAAACTGCTGAAAGAATCCAAATCC  
CATCTGGCTGTGGCTCTACTGCGGGCTTGTCTGTAAGTTTGGCCG-----GAAGGGGAA  
GTCTTTGGTGTCTCCTGAAGTGGGTCCAGAAGACGAGCTGCTTCTTTTACGCGAACTCTAT  
CATACCGAATTACCGATAGATGTTGCAGGGGAAGAGCCCAATGCCGAAAGCGAAGAAGAA  
GAT-----

-----GCTGACAACAAA-----GAAACGGAGGAAGAAGAAGAGGAG  
ATGTCGACAGTCAGAAGGAGTAAAAAGAACTTCAATTTGAAGAGTTTATTCGCAGATTC  
GCTCACAAAACGTCGTCAAAAGTTACTGCCATCTCTTGCAGAGTTACTCCACCAACACA  
ACTTTGACGAACCACTGCGTGATCAAAATTTCTCCACCGGATCGCCTTTGATTGTAATAATG  
CCGGCCATGATTTTCCAGCTGTCCATTTTCAAGACATTTCAAATAATCATGGACGATCCG  
CGGGCCAAA-----ACTGAAACTACTGAATTGTACAAGTTTGTCTATTTACATCATGAGA  
AAATTTGCGGAAACGGCACAAGTCAACCCGAAA-----ATCTTTGTGGAA  
CTGCTGTTCTGGAAGACGGCCCGGAGGCGGCCGAGATCGAAGTTGGTTACGGCAATGTC  
CAAGAC-----CCCTGCACGCGTTTTCGGCTGGAGCGAAGAGGAAGAAGATGAATTG

CAGCGGCTCCATCAAGAATTCAGAGACGTC---CAAGAAGGGGGAGACGTCGTGGATCGA  
ATCATGGCCAATCTGATCAATCAGACGCGCAGTCGACGAGTCATCATCAAGAAAATGAAA  
GAAATGGGTCTCATTATGGACGCCAAAAGCTTGGCTAAGACGAAACGATCCTCCAAAATC  
CGCCCGTCCAAAGAATGGACCGAACACGAAGTGGAGGAGCTGAGACGCATTTCCCTGAA  
GTCCGCGAATCATCAGATCCGCTTGAATGCTTATCGACCGGCTGCCCGTCCGTCGTGCC  
AAGAATCGCGTCCGCGAAAAAATCCTCGAGCTGGGCTGGTGGAAAGACGTCAAAGAGTTA  
CGAAAGAAACGTCCAGGTAAATCAGCCGGAAGCAAGGAATCGAACCGCGATGAATCGGAT  
TCAGAGGACGGCCGAGCCGAGCCAGGGAAGGACCTGCCGGACTGGGGGATTCCGAGTCG  
GACGAAAGTGAAGAGTCCGAC-----

-----GAAGGGAAAGCGACAACGAGCCTGTCAGCAAGACGAAG  
GAGCTCAAGACTCAACATCGACCCAAACAGTACGGCCGTAAAGAAGGCTTAGCCTGGTTG  
GTCGAGTGTCTGAGTGAAACCCTCGAGGATCGTGAAGATGGA-----GAAGGCGAT  
GAGGAGGCCATCCCTATAGTCCCGCTCACGGACATTTCCAACGACGCCATGGAGGACCAC  
ACTTTTTTGAAATTTATCGCCAAATTGGGATTGGCTCCACCCGCCAGCGAACAAGAGCAA  
TTCTGGCGTATCCCTTCCACATTGACTTCGGCTGATCTACGT

>Drosophila\_melanogaster

CGTTTCGGCGGAACCTATGTCATTCGGAACATGAAGTCCGTTTCGGATCGGGATGTGATA  
TGCCACCAGGCTCTGGAGCGCGTGTGCATCGATCGATTTTGACCGGAGAAGCAG-----  
CAGCAGAAGCGCTCCACCGACACATCCAGGAGGAGGCGCAG-----

-----GTGACCCGTCGCAGTGCCTTACCCTTAGATTGTGCCTGCGCGAATACTGC  
ATCGAGGTACTGCGCTCCGCTTACAACACTCTGGTGAGGCAGGTGCGTCGGGTGCTGGAA  
CGCAAC-----GCCGGATCGTCGAGTCACGATGACTCCTATCTATTGTGGGCCATACGA  
TTTTTTCATGGAGTTCATCGTTTGAAGT---GGTCTACAATTGCAGTTAGTCAGCGAATCG  
TTGAGCGTGCAATGCTTCCACTGGGTCCTGACGCGCATGCAACATGACATGGACATGATT  
GTG-----AGCGACAAGAAACAGGCGCGTCTCTGGGCCAAGCGACTGCATGTAGCG  
CTTTTGACATTCGGGAATTGCTCCAAAGCCTGCTGGCACTGCAGAAGCTAAAGGATGAC  
AACAACGCGCGAGCCCTTTTCGATATGTTATTGAACAACGTGTGCTATGTCTGGAGTAT  
CGGGAGACGGTGTGCTGATTTGTTAATGAACTACAATGAGGCGCACAGCACAAAGGTTTTT  
CTGCGCGATGTGGTGAAACGGCCAACGTTTTTCATTAATAATGATGGAGCGCTTCTGCCAG  
GACTCTGTGGTGGTGAAGACAAGAAGCGAGGTCGTGGCGCCTCCCGAAAGAAGAAGCAG  
GCGGCGACCAAGTCCAAGCCACCAGCT--GCACCACAGCCCACTGAGGAAGAATTGTGCG  
AGCAAATGGGCTGAACTGGCAACGGAAGTGTGCAGCCTGCTGTCCACGGAATTGGAAATG  
CCAGAG-----GATGAGCAGCCCCTGCCCTTCGATGCCGCATCCGAGAAATCCATT  
GATGATCAGCGCGAGGATTGCATGATTCGCATAAATAAACTGCTTCGTTCCGAGAAACTG  
GACCAGGCCATCGCCCTTCTTCGTGCTGCCAGGGAAGTTTGGCCG-----GAGAACGAA  
GTGTTCCGTGCAATTTCCGCTGCACCGGAAGACGAGCTGCTGCTCCTGCGTGAGATTTTC  
ATGTCCAACATTACAACAGTTGAGTCCGAGGATAAGGAAAACGAAAAGGACCAAAAAGCAG  
GACGAG-----

-----TACGAGGACGAAGACGACGACTTGGATAACGAAGAATACGAAGAG  
CAGGATAATGGACTCACC---GAGAAAACGTTCAAATTTGATGATTTCCGCTCGCAGATTG  
CTGAATCCGAAAATCGTTCGGGCTTGCACATTAGTGCTATCGGATTGGGCGGATATAACC

ACTCGATCTTTGAAAGCGGCCGTAAC TATTCTACATCGCATTGCCTACGGCTGCAAATGT  
GCGGGAATGCTTTTTTCAGGCCAAGCTGTTTCGCATCTTTCAACAAGTCTTCAGCGTGGA  
CGTGAC-----GTCCATCAGGAGGAGCTGCGCCGCCTGGCCATCTTTGTGGTGCCG  
AAATTTGTCGAGGTAGCCCCGACTAATCCCAA-----ATCTATGCAGAG  
TTATTATTTTACAAAGGCATCAGGGAGGCAAATGAGCTGGAGTCGGGCTATTGTGACGCC  
TACGAA-----GCTGGCACCAAAGGAGCCTGGACCGAGGAGCAGGAGTCGGAGCTA  
CGCTTCCTCTTCGAGGAGAACCAGCGCAATCCTGAAACAGATAAGGATGTGATTGATTGG  
ATTCTGGACAATTTGGTCGACAAGACGCGCAACCGCCGCACCGTCCTGAAGAAGCTGAAG  
GAACTGGGCCTGCTATTCAAGGCGCCACCAAGCGTTCGACCAAGTCCGCCAG-----  
AGCGGCAAAAACGTCTGGCAGCCGGAAGAGGATGACGAGCTAAGGAGCTTATATGATCAG  
CATCGCATTGAGCCGACTGCCTAGAGCGGCTTGTCAATGAGTTCGCTGAACGACGTAGC  
AAACAGCAGATCATCAAGCGAATGCTTCAGATTCATTTGATAGCGGATAAATCCGAGATT  
CTGCCCGCCAAAAGGGGCGTGGCAAAGACAAGCCAAAGAAAGACGTAGAAATGGAAGGC  
GAGGGCGATGAGTTTGATTTTGCC-----GAGGAGCCC  
ATGTTTGAGGACCAGGGGTAT-----AAGAAGCCGAAG  
TCCAAACCGAAAAAGTCCAGAAGCGTCAGATGGTACGCACACCCTTGGATGTAGGCACC  
ATTAGAGCTCTAATCGGTCAGGTGGATTCGGAAAAGTATCAATCGGCCATCGAGTGGCTG  
CAGGAATGCCTGCAAGACGCTAGC-----GAAGATACCGAGGAAGCAGTCGAGGAT  
GACGATGGTGTGCCTCTCCTGCCTCTAATGGAGAATCAAAAGAATGCCATGGAAGATGGT  
GATTTCCAAAAGGTCCTGGTCGCCCTGGGCATGCAGCCACCAATTTCCGGGAATGGAAGCC  
TACTGGCGTATTCTATATATCTGAACTCAGCCGATTTGATA

>Heliconius\_melpomene

CGCTTTGGTGGCACATATGTCATACAAAACATGAAGTCTATATCAGATAATGAGTTAATA  
TGTCTAAAACCATTAACAAAATATCTAATTTAGACTTCAATGGTAGTAAAAAGTCTAAG  
TTAGTTAGACCTAAGAATAGACGGCCTGTTGAAAGTGGCATA-----  
-----TTGGAAGGAGATCAGCTTTTGTATTAGATTATTTTTAAAAGAGTTTTGC  
ATAGAATTTTTAAACAGTTCATATAATCCTTTAATGCATTATGTAAAAGATGTGTTAGTG  
AGAGCTAAA---GCGCAACAAAAT-----GATGAATCATATTACTTGTGGGCTATGAAA  
TTTTTTATGGAATTCATAGAGGACAT--AATTTTCAAGTTGGATTAGTTAGCGAAACA  
ATGTCAGTACCGATGTTCCATTACGTACAACAACAAATGGAGAAATATTACGACATGATT  
AAA-----GTGGAGAAGAAGAAATTCTCCACTTGGGTGAGGAGACTACACCTCGCT  
CTTAGAGCTTATAAGGAACTACTAAATACATTACTTGCCATGGACAAAAGTAATGAT---  
ACAATGGTTAAAGAGTCCGCTAAGGTGTTGAAAAGTAATATCTTCTATGTGTTGGAGTAT  
AGGGAGTTTATTTTGTAGTATATTTTGAATTATGATGAGAGTAAGATGCCGAGATCATAT  
TTAGTAGATTTGATAGAAACAATTCATTTGTTCTTAAAATGTTAGAGCACTATTGTAAG  
AAAACA-----GGGTTGGTGGTCCAGAAAAAAGTTCCGAAAAAGACCAATCTAAAAAA  
CAAAAACCACGTGCTTCCAAGCCGAAA-----CCGATACAAATATCGCAA  
-----TGGGAAGAAGTTAGGCCTCAAATAGCCGCAGTAATGAAT-----TCCGGTATA  
-----GAAGAGTACCCGCCGCGTTCGACGCAGCCTCTGACGTGCCTATT  
GATCAACAAAAGGAGATTGTATGAAGAAAATACAAAATTAATGCGGGACCACAAATAT  
GAAGATGCCGTCCGTACATTCCGAGCCGCGAGGGAAGTGTGGCCT-----GAAGAAGGT

ATATTTGGTGCAAGCGATATCAAAGAAGATGAAGAAGTGGATATGCTCGAGACTATTTAT  
AACACGGACTTGGGAGTAGACGTTGGGACAGTAGAA---GAAGATCCGCAAGAAAATTCA  
GAT-----  
-----TATGATGAAGATGATGAAGAAGACGAAGAA  
GAAAAGTCGACAGCTGTTGTTGAAACAGACTTTGATTTTCAAGACTTCGTTCTAAGGTTT  
TGCCATCAGCGAGTAGTAAGCGCGTGTGTCTGTCTGTTAGAGCAATACCACAAGAACTTA  
CCATACACAAACCATTGTATAATTAAGATGCTGCACAGAGTCGCGTGGGACTGCAACCGA  
CCCGCCATGATGTTTCAGGGCACGTTGTTCTTGATATCCAAAGGGTGTGAATAAT---  
CCTGTT-----CCTTTATTTAAGGAATTGGAAAAGTTCGCCATATTTGTTCTAAGG  
AAATTTCGCTGAAATGGCATCGAGGAGTAGCAA-----GTTTTTATCGAG  
CTGTTATTTTGGGAAGAACTCTAAAGATTCTGTGGAAATCGAACACGGTTACGACCTCTAC  
AACGATCCCAGGATAAGCCGGGCAATGCGCAGTGGACTGAGGAACAGGAGGAGGAACTT  
CGGAAACTTTACATGGAAAATCAAACCAACCCTGAAAATGATCAAGATGTAATCGACTGG  
ATACTAGAAAATTTAATAGTACAAACTCGCACTCGTAGAAGTGTATCAAAAACTTAAA  
GAACTAGGACTTATATTCAATGCGCCAATAAAAAAGCAATAAAGAGAGGAAG---GAA  
AAAGTGCTTTGGGATTTACTGAAGAAGAAGATAATATTTTGACGGAACTTTGGGAAGGAA  
CATGGGGAGAGTAAGGATGCACTAGATACAATAATGACCAGAATGCCTAACAAACGTTCT  
AAACGAAGCCTCAAAGAGAGACTCACAGAAGTGGTTTGGTACAAAGTAAGCGCAAAAAG  
AAAGAAGCTTCTAAACGCGAT-----AATAAATTGAACGAAAGTACA  
TCGGATTCAGAAAATTCTAGCTCA-----GATAACGAGGACGCT---  
-----AGGCCAAACTTAAT-----ATAAAACCAAAGAAAAACCGAG  
AAA---CAAAGTAAA---AATAAAAGACAAACGAAAAGTATGGAATTAAGTGCTAATGAA  
ATTGCGAAACTGTTGGTTCAAGCTGTTGATAATGAATTAACAGAAGCATTAAATGGTTA  
GCGGAAAATCTAGAAGAAGTAGCCCTAGACCAAGAGGCTGAAGGC---TACGATCCTAAT  
GCCGAAGGAACTCCCATAGTGCCGATATCTCAAGAATCCATCGAGGCCATGGGGAAAAAG  
TTGTTTATTAAGTGTTAAAAAGTATTGGAGTTGTACCACCTGGGGATGAACAGGAACT  
TACTGGAGAATACCTAGTAACCTTACATTTTGAACTATACGC

>Harpegnathos\_saltator

CGATTTGGCGGTACTTATATTGTGCAAAATATGAAAGCCACCGGAGAAAATCAAATGATA  
TGTCACAAACCATAACCAGAAGATTGAAGCTTTAGAATTTGGCCACAACAAGAAA---AGA  
ATAAAACGACGCAAAGACAAAATAGGCCTACAAGACGCTAAA-----  
-----GAGGAACGTATGTCTGCTCTTAACGTACGACTTTTCCTCAAAGAATTTTGC  
GTAGAATTCCTTGAGCGGAGCTTACAATCCCGTGATGAGATTCCGGTAGATCTTGCATCATC  
AACGGCATTCATGGTGACGTATCT-----GAAACGGTTTCCTATCTGTGGGCCTTACGT  
TTCTTCATGGAGTTCAATCGCCATTAC---AAGTTCCAAGTGAAATATGTGAGCGAACT  
ATATCCACGGGAGTATCCACTTAGTACAAAGACAAATGGACCAATATTACGAGATGATT  
CTC-----ACTGATAAAAAAGAATACCGGCTTGGTCACGTAGATTGCATGTAGCA  
TTAAAAGCATATCAGGAACTTCTTAATACTTTAATGGCAATGGACAAGAGTGCAGAT---  
CACAGTGTTAGAGAGTCCAGCAAAATAATTAAGTAACATCTTTTATGTTCCGGAATAT  
CGTGAACGATGCTGTGTCAATTTTTATATTACGATGAGAATAAGATGTCACGACGCTAC  
TTGGTGGATCTTGTGACTACTGTTTCATATATTTCTGAAAATGCTGGAATATTTCTGTGAG



AAGGGTCAACGTCATCTAATAGTTCAAAAAGTGAAGCCCAAGAGGCAGAAGGTCAAGAGG  
CGGAAAAAGCCTTCTCACAAGGAT-----ATAACTCCGACTGCTACTTTGGAA  
GAACGCTGGGACACAGTTGGTCCCGAAATATCCGCTGTGATACAA-----GGTGGCAAC  
-----ATACCAGAGGTGATGCCGTTTGTGCAACTTTAGAGACACCCATA  
GACGATCAGAAAGCAGACGCCATGAAGAGAATCCAGAAATTAATGCGGCAGGAGAACTTG  
GAGCAGGCGGTTGGTCTTCTACGTGCAGCAAGAGAGATCTGGCCT-----GAAAATGAC  
TGCTTTGGTAGAGTGAACATACCCCGGAGGAAGAGTTTCTGGCTTTACGTGAAATCTTC  
TTCGCAGACCTGGGCGATGAGAGCGAG-----

-----GAGGACGATGAGGAGGAGGAGGAGGAGGAG  
GAAGGGGAACTATTTTCCAGGAGACTGATTTTAAATTGGACGAATTTATTCAAAGGTTC  
GCTAATGTAAAAGTGGTTAGAGCTTTGGCGCTACTACTGCAACAATTCGAGAGCAATACG  
GTCGAGGTAAACCACTATGTAGCCAAAATGTTACATCGAATTGCTTGGACCTGCAAAATG  
CCGGGCATGATATTCCAGGCGTCCATCTTTCGACTTTTCAAAGAATCCTTGATTCA--  
GAGAAT-----CCTGCACACAAGGAGCTGCAAAAAGTTCGCGGTCTTCATAATCCGT  
CGTTTCGTCGAAGTCGCCAGAAAAACCGGAAG-----TCGTACATGGAG  
CTGCTCTTCTGGAAGACCAGCCGCGACGCGACAGAAATCGTGGATGGCTACAGCGCAGAA  
ACGACT--AACAAGAAAGTTTCACGAGCAGTCTGGACTGAGGCGGAAGAGGACGAGCTG  
CGTACCCTCTTCATGGAGCATCAGACTAAC---AAATACTCCAGGACTTGATTGACTGG  
CTGCTGCAACATATCATCAGTGAGGACAGGACGCGGCGTACCGTCATCAAGAAGCTCAAA  
GAGATGTATCTGATCGTGAACTCTAAGGGCGTGCAGCCGAGGTACAAAAGAGG-----  
--TTGCCTAAGGAGTGGTCTGAAGAAGAAATCGCCAACTTACCGAACTTTGGACGCAG  
TTCAAAGAGGACGACGATCCCGTGGATTTGATTTTCACCGGTCTTAGAATAAAGCGGCCG  
AAGCTGAAGATCAAGGAGAAGCTTTTGGAAATTAGGACTCGCGCTGGATCGCAAGGAACTG  
CGCAAAAAGCGAGCTAGAAGAAGCAGCCAGGGTAAATCGTCGTGGGAAACGCAAGCTGCC  
AGTAATTCTGACGGGAACGAAAGTTCAGCCACCGAC---GAAGACGGAGAAGAACTCGA  
AAATCCTCGAAGCGCGACGGC-----GGCGGTCTCGACCGAGCAAACCG---GCG  
AAAAAGAAGCAGCGAAACAGGAGGAAGCTACCGACG---ATCGTTTACACGGATGCACAA  
TTATTCGGTCTCTTGAAGGACGTCATCGACAAGGACATGAAGGAGGCGTTGGAATGGATC  
AAGGAATCCTTGCAAGATATCCTGGACGATCGTGAC-----GAGGAGAGC  
TTCGAAGGCATACCTTGGTGCCGCTGACAGATTATTCGTGCGCCGCGATGGATTCCGCC  
AGTTTTCAAAGCTCCTTCGCGCCATGGGATTTGTACCACCGGCTGATGCCCAAGAATCT  
TATTGGCGGTCCAGCGAATATGCTTACGAGCAGATTCAA

>Linepithema\_humile

CGATTTGGCGGTACTTATGTTGTGCAAAAATATGAAAGCCATTGGAGAAAATCAAATGATA  
TGCCATAAACCATATCAAAAAATTGAAGCGCTAGAATTCGGTCACAATAAGAAA---AGA  
GTAAAGCGACGCAAAGACAAAATCGGTCTACAAGATACGAAA-----  
-----GGGGAGCGTACATCCGCTCTTAGCGTGCGGCTCTTTCTAAAGGAATTTTGC  
GTAGAATTTCTTAGCGGTGCTTACAATCCTGTGATGAAATTCGCTAGATCTTGCATTATT  
AATGCTGTTTCATGGCGAAGCGTTC-----GAAACGACTTCCTATTTGTGGGCACTACGT  
TTTTTCATGGAATTCATCGCCATTAC---AAGTTCCAAGTGAAATATGTTAGCGAAACT

ATATCCACCGAAGTATTTTCATTTAGTACAAAGACAAATGGAAGAATATTACGAGATGATG  
ATA-----ACTGATAAGAAAAAGATACCGCTTTGGGCTCGTAGGTTGCATTTAGCG  
TTAAAAGCGTATCAGGAACTTCTTAACACTCTTATAGCAATGGATAAAAAGCACAGAT---  
GACGGTGTAGGAAATCTAATAAAATAATCAAAAAGCAATATTTTTTACGTTCCGGAATAT  
CGGGAACAATATTCTCTCAGCTTTTATGCTTCGATGAAACTAAAATGTCACGGTTATAC  
TTAGTAGATCTAGTGACGACTGCTCACATATTTCTGAAAATGCTTGAGCATTTTTTGCCAA  
AAAGGCCAACGACATCTCATAGTTCAAAAAGTGAAGCCAAAGAGGCCAAAAGCTAAGAAA  
CGAAAGACAGAGTCTGCTCAAAAAGAAAT-----GTAATTCGGCTCTTCTACGTTGGAA  
GAACGTTGGGACGCTACCGGTCCTGAATTATCTGCTGTAATGCCA-----GATGCTGTT  
-----ATACCGGAAATGATACCGTTCGATGCAACTTTAGACACGTCGATT  
GACGATCAGAAAACGGACGCCATGAAGAGAATCCAGAAATTCATGCGGCGGAAGAACTTG  
GAACAGGCGGTGGGTCTTACGTGCAGCAAGAGAAATCTGGCCT-----GAGAACGAT  
TGCTTCGGAAGAGCGGATATATCGCCGGAGGAGGAATTTTTAGCTCTTCGCGAAATCTTC  
TTTGACAGACCTGGGCGACGACGAAGAA-----

-----  
-----GACGATGAAAATGAGGAAGAAGAAGAAGAAAGA  
GAA-----AGTGTCTCCAAGAGACTGACTTTAAATTTGGATGAATTTCTTCAAAGGTTT  
GCCAACGTGAAGATCGTCAAAGCTTTAGCACTGTTACTACGAGAGTTGAGATAAATACG  
ATCGAAATAAATCACTACGCAACAAAATGCTGCACCGGATTGCTTGGGATTGCAAAATG  
CCGGGCATGATATTTCCAAGCATCCATATTTTCGGATTTTTCAAAGAGCTCTCGAGTCA---  
AAGGAC-----CCTGCGCATAAGGAGCTCCAAAAGTTCGCGGTCTTCATAATCCGC  
CGTTTCACCGAAGTCGCCAGAAGAACCGGAAG-----TCGTACATGGAG  
CTGCTCTTCTGGAAGACCACCCGCGACGCGACAGAAATCGTAGATGGATAACAACGCAGAA  
CCGACT--ACAAGAAAGTTTCGCGAGCAGTCTGGACGGAGGCGGAAGAGGACGAGCTG  
CGTACTCTCTTCATGGAACATCAGACTAAC---AAATACCCGCAAGATTTGATCGATTGG  
TTACTGGAGCACCTCATTAATGAAAATAGAACGCGCCGTACCGTCATTAAGAACTCAAG  
GAAATGTGTTTTGATTGTCAATTCGAAGGGTGTGCGAGCGGAGATACAAAAGAGG-----  
---TTGCCTAAAGAATGGTCTGAGGACGAAATCGCCCAACTTACGGAACTTTGGACACAG  
CTCAAAGACGATGACGATCCCGTGGATTTGATTTTCACCGGTCTCAGAATAAAGCGATCG  
AAGCCGAAGATCAAGGAGAAGCTTTTGAATTAGGATTGGTGCAGGATCGCAAGGAGCTG  
CGCAAAAAGCGAGCTAGAAAAGTAACCAGGGTAAATCGTCGTGGGAAACGCAGGCTGCC  
AGTAATTTCTGACGGGAACGAAAGTTCAGCCACCGACGACGAAGACGGCGAAGAACTCGA  
AAATCCTCGAAGCGC-----GGCGATGCGCCTCCGAGCGAGTCG---ATG  
AAAAAGAAGCAGCGGAACAAGCGGAAGCTAGCGACG---ATCGTTTACACGGATGCACAA  
TTATCTGGTCTCTTGAAGGACGTCATCGACAGGGATATGAGAGAGGCGCTGGAATGGATC  
AAGGAATCTCTGCAAGACGTTCTGGACGATCGTGAC-----GAAGAGAGC  
TCGGAGGGCATAACCTTGGTGCCACTGACAGATTACTCGGCGACCGGATGGATTACCG  
AGTTTTCAAAGCTCCTCCGCGCCCTGGGATTTGTGCCACCGGCTGATGCCAGGAATCT  
TATTGGCGTATTCGGCGAATATGCTTACAATCACGATCCAG

>Megachile\_rotundata

CATTTTGGCGGCACGTACGTCGTCCAGAATATGAAAGCTATCGGAGACAATCAGCTGTTA

TGTCACAAGCCCTATCAGAAGATCGAAGCTCTGAATTTTGGCAGAGACAAGAAA---AAA  
ATGGCAATACCGAAAAATAAACGGCCTATGAAAGACCCAGA-----  
-----AGCGAACGTTTATCTACGCTGAGTGTGAGGCTGTTTTTGAAGGAGTTTTGC  
GTTGAATTCTTGAATGCCGTTATAATCCTGTGATGAAATTCGCAAGATCCAGTATTGTC  
GGCGCAAATCATCCAGATCCGTCT-----GAATCTGTTTGTATCTTTGGATTATGCGG  
TTTTTCATGGAATCAATCGACATTAT---ACGTTTGAAGTAAAATATGTCAGCGAAACA  
ATATCTACGGAAACATTTTACCTAGTGCAAAAACAGATGGACCATTACTACGAGATGATG  
ACC-----GTCGATAAAAAGAAAATTCAGTTTGGTCTCGCAGATTGCACATAGCA  
TTAAAAGCTTACCAGGAACTTTTGCACACTCTGATAGCGATGGATCAAAGCAAGGAC---  
CGTGGTGTTCGCGAATCCAGCAAAGTTATCAAAGCAACGTGTTCTATGTACAAGAATAT  
CGAGAAACGGTGTCTCTCGCAACTGCTTTGTTTCGACGAGATCAAATGTCACGACAATAT  
TTGATTGATCTACTAACGACAGCGCATATCTTTCTGAAAATGCTGGGCCATCACTGTGGA  
CACAAAT---CGCAGTGTGATTGTTCAACAAGTGAAGCACAAACGTCACAAGAGTGGG---  
CATAAGAAAAAACTGTGCAGAAA-----GAACAAGCTCCTCCTCGAAGTTTGGAG  
GAACGTTGGGACGAAATTAGTCCACAATTGTCAATCGTAATGCGA-----GAGGGAACA  
-----ATACCTGAAGTTGTGCCATTTGATGCGACCTTGGATACACCTATA  
GAAGATCAAAAAGTCGATGCTATGAAGAAAATACAGAAGTTGTTGCGATCGAAATCTTTG  
GAACAAGCAGTTGGCCTTCTTCGTGCAGCAAGGGAAGTTTGGACC-----GAAAACGAC  
TGCTTCGGCAAAGCTGATATTACGCAAGAGGAGGAGTTCCTAGCACTGCGGGACATTTTC  
GTTGCAGACCTGGGCGTGGTCAAGAAGATCCCGTCACACAAACTGACTCAACTCAA---  
CAAGACACCATTGAAACT-----  
---CTACTCAATGACGATCCA-----GGTAGTGAAGATGAAGACGAGGAGGATGAATCC  
GAACCACGTTCTGTTGCGGTGGAATCGGATTTTCAGTTTCCCTGACTTCGTTACAGATTT  
GCCAACGTGAAAGTTGTTAGAGCTTTGCTGATCTTGCTACGACAATTTGATAAGAACT  
GATGAAGTAAACCATACGTTAACAAGATGCTTCATCGAATTGCTTGGGATTGTAAAATG  
CCTGGAATGATGTTTCAAGCATCGATGTTCCGTGTTTTTCAGAGAATACTTGAGTCT---  
AAGCAT-----CCTGCTCATAAGGAAC TTCAGAAGTTTGGCATCTTCATAATTCCG  
CGTTTTATCGAAGTCGCGCAGAAAACCGGAAA-----GCGTACATGGAG  
CTGCTTTTTTGAAGACCACTCGAGATGCGGCTGAAGTCGTTGACGGTTATAACGCAGAA  
ACGGAT--ACAAGAAACCTCCACGAAGCTTCTGGACCGAGGCCAAGAGGACGAGTTA  
CGCACCTCTTTATGGAACATCAGACTAAC---AACTATCCCCAGGATGTCGTGATTGG  
ATATTGAAAAACATTAATCAAGAA--CGAACACGACGTGGCATCATAAAAAAACTGAAA  
GAATTGTGTTTGTATCGTCAATTCTAAGAGTGTTCGAAGCGAAGTTCAAAGAGG-----  
---CTGCCAAAAGAGTGGTCCGAGGAGGAAGTCGCTCAGCTAACGGACCTCTGGGAGCAA  
CTAAAAAATGACGAAGATCCCGTGGAGCTGATCTTCAATGGGCTTACAATAAAGCGGCCG  
AAGCCAAAGATCAAGGAGAAGCTTTTGAATTAGGATTGGCCACGGATCGTAAGGAGCTG  
CGCAAGAAACGATCCAAAAAAGCAACCACGGTAAATCGTCGTGGGAAACGCAGTCTGCT  
AGTAATTCGGAAGAGGATGAAAGC-----AGCGACGAAGAAGCTGGA  
AAATCCTCGTCCCGTAAGAAC-----ACGGCTTCCAATAAACCGACCGGT  
AAAAAACAAGGCCAGCAAGAAGAAGCAGCCAAC---ATAGTCTACACGAATGCACAA  
TTATCTGGGCTGTTGAAGGATATTATCGAAAAAGATATGAACGAAGCACTTGAATGGCTG

AAGGAATCCTTACTGGATGTTCTGGACGATCGAGAC-----GAGGAAAGC  
TCCGAAGGTATCCCTTTAGTCCCTCTGACAGATTATTCGTCAGCCGCGATGGATTCACCG  
AGCTTTCAAAAGCTTATTCGAGCTATGGGATTCACACCTCCTGCTGATGAACAGGAATGT  
TATTGGCGCATACCATCTAATATGCTTAATTCGACGATTCAG

>Nasonia\_giraulti

AGGTTCCGGTGGTACCTACGTCGTGCAGAATATGAAGGCGATCGGGGACAACGAGATGATC  
TGCCACAAACCTTATCAGAAAATTGAGGACCTAAACTTTAGCGTTACAAAGCAA---AAA  
ACGAAAAAGCGGAAGAACAAGAACGAGCTGATGAGCCTCGGC-----  
-----GAGGAGCGCATCTCAGCCCTCTCGGTCCGGCTCTTTCTCAAGGAGTTCTGC  
GTGGAATTCTTGAACGGCGCCTACAACCCTGTGATGCGCTACGTCCGGTCTTGCATCAAC  
GGCACCGGC---GCCGTCGCCTCC-----GACGCTAGTCACTACCTCTGGGCTCTGCGC  
TTCTTCATGAACCTCAACCGCCATTAC---AACTTTCGCGTGAAATACGTGAGCGAAACT  
ATATCCACGGAAGTGTCTATCTCGTGCAAAGGCAAATAGAACACAATTATGAGATGATC  
TTG-----AGTGATAAAAAGAAAGCGGCTTTCTGGTCAACGAGGATGCACTTGGGT  
ATCAACGCCTATCAGGAGTTGCTGCTTACTTTGATCGAAATGGACAAGAGCAAAGAT---  
GACGGAGTGAACGATCCAGCCGCGCCATAATGGGAAATATCTTCTACGTGCCAGAGTAC  
CGGACACGATACTCTCCAGCTACTCAACTACAACGAGTTAACAATGTCAAGGGATTAC  
TTGGTGGATCTCGTAACTACCGTACACATCTTCTTGAAGATGTTGAAGAACTTTTGCGAG  
AAGGAG---CGAACGTTGTGCTACAGAAAGTGAAA-----CGAAAGAAGCCGAAGAAA  
AAATCGAAGTCCGGCAACAAAGCAGCAACACAGCCTGCGGCATCACTGCCAAGCCTGGAA  
GAGAGGTGGGACGACGTGGGGCCGGAAGTATCGGCCGTTATGCAG-----CAGAACGAA  
-----ATACCGGTAGTGGCACCTTTTCGACGGTGCAAGCGAGATTCCCATA  
GACGATCAGAAGGGCGACGCGATGAAGAGGATCCAGAAGCTGCTGCGCTGCAAGGACTAC  
GAGCAGGCGATCGGACTTCTGCGCTCGGCAAGGGAAGTCTGGCCG-----GAGAACGAC  
AGCTTCGGCAAAGCCAACCTATCCGTGGAAGAAGAGTTCCTGGTGCTGCGGGAGATCTTC  
TTCGCCGAGCTCGGT-----

-----  
-----GACGAGGAGGACGACGACGAAGAGAACGAAGAGGAG  
GAGGAGGAGACGCGTTTCGAGGAAACGAGCTTCAAGTTCATGGATTTCTCCAGCGATTC  
GCAAACCTTGAGGGTGGTGAACCTGGCCATCCTCCTGAAGAACTTCGAGAGGAACACA  
CCGGAGCTCAACCACTACGTTCTCAAATGTTCCACCGGATTGCCCTGGACTGCAAAATG  
CCCGCTATGCTGTACCAGGCTTCTATATTCCGCGTCTTCCAGAGGGTCTTCCAGTCC---  
GACAGC-----CGAGTTCACAAGGAATTAGCGTCGTTTCGCGCGCTTTGTGTTCCGC  
GGCTTCGTGGAAGTGGCTTCGCGCAATCCCAAG-----GCCTACATGGAG  
CTGCTGTTCTGGAAGTCGACGAAACAGGCGACGGAGATGGTGGACGGCTACGACGCGGAG  
CCA-----CAGGCGAAGAAGTCGAAGAGTGCCTGGTCCGAGGAGGAGGAGGACGAGCTG  
CGGACCCTCTTTATGGAGCATCAAACAAAC---AAACCCAGCCAGGACGTGGTCCGACTAC  
ATTCTCAGCAATCTGATAAGCCAGGATCGCACGAGGCGAGGAGTCATGAAGAAGCTCAA  
GAGATGTACCTCATCGTCAATTCCAAG-----

-----  
-----

-----  
-----AATGCA  
TCGGCCAGTGAGGATGAGGATGGTTCGGGCTCTGACGAGGACGAGGATGGCGATGGCGGA  
GTAAGCGGATCCGATGTGGGA-----AAGAAGAAAAAGAAGAAGGAAAA  
TCGAGGAAAGAGAGGAAGAAGTCCAACAGCCGGCG---ATCGTTTACACCGACGCTCAG  
CTATTCGGATTATTGAAGGACGTCATCGCTAACAACTTGCAAGAGGCGTTGCAGTGGCTT  
AAGGAGTCACTGGAAGAGTCCCTGGAGGACCGCGAC-----GAGGAGAGC  
CACGAAGGCTTGGCGCTCGTGCCGCTAACCGCTGAGACGTCAGCTGCGATGGACTCACCG  
AACTTCCAGCGCTTCTTAGAGGCGCCGCATTGAGCCACCA---GATCTCGAGGAGCT  
TATTGGCGCATACCCGCGAGTATGCTGGTGACTACCGTCAA

>Nasonia\_longicornis

AGGTTCCGTGGTACCTACGTCGTGCAGAATATGAAGGCGATCGGGACAACGAGATGATC  
TGTCACAAACCTTATCAGAAAATTGAGGACCTAAACTTTAGCGTTACAAAGCAA---AAA  
ACGAAGAAGCGGAAGAACAAGAACGAGCTGATGAGCCTCGGC-----  
-----GAGGAGCGCATCTCAGCCCTCTCGGTCCGGCTCTTTCTCAAGGAATTCTGC  
GTGGAATTCTTGAACGGCGCCTACAACCCTGTGATGCGCTACGTCCGGTCTTGCATCAAC  
GGCACTGGC---GCCGTGCCTCT-----GACGCTAGTCACTACCTCTGGGCTCTGCGC  
TTCTTCATGAACTTCAACCGCCATTAC---AACTTTCGCGTGAAATACGTGAGCGAAACT  
ATATCCACGGAAGTGTCTATCTCGTGCAAAGGCAAATAGAACAATTATGAGATGATC  
TTG-----AGTGATAAAAAGAAAGCGGCTTTCTGGTCAACGAGGATGCACTTGGGT  
ATCAACGCCTATCAGGAGTTGCTGCTTACTTTGATCGAAATGGACAAGAGCAAAGAT---  
GACGGAGTGAAACGATCCAGCCGCGCCATAATGGGAAATATCTTCTACGTGCCAGAGTAC  
CGGACACGATACTCTCCAGCTACTCAACTACAACGAGTTAACAATG-----GATTAC  
TTGGTGGATCTCGTAACTACCGTACACATCTTCTTGAAGATGTTGAAGAACTTTTGGCGAG  
AAGGAG---CGCAACGTTGTGCTACAGAAAGTGAAA-----CGAAAGAAGCCGAAGAAA  
AAATCGAAGTCCGGCAACAAAGCAGCAACACAGCCTGCGGCATCACTGCCAAGCCTGGAA  
GAGAGGTGGGACGACGTGGGGCCGGAAGTATCGGCCGTTATGCAG-----CAGAACGAG  
-----ATACCGGTAGTGGCACCTTTTCGACGGTGCAAGCGAGATTCCCATA  
GACGATCAGAAGGGCGACGCGATGAAGAGGATCCAGAAGCTGCTGCGCTGCAAGGACTAC  
GAGCAGGCGATCGGACTTCTGCGCTCGGCAAGGGAAGTCTGGCCG-----GAGAACGAC  
AGCTTCGGCAAAGCCAACCTATCCGTGGAAGAGGAGTTCCTGGTGCTGCGGGAGATCTTC  
TTCGCCGAGCTCGGT-----

-----  
-----GACGAGGAGGACGACGACGAGGAGAACGAGGAGGAG  
GAGGAGGAGACGCGTTTCGAGGAGACGAGCTTCAAGTTCATGGATTTCTCCAGCGATTC  
GCAAACCTTGAGGGTCGTGAGCAACCTGGCCATCCTCCTGAAGAACTTCGAGAGGAACACA  
CCGGAGCTCAACCACTACGTTCTCAAATGTTCCACCGGATTGCCCTGGACTGCAAAATG  
CCCGCTATGCTGTACCAAGCTTCGATATTCCGCGTCTTCCAAGGGTCTTCCAGTCC---  
GACAGC-----CGAGTTCACAAGGAATTAGCGTCGTTTCGCGCGCTTCGTGTTCCGC  
GGCTTCGCGGAAGTGGCTTCGCGCAATCCCAAG-----GCCTACATGGAG  
CTGCTGTTCTGGAAGTCGACGAAACAGGCGACGGAATGGTGGACGGCTACGACGCGGAG

CCA-----CAGGCGAAGAAGTCGAAGAGTGCCTGGTCCGAGGAGGAGGACGAGCTG  
CGGACCCTCTTTATGGAGCATCAAACAAAC---AAACCCAGCCAGGACGTGGTCGACTAC  
ATTCTCAGCAATCTGATAAGCCAGGATCGCACGAGGCGAGGAGTCATGAAGAAGCTCAA  
GAGATGTACCTCATCGTCAATTCCAAG-----

-----  
-----  
-----

-----AATGCA  
TCGGCCAGTGAGGATGAGGATGGTTCGGGCTCTGATGAGGACGACGATGGCGATGGCGGA  
GTAAGCGGATCCGATGCGGGA-----AAAAAGAAAAAGAAGAAGGAAAAA  
TCGAGGAAAGAGAGGAAGAAGTCCAAACAGCCGGCG---ATCGTTTACACCGACGCTCAG  
CTATCGGGATTATTGAAGGACGTCATCGCTATCAACTTGCAAGAGGCGTTGCAGTGGCTT  
AAGGAGTCACTGGAAGAGTCCCTGGAGGACCGCGAC-----GAGGAGAGC  
CACGAAGGCTTGGCGCTCGTGCCGCTAACCGCTGAGACGTCAGCTGCGATGGACTCACCG  
AACTTCCAGCGCTTCTTAGAGGCGCCGGCATTGAGCCGCCA---GATCTCGAGGAGGCT  
TATTGGCGCATACCTGCGAGTATGCTGGCGACTACCGTCAA

>Nasonia\_vitripennis

AGGTTCCGAGGTACCTACGTCGTGCAGAACATGAAGGCGATCGGGGACAACGAGATGATC  
TGCCACAAACCTTATCAGAAAATTGAGGACCTGAACTTTAGCGTTACAAAGCAA---AAA  
ACGAAGAAGCGGAAGAACAAGAACGAGCTGATGAGCCTCGGC-----  
-----GAGGAGCGCATCTCAGCCCTCTCGGTCCGGCTCTTTCTCAAGGAGTTCTGC  
GTGGAATTCTTGAACGGCGCCTACAACCCTGTGATGCGCTACGTCCGGTCTTGCATCAAC  
GGCACCGGC---GCCGTGCGCTCC-----GACGCTAGTCACTACCTCTGGGCCCTGCGC  
TTCTTTCATGAACTTCAACCGCCATTAC---AACTTTCGCGTGAAATACGTGAGCGAAACG  
ATATCCACGGAAGTGTCTATCTCGTGCAAAGGCAAATTGAACACAATTATGAGATGATC  
TTG-----AGTGATAAAAAGAAAGCGGCTTCTGGTCAACGAGGATGCACTTGGGT  
ATCAACGCCTATCAGGAGTTGCTGCTTACTTTGATCGAAATGGACAAGAGCAAAGAT---  
GACGGAGTGAAACGATCCAGCCGCGCCATAATGGGAAATATCTTCTACGTGCCAGAGTAC  
CGTGACACGATACTCTCCAGCTACTGAACTACAACGAGTTAACAATGTCAAGGGATTAC  
TTGGTGGATCTCGTAACTACCGTACACATCTTCTTGAAGATGTTGAAGAACTTTTGGCAG  
AAGGAG---CGCAACGTTGTGCTACAGAAAGTGAAA-----CGAAAGAAGCCGAAGAAA  
AAATCGAAGTCGGCGAACAAGCAGCAACACAGCCTGCGGCACCACTGCCAAGCCTGGAA  
GAGAGGTGGGACGACGTGGGGCCGGAAGTATCGGCCGTTATGCAG-----CAAATGAG  
-----ATACCGGTAGTGGCACCTTTTCGACGGTGCAAGCGAGGTTCCCATA  
GACGATCAGAAGGGCGACGCGATGAAGAGGATCCAGAAGCTGCTGCGCTGCAAGGACTAC  
GAGCAGGCGATCGGACTTCTGCGCTCGGCAAGGGAAGTCTGGCCG-----GAGAACGAC  
AGCTTTCGGCAAAGCCAACCTATCCGTGGAGGAGGAGTTCCTGGTGCTGCGGGAGATCTTC  
TTCGCCGAGCTCGGTGTTCCGGACGAGGTGCCTGGGACTCAGGGCAGTGGTAATCAG---

-----GTC-----

---GAGGGTCTGCTGAACTACGAAGACGAGGAGGATGACGACGAGGAGAACGAAGAGGAG  
GAGGAGGAGACGCGTTTCGAGGAGACGAGCTTCAAGTTCATGGATTTCTCCAGCGATT

GCAAACCTTGAGGGTCGTGAGCAACCTGGCCATCCTCCTGAAGAACTTCGAGAGGAACACA  
CCGGAGCTCAACCACTACGTTCTCAAATGTTCCACCGGATTGCCCTGGACTGCAAATG  
CCCGTATGCTGTACCAGGCTTCGATATTCGCGTCTTCCAGAGGGTCTTCCAATCC---  
GACAGC-----CGAGTTCACAAGGAATTAGCGTCGTTTCGCGCGCTTCGTGTTCCGG  
GGCTTCGCGGAAGTGGCTTCGCGCAATCCCAAG-----GCCTACATGGAG  
CTGCTGTTCTGGAAGTCGACGAAACAGGCGACGGAGATGGTGGATGGCTACGACGCGGAG  
CCA-----CAGGCGAAGAAGTCGAAGAGCGCCTGGTCCGAGGAGGAGGAGGATGAGCTG  
CGGACCCTCTTTATGGAGCATCAAACCAAC---AAACCCAGCCAGGACGTGGTCGACTAC  
ATTCTCAGCAATCTGATAAGCCAGGATCGCACGAGGCGAGGAGTCATGAAGAAGCTCAA  
GAGATGTACCTCATCGTCAATTCCAAGGTATTATAC-----

-----TCG

GTCATCGAGCAGCATCGAATATTAATAAATAAATTCTAATAGCCGGTCGTATATATTTTTC  
TTTGATCAATTCCAAGTGAAGCTGCAGGAGGATCAATCGCTTTCATAGCTGAAGAATA  
TGCGAACCTCGTTTCGATATATTCGACTGGCCGAAATCATCGTGGGAG-----AATGCA  
TCGGCCAGTGAGGATGAGGATGGTTCGGGCTCTGATGAGGACGAGGATGGCGATGGCGGA  
GTAAGCGGATCCGATGCGGGA-----AAAAGAAAAGAAGAAGGAAAA  
TCGAGGAAAGAGAGGAAGAAGTCCAAACAGCCGGCG---ATCGTTTACACCGACGCTCAG  
CTATCGGGATTATTGAAGGACGTCATCGCTAACAACCTTGCAAGAAGCGTTGCAGTGGCTT  
AAGGAGTCACTGGAAGAGTCCCTGGAGGACCGCGAC-----GAGGAGAGC  
CACGAAGGCTTGGCGCTCGTGCCGCTAACCGCTGAGACGTCAGCTGCGATGGACTCGCCG  
AATTCCAGCGCTTCTTAGAGGCGCCGGCATTGAACCGCCA---GATCTCGAGGAGGCT  
TATTGGCGCATACCCGCGAGTATGCTGGTACTACCGTCAA

>Pogonomyrmex\_barbatus

CGATTGCGGCGCACTTACGTTGTACAAAATATGAAAGCTACTGGAGAAAATCAAATGATA  
TGTCACGAACCATATAAAAAATCGAAGCTTTAGAATTCGGTTACAACAAGAAT---AGA  
GTA AACGACGCAAAGACAACTGGGCCTGCGAGATGTCAAG-----  
-----GAAGAACGCACATCTGCGCTCAGCGTGCGACTCTTTTTTAAAAGAGTTCTGC  
GTAGAGTTTTTAAGCGCGCTTACAATCCTGTAATGAGATTTCGCTAGATCATGTATCATG  
AACGACACTCACAGTCAAGCGCTA-----GAAACAGCCGTCTATCTTTGGGTCTACGT  
TTCTTCATGGAGTTCAATCGACATTAC---AAGTTTCAAGTAAAATATGTGAGCGAAACT  
ATATCCACAGAAGTATTTTATTTAGTGCAAAGACAAATGGAACAATATTATGAAATGATA  
ATA-----ACCGATAAAAAAAGGATACCGCTTTGGTCTCGTAGATTACATTTGGCA  
TTGAAAGCATATCAGGAGCTTCTAACACTCTTATGGCAATGGATAAGAGTAAAGAT---  
GATGGTGTAGGGAATCCTGCAAGATAATTAAGCAATATCTTTTACGTCCCGGAATAT  
CGGGAAACGATATTCTCTCAGCTTTTGTGCTTCGACGAGGTTAAAATGTCACGGCAGTAC  
TTAAGAGATCTTATAACGACTGCTCACATATTTTTTAAAATGCTGGAACATTTCTGTGAG  
AAAGCCAACGACATCTCATAGTTTGTAAAATAAAGCCAAAGAGAAGAAAGGCTAAGAAA  
GGAAAACAGAATCTACCAAGGAA-----AATGTAACACTACGGCTCCTACCTTGGA  
GAACGTTGGGACATATTGGTCCCTGAATTATCTGCTGTTATGCGC-----GATGCCGT  
-----ATACCTGTAGTGATGCCATTTGGTGAACCTTAGATACACCTATC  
GACGATCAAAAAGCGGACGCCATGAAGAGAATCCAGAAATTAATGCGACAGAGAACTTG

GAACAGGCACTCGGCCTCCTACGTGCAGCAAGAGAAATCTGGCCC-----GAAAATGAC  
TGCTTCGGAAAAGCGGACATGCTTCCCGAGGAAGAATTTCTAGCCCTTCGCGAAATCTTC  
TTTGGCGATCTGGGCGACGAAGAGGAA-----

-----GAAGAAGAGGATGAAAATGAAGAA---GAAGAA  
GAGGAAGAAAGTAGATTCCAGGAAACCGATTTTAAATTAGACGAGTTTCTTAAAAGGTTT  
GCTAATGTGAAGATTGTCAAGGCTTTAGCACTACTACTGCAACAATTTGAGACCAATACA  
GTCGAAACAAATCACTACATAATAAAAATGTTACATCGGATTGCTTGGGATTGTAAAATG  
CCTGGTATGATATCCAAGCGTCCATATTTTCGGATTTTCAACGAATCTCAGACTCA---  
AAAGAT-----CCTACACATAAGGAGCTCCAAAAGTTTCGCGGTCTTCATAATCCGC  
CGTTTCATCGAAGTCGCTCAGAAAAACCGGAAG-----TCGTACATGGAG  
CTGCTCTTCTGGAAGACCACCCGCGACGCGACAGAAATCGTGGATGGCTACAACGCGGAA  
ACGACT---AACAAGAAAGTTTCACGAGCGACCTGGACGGAGGCGGAGGAGGATGAGCTG  
CGCACCTCTTCATGGAGCATCAGACTAAC---AAATATCCTCAAGATTTAATTGACTGG  
CTATTGGAGCATATCATCAACGAAAATAGAACGCGACGTACCATCATCAAGAACTCAAA  
GAGATGTGTTTGTATTGTCAATTCTAAGGCTGTGCGAGCTGAGGTACAAAAGAGA-----  
---TTACCCAAGGAGTGGTCCGAAGAAGAAATCTCCAGCTTACAGAACTTTGGACACAG  
CTCAAAGATGATGATGATCCCGTGGATTTGATTTTCACCGGTCTTAGAATAAAGCGGCCG  
AAGCCGAAGATCAAGGAGAAGCTTCTGGAATTAGGATTGGCGCGGGATCGCAAGGAGCTG  
CGCAAAAAGCGGGCCAGAAAAAGCAACCAGGGTAAATCGTCGTGGGAAACGCAAGCTGCC  
AGTAATTTCTGACGGGAACGAAAGTTCAGCCACCGACGACGAGGACGACGAAGAACTCGA  
AAATCCTCGAAGCGCGGCGGCGGCGGCGCCTCGGCGGAGCGAGGCGCCG---ACG  
AAAAAGAAACAACGAAACAGACGAAAGCTACCGACGACGATCGTTTACACGGATGCACAA  
TTATTCGGTCTCGTGAAGGACGTCATCGACAGGGATATGAGAGAAGCGTTGGAATGGATC  
AAGGAATCCCTGCAAGATGTTCTGGATGATCGTGAC-----GAGGAGAGC  
TCCGAGGGCATAACCTTGGTGCCGTTGACAGATTACTCGTCAGCCGCGATGGATTACCG  
AGTTTTTCAAAGCTGCTTCGCGCCCTGGGATTTGTGCCACCAGCTGATGCCAAGAATCT  
TATTGGCGTATCCCGGCGAATATGCTTACAATCACGATACAA

>Solenopsis\_invicta

CGATTCGGTGGTACTTACGTTGTGCAGAATATGAAAGCTACTGGAGAAAATCAAATGATA  
TGCCATAAACCATACCAGAAGATCGAAGCACTGGAATTCGGTCATAATAAGAAA---AGA  
GTGAAGCGACGTAAGGATAAAATGAGCCTGCAAGACCCCAAG-----  
-----GAGGAGCGCACGTCTGCTCTTAGCGTGCGACTCTTTTTGAAAGAGTTTTGC  
GTAGAATTTCTAAGCGGGTTTACAACCCCGTGATGAAATTCAGTAGGTCTTGCTTTATC  
AACGACACTCATGGCCAAGCAGTG-----GAAACGGCTGTCTATCTGTGGGCCTTACGC  
TTCTTCATGGAGTTCAATCGACATTAC---AAGTTTCAAGTGAAATATGTAAGCGAACT  
ATATCTACAGAAGTGTTTTACCTAGTGCAAAGACAAATGAAACAATACTACGAGATGATA  
ATA-----GTCGATAAAAAAAGATACCGCTTTGGTCTCGTAGATTGCATTTGGCA  
TTAAAGGCATATCAGGAGCTTCTTAACAATCTCATGGTAATGGAGAAGAGTAGAGAT---  
GATGGTGTAGAGAATCCAGCAAGATAATTAAGCAATATCTTTTATGTCCCGAATAT  
CGGGAAACTATACTCTCTCAGCTTTTGTGCTTCGACGAGGTTAAAATGTCACGGCAGTAC



TTGGTGGATCTTGTAACGACTGTTACATATTTCTAAAGATGCTTGAACAATTCTGCCAG  
AAAAATACACGACATCTCGTAGTTCAAAAAGCAAAGTCAAAGAGAACAAGACCAAAAAG  
AAAAAA---AAGCCTACTCAAGAA-----AACGTAACCTACGGCTCCTACTTTGGAA  
GAACGTTGGGACACTATTGGCCCCGAATTATCTGCAGTTATGCGC-----GATGCTGTT  
-----ATACCTGTAATGGTGCCATTTGATGCAACCTTAGATACGCCTATT  
GATGATCAAAAAGCGGACGCCATGAAGAGAATTCAGAAATTAATGCGACAACGGAACCTG  
GAACAGGCAGTTGGTCTTCTACGTGCAGCAAGAGACATTTGGCCA-----GAGAATGAT  
TGCTTCGGAAAAGTGGACATACTCCCGAGGAAGAATTTCTAGCTCTTACGAAATCTTC  
TTTGCTGAGCTGGGCGATGAGGAAGAA-----

-----  
-----GAAGATGAAGACGAGGAA-----GAA

GAAAGAGAACTGTTTATCAAGAACTGACTTTAAATTGGATGAATTTATTCAAAGGTTT  
GCCAACGTGAAGGTCGTCAAGGCTTTAGCACTTTTAAATGCAACAATTCGAAAGCAACTCG  
ATCGAAGTAAACCACTATGTAGCAAAAATGCTACATCGTATCGCTTGGAAATGTAAAATG  
CCGGGCATGATATTTCAAGCATCCATCTTTCGGATTTTCAA AAAATCCTTGAGTCA---  
AAGAAT-----CCTGAACACAAGGAGCTCCAAAAGTTCGCGGTCTTCATAATCCGC  
CGTTTCATCGAAGTCGCCAGAAGAACCGGAAG-----TCGTACATGGAG  
CTGCTCTTCTGGAAGACTACCCGCGACGCGACAGAAATCGTGGATGGCTACAGCGCGGAA  
ACGAAT--ACAAGAAAGTTTCACGGGCGACCTGGACGGAGGCGGAAGAGGACGAGCTG  
CGTACTCTCTTCATGGAGCATCAGACTAAC---AAATATCCTCAAGATTTAATTGACTGG  
CTATTGGAGAACGTCGTCAATGAAAATCGAACACGACGCACCATCATCAAGAACTCAAG  
GAGATGTGCCTGATCGTCAATTCTAAGGGTGTGCGAGCTGAGGTACAAAAGAGA-----  
---TTACCTAAGGAGTGGTCTGAGGAAGAAATCGCCCAACTTACGGAACCTTGGACACAG  
TTCAAGGACGATGATGATCCGGTAGATTTGATTTTCAACGGTCTTAAAATAAAGCGGCCG  
AAGCCGAAGATCAAGGAGAAGCTTCTGGAATTAGGATTGGCGCAGGATCGCAGGGAGCTG  
CGCAAAAAGCGGACCAGAAAAGCAACCAGGGTAAATCGTCGTGGGAAACGCAAGCTGCC  
AGTAATTCTGACGGGAACGAAAGTTCAGCCACCGACGACGAAGACGGCGAAGAACTCGA  
AAATCCTCGAAGCGCGGTGGT-----GCACCTCGCCGGAGCGAGGCGCCGTGACG  
AAAAAGAAGCAATGGAACAGGCGGAAGCTACCGACG---ATCGTTTACACGGATGCACAA  
TTATCCGGTCTCTTGAAGGACGTCATCGACAGAGACATGAGAGAGGCATTGGAATGGCTC  
AAGGAATCCCTGCAAGACGCTGTGGACGATCGTGAC-----GAGGAGAGC  
TCCGAGGGCATAACCTTGGTGCCGCTGACAGATTACTCGTCTGTTGCGATGGATTACCG  
AGTTTTCAAAGCTCCTTCGCGCCATGGGATTTGTGCCACCGCTGATGCCAGGAATCT  
TATTGGCGTATCCCGGCGAATATACTTACGGCTACGCTCCAG

>Tribolium\_castaneum

AGATTTGGCGGCACATACGTCCTAAAATCAATGAAATCAATTAGCGACAACGAACTTATT  
TATCACAAGCCGTTAAATAAACTCGAAGCTTTGAATTTTCGACGCTGACAAAAGG---AAG  
CCCAAAACACCGAAAAATCGTATGCCGGTGCAGAGTAGCACG-----  
-----TTTGAACGGCGTTCGGCTTTCAGCATTAGATTATTTCTGAAAGAGTTTTGT  
GTTGAATTTTTAAATGGGGCTTACAACACGCTTATGTATCACGTTAAGGATAATTTAGTC  
CGCGTAGG---GCACAAGCACAC-----GATGAATCCTATTATTTATGGGCCCTTAGG

TTTTTCATGGAATTTAATAGATGTTAT--AAGTTTGAAGTTAAATTAGTTAGCGAGACA  
ATGGCGGTGCAAACCTTCCGCTACGTGCAACAACCTGACGGAGAAGTACTTCGATATGATC  
CAG-----TCGGACAAGAAAAACGCCGTGTTGTGGTCCCGACGCCTCCATCTGGCC  
CTTCTCGCCTACAGAGAGTTGTTTCTAACCTTTGTGCGATGGATAAATCCCCGGAC---  
GAGACGGTGC GCGATT CAGCTCGCGTGATAAAAAGTAACATATTCTACATAGTGGAGTAT  
CGCGAATTCGTGATAACTTTATTAATGACTTACGACGAATTGAAAATGTGGAACGCGTAT  
CTGAAGGATCTCATGGAGACCCAGCATGTTTTTCATCAAGTTGTTGGAGAGTTTTTGGCGG  
TCGAACGGCTCGGTTGTGCTACAGAAGAACTGAAAAAGAAGGGGAGGAAGAAAAAAGCG  
AGTCAGGATGATGGCGTGCCACAG-----CCAGATGTAAATTTAGAA  
AGACGGTGGGATGAAGCCGCCACAGCTGTCCACCGTTCTCGAA-----GGAAATGCG  
GACTTT-----TCCACCGACGTCGTTCCGTTTGATGCCGCTCCGACGTTCCCATA  
GACGAACAAAAAGCCGAAGCTATGAAAAACGTCCAGAGGAAGCTGCGAAACGCCGACTAC  
GAAAATGCAATCAGTCTCTTGCGGGCTGCAAGAGAAGTCTGGCCC-----GAAAATAAT  
TGCTTTGGGAGCAACAATATGGCACCCGAGGAGGAATCTTGGCACTCCGCGACATTTTC  
TTCGCGGATTTAGGTGACGACGAGCCGACGCCTACCATCGAGGAG-----  
-----  
-----CAGCCGATTTACGACGAAAACGACGAGGAGGAA  
GACGAGGAGGCGGGCTATGGCGAAGTCAATTTCAAATTCACCGATTTTTTCGAAACGCTTG  
GCTCACCTCGAATAGTGCAGCGTGTGGCCTAGCTTTGCGCGACTTTGAGTCAAATTC  
GTGAACACAAATCACTGCATCATTAAGTTGCTCCATCGCATCGCTTTCGATTGTAAACTG  
TACGTAATGATTTTTCAAGTATCAATTTTCCGGACTTTTCAGAAGATTTATGCCAAT---  
AAGGATTTT-----CCCCAATATCGTGAACCTGTGAAGTTTGCGACTTATATTATTCGG  
CAATTTATAAAAATTACGGAGATTAATAAGAAA-----GTTTATATGGAA  
AGTTTGTCTTCAAGAATACGAATGAGGCGTACGAGATCGAGCATGGATAT-----  
GGGACT--ACGAAAAGGCGCCTTCTCGAGGCTGGACCGAGGAGGAGGAGGACGAACTC  
CGGCGTTTATTCATGGAACACCAAACGAAT---CAACTGCAAGACGACGTCGTCGATTGG  
ATCGTTAATAATCTCATTGATAACACGCGAACTCGTCGCGCCGTATTGAAAAA ACTCAA  
GATATGTGTCTGCTCGTCAACCCTGCGACGATGAGA-----AAATCT-----  
---ACACGTTGCGAGTGGGGCGACGAGGAAGTGATGCAATTACGGGCATTGTTCCACGAG  
TTCAGAGACGCCCGGATCCGCTCGGATGCATAATGCCTAGATTAGAAGTGAAGAGGTCC  
AGGCAGATGCTTACGAAGAACTGCTAGATTTGGGGGTGATACGGGACAAAGCCGACGTG  
AGGAAGAAGCGAGGGGGCGCAAGAGGCCGACAGCGACGAGGCGAGACAGCGATTTCGGAA  
AGTAATGGATCAGAAGATGATGATTATGGT-----GGTGGAGCCAGTCGAGGA  
GATAATTCCGCGGCACAAAGA-----AACACA ACTAAAACAAAA  
AGCAAGAAAAAGAAACCTGTAACGCGTCAAGTAAAT-----ATGGCATCGGATGCCCGG  
ATTGCCGCACTTTTTATTAACTTGTGCGAGTCAGGGATGAGTGAAGCGTTAGAATGGCTC  
AAAGACAGTTTTTCCGACGCTGTTGAAGATTTTAAAAT-----GATGACGGA  
TGTGAAGGAATTCATTAGTCCCAATAATGGATTATGCAGTTAATGCTATGGAAAATGCT  
GATTTTATTGAAACGCTCAAAGCTCTCGGCGTGGCTGAGCCTTTCGACGAACAGGAAATG  
TACTGGCGAATTCGGGGCAACTTATCAGTGCATGTGATAAGA

supplement file3\_after\_delet\_gap

>Pediculus\_humanus

AATTTCAAATCAACTTTTGTATTCAAATATAAAATCGATTTCAAATTTAGATTTTCGTTT  
CTCATTCTTTAAACAACCTTGGAGGATTTGGCTTATCTGACACTTTTGGAAATTTTACATTG  
GATGGATTGTTCCAAGAAACCTTTGGTTCGAGCATTGTCGAGAGAAATAAAATCTGATTTA  
TTTTACGTTATGGAATATAGAGAAATGACATTAAGTTTATTCATGAAATTCGAAGCCAATA  
AATTTACATATTTGAAAACGCTCATTCAAACGGCACATTTATTTATCAAACCTCTTGAAGA  
ATTTTCAAAAAGTTCTAAATGATTGTGCAAAAAGATTTCAAAAAAAGAAAACCGATTAA  
TAAATGGGAAAAAATTTGTGATGATTTACAAAACCTTAATGGCAGACATATCACCCCTTGAT  
GCCACTTTGGATACTCCAATAGAGGAACAAAAAGAAAGAGCGATGAAAAATATTCAAAAAT  
CTCTACATCTTAGAAATATTAACGAAGCTCTTGGATTATTCAGGAGTTCTAGGCAAGTGTG  
GCCGAAAAATGATTGTTTTGGTAACGAAAATATGACGATCGAAGAGGAATTATCTGCCCTT  
AAAGAAATTTGCCTCGCCGATTTATTACGGTTGGTACATAAAAAGGTAGTTGAAATATGTG  
GCCTTTTATTGAAAAATTACAAAATAATTCTGATCACGTCAATCATTGTGCAGTTAAACT  
CCTTCATCGAATAGGTTGGGATTGTAATATGCCTGCCATGCTTTATCAAGCATCTTTGTTTC  
AAACTTTATTAAATATCATGAATGATAATTACAGTGAAATGAATACGTTACAGATAAATTTA  
TTTCAAAAGTTTCGAAAACATGCCAGCGAAAACAGTATAGTTTTTTTTGGAATTATTGTTTT  
GGAAAGATTATTCCGTTGCATTAGAAATTCAAAATAAATATACAATGACAGGAACCAAGGG  
AAAAAGGTCTAAAAAAAATTAAGACGGATGAAAACAGTAAATCAAAGAAAAAAGTAA  
GAAGAAAATGGAAGAGGAAGAAAGTTTTCCGTCAAATGACCCTCAAATTTTTGAAATGGA  
TTCGTTGAAAACAGGAGATTCACTTTTCAAAGAGGAAAATTTTATTGAAAATGATATTTTA  
ATCAAAGAGAAAATCAACGATTTTGATGTTACGGAATAGATGGTACCCATAGTGATGGTA  
CCCATAGTGATGATGGTTCGATTAATAATAAATTTGATGACAAGATAATTTTTAAATCTAGA  
AGAAGGTTGATATCGTCGGATGATTCAAATTTCTGATGGTGAATAATTATGTGGAA

>Tetranychus\_urticae

TTC AAGGATTCAA CTTATCTAGTGA AAAATTTCAA ATCTGTTGGTGA AAAATGATTTGATTT  
ATCATACCACTGAAGACATTGCTCTAAAAGCATACAAAGAGCTTCTTTTCACAATTGCCTC  
GATCAAACATGCACAAGAAGAGCGACTGTTGTATCTTGCTAAAACCATGAGTGACAAAAGTA  
TTCTATGAACTCGACTACCGTGA ACTACTGCTGAATCTAATTTCTGGTTATGATGAAAAAA  
AGATGCAATTTCTGCGAGATTTGATTGAAACAAATCACGTCTTCCTCAA AATGTTAGATCT  
TTACAGTAAGTCGAATTTTCGTGGTCAAGACAAAAAAGAAAAAGCCGACTGCTATGGA ACTA  
GTCTGGCAAGAAATAGTCTTTGAATTGGACGAGGCTATTCAAGAAGTTCTTTCTTTTAATG  
TTTTGTCTGAAGAGACTAGAGATGCC CAGAAAGAAGATGCCTTGTATCGAATAAGCAAAT T  
TTTAAAACAAAGAAAAAATTTTACTCGCTTTAGCACTTTGTAGAAATGCACGAGAAGAATAC  
AACGACGATACACCTTTTGGAGCTCCAGACTTATCTCCTGAAGAGGAAGTAGCTATTTTGC  
ACAGAATTATCGCTACTGAAAAGTGGAAATACTGTAATTCAAAGGTCGTAAAAGCTTATTG  
CTTAGCGTTGAAAAAATTCGATATAAATTCGGAAATACTTAATCATGCCGATACTTCGAATG  
GCTCACAGAATTGCCTTGGACTGTAAATCTCCTGTTTTCTTCTTCCAGCTTTCAGTTTTCA  
GGATATTTCAAAGATGCTTTGAAATAAAATTTCTCAGAAATAAGGAATTTTGCAAGATTCAT

AATCAAAGAGTTTGTAGTCAAGCTAAAGGTAACGATAAACTTTTAGTGGAATTCATTC  
TGAAAAATAAGAAAGAAATGCATGAAATGAAGAGAATTATAAGGAAGGAAAGGAAAG  
AAAGGTGAAGATGATGCCATTAECTCAACTTATGATTCGACGATGACGCAGATGAATTTA  
ATCCCAAATCCAAAGCACGCAAATCCAAAAGAAAAGTCAAATCTGCGTCCGTTGCTGA  
AAATAATCCTACCATTTATGATGAAGTCATTGATGTAAATTATGAAGAGCTTCAAGATCAA  
CCTGGATCACTCAATCCTTATGATCTCATGATTAATCAAGTTGCAGCCGATGATGACAGTCT  
TGACAATGATTTTAAAATGATGTAAATAATGAGAATCTATAATAGGAGCAACCCAATTA  
GCTGATGATTTAAGTGATGCTGAAACCATTGACGGTGAAGTTATTATTTCCAAG

>Acromyrmex\_echinatior

CGATTCGGCGGTACTTACGTGCTGCAAAAATATGAAAGCTATCGGAGAAAATCAAATGATAT  
GCCATCCGTATCAAAAATTGGCATTAAAGGCGTATCAGGAACTTCTTAACACTCTTATGGC  
AATGGATAAGAATAGCGATGATGGTGTAGGGAATCTAGCAAGATAATTAAGCAATATC  
TTTTATGTCCCGGAATATCGGGAAACGATACTCTCTCAGCTTTTGTGCTTCGATGAAGTTA  
AAATGCAGTACTTAGTGGATCTTATCACAATTTATCATACTTTCTGAAAATGCTTGAACAC  
TACTGTCAGAAAGGCCATCTCGTAGTTCAACAAATAAAGAAAAAAGCTAAAGCTCCTACTT  
TGTGGGATATTATTGGTCCCGAATTATCTGCTGTTATGCGCGTAGTGGTGCCGTTTGACGCA  
ACCTTAGACACGCCTATCGACGATCAAAAAACGGACGCTATGAAAAGAATCCAGAAATTA  
TGGGACAAAGAACTTGGAACAGGCAGTTGGTCTTCTACGTGCAGCAAGAGAAATCTGGC  
CTGAGAATGACTGTTTCGGAAAAGTGGACATACTTCCCGAGGAAGAATTTCTAGCTCTTCG  
CGAAATCTTCTTTACAGATCTGGGTAGGTTCCGCAATGTGAAGATCGTCAAGGCTTTAACA  
CTACTAATGCAACAATTCGAAAACAACACAATCGAACTTAATCACTATGTTGTA AAAATGC  
TACATCGGATTGCTTGGGATTGTAAAATGCCGGCATGATATTTCAAGCATCCATATTTCGA  
ATTTTTCAAAGAATCCTCGAGTCAGCACATAAGGAGCTCCAAAAGTTCGCGGTCTTCATAA  
TCCGCCGTTTCATCGAAGTCGCCCAGAAGAACCAGGAGTCGTATATGGAGTACTCTTCTG  
GAAGACTACCCGCGACGCGACAGAAATCGTGGATGGTTACACCTGGACGGAGGCGGAAGAG  
GACGAGCTACGTACCCTCTTCATGGAGCATCAGACTAACAGAACACGACGTATCATATTAA  
GAACTCAAGGAGATGTGCTTGATCGTCCAGAAGCTACTGACGGTTTACACGGATGCACAA  
TTATCCGGTCTCTTGAAGGACGTCATCGACAGGAACATGGAAGAGGCATTGGAATGGATCA  
AGGAATCCCTACAAGACGTTCTGAGCATACCCTTGGTGCCACTGACAGATTACTCGTTGGC  
CGCGATGGATTCACCGAGTTTTCAAAGCTCCTTCGCGCCATGGGATTTGTGCCAGATGGC  
CAGGAATCTTATTGGCGTATCCAGCGAATATACTTACAACCACACTTCAA

>Acyrtosiphon\_pisum

AAATTTGGAGGCCGATACGTTGTTTCTGGTATGAAATCAATTGGTGAAAATGAAATGGTTG  
TTTCATCAATGACATCTTTAGGACTTAAAGCTTATAAAGAATTAATAGAAACTCTTAGT  
GATGTATCAAAGTAAAAACCAACGTTAGAATCTAGTGCTCGGACAATTTTAACTAATTTA  
TTTTACATGGTTGAGTATAGAGATTTGCTATTGAGTTTGCTAAATTTATATGATGAAACAA  
AATTCATGTACCTTAAGGATCTTATTGAAACAAATCATGTTTTTATGAAGCTTTTAGAGCA  
TG TAGGTAAAAACAGAATTTGATTGTGCAGTGCAAAACAAAGGCTTCTAAAAATGATGA  
TGATTGGAATAATTCAGTCCAGACCTCAAAGAAATTTATCAAGAAGCAAGACCTTATGAC  
CCTATATCTGAAGTGCCAATGGAAGATCAAAAAGTTGAAGCCATGCAACGTATACGAATAC  
ATATAAGAAATAAACGTTTGAAGAATCTGTACAATTAAGAGCTTCTAGGGAAGTTTG

GCCCGAGGACAGTTATTTTGGAAAACCAGGGCTAAATAGCGATGACGAATTAGACATTTTA  
AAACAAATATTCCATGCTGATCTTGGAAAATTTGCAAAACCGAAAATTTTACAAAACCTGCT  
GTCAACTCTTGAAAGAATTTGATAGTAATTCTACATATACCAATCATGCTATAGTGAAACTT  
CTCCATCGCATTACATATGACTGCAAGTATAGTGCTTTGATGTTTCAAGCTTCTGTTTTTCG  
AGTTTTTCAAAAAATATTTTCGTCCAATCATAAAGAATTAAAACATTTTGCTACATTTATT  
ATGAGAAAATTTACGGAAGTAGCAAAAAAATAAAAAAGTTTTTATGGAAATATTGTTT  
TGGAAGAATTA AAAACCGCGTTTGA AATTGAAGAAGGATATAATTGGAGCGAGGAACAA  
GAAGATGAGCTACATAGATTACATGAAGAATATACAAGAGATCGTTCAAGAATTAGTGTTT  
TTAAAAAACTCAAACAACTTGA AATCATTCCAGATACAGAACCTATTAGCTTAACTTCTGT  
TTATGTATTGAACGCTATTA AAAAAGTAATTGATAAAGATATGAAAACAGCTCTATTGTGG  
TTGGTTGAGAGCTTAGACGAGGCTGCAGATATACCCCTATTGCCATTGACTGATGAATGTAT  
GACAGCTGTTAATGATATTGATTTTCAAGAAATGATGCAAGTATTAGGCATACATAAAAAGT  
ATTCAGGAAACCTATTGGCGTATACCGGGTAGATGGCAAGCAAATGATATCCCG

>Anopheles\_gambiae

CGGTTTCGTGGCACGTACACGTTCAACAATGTGAAATCCATCTCGGACAGTGATGCCGTTT  
GCCACTCGTTGGGCAAGCTAACTATACAGACTTATCGGGAGCTGCTAAACAATATGCATGCC  
CTGGA AAAGATTAAGGATACAGCGGCTTCCGAGCTTCTCTCGGTACTGCAGAACAACATCT  
TCTACGTCGTAGAGTATCGTGAAACGACCCTTACCTGTTGACGAGTTTCAAGGAAGCATT  
ACATGCTTATCTAAGAGATGTCATCGAAGTGGCGCATCTGTTCTTTAGCATGTTGCAGCGA  
TTCTGCAAGGGCACGGTACAGGAGCGGGTGAAAGCAAAGCGCAAGAAGGCTGAGGAAAAT  
ATCTGGCTGCAGGAAGCACC AACCATTGCCTCGTTGCTGGA ACTACCCACGCCGTTTCGATT  
CGGCCTCTTCCGTTCTGTTGAGGAGCAAAAAGGAGATTGTTTGAAGAGTATCCATTCGTT  
GCTGAGGAAAAGA AACTACGAACAGGCAATCAAATGCTGTATGCTGCAAGATCGGTTTG  
GACGACGAGCAGCTGCTTTGGCAGCGAGACTGCCACCCCGGATGAGGATCTGATCACGCTT  
CAAGACATTTTCGCCGCCAATTTGTCTCGCCTAGTAGACCATCGCGTGGTTTATGCCTGTAC  
GACGGTGCTAACGGATTGGGAAAAGATCAAGACCACATGTCTGAAGGCAGCCGTGACACTG  
CTTTACCGCATTTGTGTTCGAGCATAAGATGCCCTCGATGCTGTTTTCAGGTGTCACTTTTAC  
GCATATTTCAAGCTGTGCTGAACGCGCATTTCGCGCGAACTTCGCCGGCTTGCGATTTACAC  
CGTGCGTCAGCTGCAGCAGAAGGTGCTGACTGGGGCCGAGCTGTTTGCCGAGCTGCTGTTT  
GCCAAAACGTCGCGAATTGCGTGCGCACTGGA AATAGGCTACGCATGGACCGAAGAGCAGG  
AAC AAGAGCTGCATCGCTTGT TTTATGGAAAATCAAGAAAATCGCACCCGGCGTGCCGTGAT  
GAAAAGCTGAAGGAGATGGGCCTTACCTTTTTCAATCAAAGCATCCAGCTGAATGAGCCG  
CTCGTGAAGAAAACCTGAAAGCACTCCGTGGCGACGATATGAAGCAAGCCGTACGATGGA  
TCGTGCAATGCTTCGAAGAGGTTTCGCACCGTTCCGATGATTCCGATTGCACCGTACCAAAC  
CGCTGCCCTGAAGAAACCGGAATTC AAGCGTTTGTACGGTCGCTTGGTGTGATGGACGGC  
CGACAGTTCGTCTACCATCGGATACCGTTTCAACTGACGCCGGAAGAGTTGAAA

>Apis\_florea

CATTTTGGTGGGACTTACGTGGTGCAAAACATGAAAGCCATTGGTGAGAATCAACTAATAT  
GTCATCCGTACCAAAAATAGCATTGCAAGCATATCAGGAACTTTTGTACACTCTAATAGCG  
ATGGATCAAAGCGCGGATCGTGGTGT TAGAGAATCCAGCAAGGTTATTAAGAGTAACGTGT  
TTTATGTTCCCGAATATCGGGAAACGATTCTTTCCAGCTTCTCAATTTGACGAGCTTAA

AATGAAATATTTGATTGATCTTACAACAACGGCACACGTTTTCTTAAAAATGTTGAGCAAC  
TATTGCCGAGAAAAATAGCGTGGTGGTCCAGCAAGTGAAGCAAAGGAATAAACCTCCAAGCC  
TGTGGGATGAAATTAGTCCTCAACTGTCCATTGTGATGCGGGAAGTGATACCATTTCGATGC  
AACTTTGGATGTGCCTATAGATGAACAAAAAGTTGACGCTATGAAAAAGATTCAAAAGCTA  
CTGCGACAGAAGTTTCTCGAGCAAGCTATTGGCCTTCTTCGTGCATCGAGGGAAGTCTGGC  
CCGAGAACGATTGTTTCGGGAGAGCTGATATTACACAGGAGGAGGAATTCCTAGCGTTACG  
TGAGATATTCGTTGCAGATCTGGGCAGATTCGCCAATGTGAAGATCGTGAAAGCGATGCTG  
ATTCTCCTGCAACAATTTCGACAAGAACACGGACGAGGTGAATCATTACGTGAACAAGATGC  
TTCATCGGATAGCGTGGGACTGCAAAATGCCAGGGATGATGTTCCAAGCGTCGATGTTCCG  
AGTTTTCCAAAGAATCCTCGAGTCCGGCCACAAGGAACTGCAAAAGTTCGCGGTCTTCATA  
ATCCGCCGTTTCATCGAAGTCGCGCAGAAGAACCGGAAAGCGTACATGGAGCTGCTCTTCT  
GGAAGACCACTCGTGACGCGACCGAGGTCGTCGAGGGTTACCTCTGGACCGAAACCCAAGA  
GGACGAGTTACGCACTCTCTTTATGGAACATCAGACTAACCGAACACGTCGTGGCATCATA  
AAGAAATTGAAAGAAATGTCTCTAATTATCAAGAAACAGACAACGGTTTACACGGATGCAC  
AATTATCTGGACTCTTGAAAGATGTCATCGAAAGAAATATGAGCGAGGCTCTGGAATGGAT  
CAAGGAATCCCTACTGGATGTCCTGAGCATCCCTTTAGTCCCGCTGACAGATTATTCGTCCG  
CTGCGATGGATTACCGAGCTTTCAGAAGCTTATTCGGGCTATGGGATTCACACCTGATGA  
ACAAGAATCTTATTGGCGCATAACCATCTAATATGCTTAGCTCCATGATTCAG

>Apis\_mellifera

CATTTTGGTGGGACTTACGTGGTGCAAAACATGAAAGCCATTGGTGAGAATCAACTAATAT  
GTCATCCGTATCAAAAAGTAGCATTGAGAGCATATCAGGAACTTCTGTACACTCTAATTGCG  
ATGGATCAAAGCACAGATCGTGGTATTAGAGAATCCAGCAAGGTTATTAAGAGTAACGTGT  
TTTATGTTCCCGAATATCGGGAAACGATTCTTTCCAGCTTCTCAATTCGACGAGCTTAA  
AATGAAATATTTGATCGATCTTACAACAACGGCGCACGTTTTCTTAAAAATGTTGAGCAAC  
TATTGCCGAGAAGAATAGCGTAGTGGTCCAGCAAGTGAAGCAAAGGAATAAGCCTCCAAGCG  
TGTGGGATGAAATTAGTCCTCAACTGTCCATCGTGATGCGGGAAGTGATACCCTTCGACGC  
AACTTTGGATGTGCCTATAGACGAACAAAAAGTTGATGCTATGAAGAAGATTCAAAAGTTA  
TTGCGGCAAAAGTTTCTCGAGCAAGCTGTTGGCCTTCTTCGTGCGTCGAGGGAAGTCTGGC  
CCGAGAACGATTGTTTCGGGAGAGCTGATATTACACAGGAGGAGGAATTCCTAGCGCTACG  
CGAGATATTCCTTGCAGATCTGGGCAGATTCGCCAATGTGAAGATCGTGAGAGCAATGCTG  
ATCCTCCTGCAACAATTTGACAAGAACACGGACGAGGTGAATCATTACGTGAACAAGATGC  
TTCATCGGATAACGTGGGACTGCAAGATGCCAGGAATGATGTTCCAAGCGTCGATGTTCCG  
AGTTTTTCAAAGAATCCTCGAGTCCGGCCACAAGGAACTGCAAAAGTTCGCGGTGTTTCATA  
ATCCGCCGTTTCATCGAAGTCGCGCAGAAGAACCGGAAAGCGTACATGGAGCTGCTCTTCT  
GGAAGACCACTCGTGACGCGACCGAGGTCGTCGAGGGTTACCTCTGGACCGAAACCCAAGA  
GGACGAGTTACGCACTCTCTTTATGGAACATCAGACTAACCGAACACGTCGTGGCATCATA  
AAGAAATTGAAAGAAATGTCTCTGATTATCAAGAAACAGACAACGGTTTACACGGATGTAC  
AATTATCTGGACTCTTGAAAGATGTCATCGAAAGAAATATGAGCGAGGCTCTGGAATGGAT  
CAAGGAATCCCTACTGGATGTCCTGAGCATTCCCTTAGTCCCGCTGACAGATTATTCGTCCG  
CTGCGATGGATTACCGAGCTTTCAGAAGCTTATTCGGGCTATGGGATTCACACCTGATGA  
ACAAGAATCTTATTGGCGCATAACCATCTAATATGCTTAGCTCCATGATTCAG

>Atta\_cephalotes

CGATTCCGGCGGTACTTACGTCTGTGCAAAATATGAAAGCTATCGGAGAAAATCAAATGATAT  
GCCATCCATATCAAAAATTGGCATTAAAGGCATATCAGGAACTTCTTAACACTCTTATGGCA  
ATGGATAAGAATAGTGATGATGGTGTAGAGAATCTAGCAAGATAATTTAAAAGTAATATCT  
TTTATGTCCCGGAATATCGGGAAACGATACTCTCTCAGCTTTTGTGCTTCGATGAAGTTAA  
AATGCAGTACTTAGTGGATCTTATCACAACTATTCATACATTTCTGAAAATACTTGAACACT  
ACTGTCAGAAAGGCCATCTCGTAGTTCAAAAAATAAAGAAAAGAACTAAAGCTCCTACTTT  
GTGGGATATTATTGGTCCCGAATTATCTGCTGTTATGCGCGTAGTGGTGCCGTTTGATGCAA  
CCTTAGACACACCTATCGACGATCAAAAAGCAGATGCTATGAAGAGAATCCAGAAATTAAT  
GCGACAAAGAACTTGGAAACAGGCAGTCGGTCTTCTACGTGCAGCAAGAGAAATCTGGCC  
TGAGAATGACTGTTTCGGAAAAGTGGACATACTTCCCGAGGAAGAATTTCTAGCTCTTAC  
GAAATTTTCTTTACAGATCTGGGTAGGTTCCGCAACGTGAAGGTCGTCAAGGCTTTAACAC  
TACTAATGCAACAATTCGAAAACAACACAATCGAACTTAATCACTACGTTACAAAAATGCT  
ACATCGAATTGCTTGGAAATGTAAAATGCCGGTATGATATTTCAAGCATCCATATTTGCGGA  
TTTTTCAAAGAATCCTCGAGTCAGCACATAAGGAGCTCCAAAAGTTCCGGTCTTCATAAT  
CCGCCGTTTCATCGAAGTCGCCCAGAAGAACCGGAAGTCGTACATGGAGTACTCTTCTGG  
AAGACTACCCGCGACGCGACAGAAATCGTGGATGGTTACACCTGGACGGAAGCGGAAGAGG  
ACGAGCTACGTACCCTCTTCATGGAGCATCAGACTAACAGAACACGACGTACCATCATTAAAG  
AAACTCAAGGAGATGTGCTTGATCGTTCCGGAAGTTACCGACGGTTTACACGGATGCACAAT  
TATCCGGTCTCTTGAAGGACGTCATCGACAGGAACATGAAAGAGGCATTGGAATGGATCAA  
GGAATCTCTGCAAGACGTTCTGAGCATAACCCTTAGTACCACTGACAGATTACTCGATGGCCC  
CGATGGATTCACCGAGTTTTCAAAGCTCCTTCGCGCCATGGGATTTGTGCCGGATGGCCA  
GGAATCTTACTGGCGTATCCCAGCGAATATACTTACAACCACACTTAAA

>Bombus\_terrestris

CATTTTGGTGGAACTTACGTTGTGCAAAATATGAAAGCCATTGGAGAAAATCAGCTATTAT  
GTCACCCATACCAGAAGTTAGCATTGAAAGCGTATCAGGAACTTCTGTACACTTTAATGGC  
AATGGATCAAAGTACAGATCGTGGTGTAGAGAATCCAGCAAGGTTATTAAGAGTAACGTG  
TTTTATGTTATGGAATATCGGGAAACGATTCTTTCTCTCCTTCTCTGTTTCGACGAGGTTA  
AAATGCAATATTTGATTGATCTCACTACAACAGCACACATCTTCTTAAAATGTTGAGTAA  
TTATTGTGGGAGAAATAGCGTAATAGTCCAGAAAGTGAAACACAAAAGAACAGTTCGAAGC  
TTATGGGACGAAGTTAGTCCCCAACTATCTATTGTAATGCAACAAGTTATACCATTTGATGC  
AACGTTGGATGTACCTATAGATGATCAGAAAGTTGATGCAATGAAGAGGGTCCAAAAGCTA  
CTACGGTTCGAAGGATCTGGAGCAAGCTATTGGACTTATTCGTGCAGCAAGGGAAGTCTGGC  
CCGAGAACGACAGTTTCGGAAGTGCTAATATTACGTCCGGGGAGGAGTTTCTAGCGCTACG  
GGAAATCTTCTTCGCAGACTTGGGTAGATTTGCCAATGTAAAAATCGTGAGAGCAATGTTG  
GTTCTGCTGCAGCAATTTGACAAAAATACAAACGAAGTGAATCATTACATTACCAAGATGC  
TTCATCGAATAGCCTGGGACTGTAAAATGCCAGGGCTCCTATTCCAAGCGTCAATGTTCCG  
TGTTTTCCAGAGAATCTTGAGTCTGGTCAACAAGGAACTCCAAAAGTTCGCAGTCTTCATA  
ATCCGACGTTTCATCGAAGTCGCGCAAAAAGAACCGGAAGCGTATATGGAGCTGCTCTTCT  
GGAAGACCACTCGTGACGCGACCGAGGTCGTCGAGGGTTACCTCTGGACCGAAACCCAGGA  
GGACGAGTTACGCACTCTCTTTATGGAACATCAGACTAACCGAACGCGTCGTGGTATCATG

AAGAAGCTGAAAGAAATGTGTCTGATTGTTAAAAAACAGCCAACGGTTTACACGGATGCA  
CAATTATCCGGACTCTTGAAGGATGTCATCGAAAAAATATGAGCGACGCTCTAGAATGGA  
TCAAGGAATCCCTACTAGATGTCCTGAGCATCCCCTTAGTCCCGCTGACAGATTATTTCGTCT  
GCTGCGATGGATTCACCGAGCTTTCAGAAGCTTATTTCGAGCTATGGGATTCACACCTGATG  
AACAAGAATCTTATTGGCGCATACCGTCTAATATGCCTAGATCGATGATTGAG

>Bombyx\_mori

CGATTTCGGAGGAACATATGTTGTGCAGAACATGAAATCTATATCGGACAACGAGATAATTA  
GCTTGCCATTAAACGACCTGGCGTTGCGCGCTACAAGGAACTCCTCTACACCTTACTGGCC  
ATGGACAAAAGCACCGATCCAACGGTCAAAGAATCCGCTAAAGTATTAAGAGTAATATAT  
TTTACGTCCTAGAGTACAGAGAGTTCATACTAAACACATTTCTTAACTACGACGAAAATAA  
AATGTCTTATTTAGTGGATTTAGTGCAGAACTGTACATTTATCTTGAAAATGCTTGAACAT  
TATTGCAAGAAGACCGGATTAGTGGTGCAGAAGAAGATCTCCAAATCTAAGACGGAGCCAG  
GATGGGAGGAGGCCCGCCTCAGCTGGCGGCCGTGCTGTCTACCCGCCGCCCTTCGACGC  
CGCTCCGATGTTCCGATAGACCAGCAAAGGAAGATTGCATGAGGAACATACAGAAGTCG  
ATGCGGGAGTACAAGTTCGAGAACGCCGTCCGGATGTTTCAGGGCTGCGAGGGAGGTGTGG  
CCCGAAGACGGTATTTTCGGTGCTAGCGACATCGCTGAAGACGAAGAACTGAGTATGCTGG  
AAACGATTTATAACACTGATTTGGGTAAAGTTTTGTTCATCCAAAAGTTGTGAGCTCATGCGT  
CTCGCTGTTGGAACGATACGACAAAAATTTACCCACACAAATCACTGTGCCATCAAATG  
CTGCACAGAGTCGCTTGGGATTGCAAACGACCCTCCATGATGTTTCAAGCCAGCTTGTTTT  
TGATATTTCAAAAAATATTCAACAATCAACATAAGGAATTAGAGAAGTTCGGTATATATATT  
TTCCGAAAATTCACCGAAATAGCCTCTAAAAACCCGAAAGCCTTCATAGAACTGTTGTTCT  
GGACAAATTCCAAAGACGCATTGGACATTGAATACGGATACGTTTGGTCCGAAGAACAAGA  
AGAAGAACTCAGACGGCTTTACATGGAGAATCAGACCAACCGAACCCGACGGTCGGTTATA  
AAGAACTAAAAGAACTAGGACTCATATTCAGACAAAAGCTAAAGAATTGAATGCGAGCC  
AAGTCGCCAAGTTGTTGGTCAGCGCCGTGACAAACGGATTATCCGGAGCATTAAAATGGCT  
GGCGGAAAATCTAGAAGAACTAGCCAACACACCCGCTGGTGCCATAACCGATGAGTCAACC  
GAAGCCATGGACAAAGAACTTTTCAAACAAGTACTGCTGGGGATCGGTGTGGTCCCGGATG  
AACAGGAATCCTACTGGAGAATACCGAGCTGTTTACATTTTGAGACGATCAGA

>Camponotus\_floridanus

CGATTTGGCGGTACTTACATTGTCCAAAATATGAAAGCAACTGGAGAAAATCAAATGATAT  
GTCATCCGTATAAAAAATTAGCATTGAAAGCATATCAGGAGCTTCTTAATACTCTTATGGCA  
ATGGATAAGAGCATAGATCGCGGTGTCAAAGAATCCAGCAAATAATTA AAAACAACATCT  
TTTATGTTCCGGAATATCGGGAAACGATACTCTCTCAGTTTTTTGTGTTTCGATGAGACTAA  
AATGCAATACTTAGTGGATCTTGTACGACTGTTTCATATATTTTTGAAAATGCTCGAACAT  
TTTTGCCAGAAAGGTCACCTCATGGTTCAACAAACAAAGAAAAAAGCTAAAGTTCCTACTT  
TGTGGGACATTATTAGTTCTGAATTATCTGCTGTAATGCAAGAAGTGGTGCCATTTGATGC  
AACCTTAGATATGCCTATTGACGATCAGAAATCAGATGCTATGAAGAAAATACAGAAATTA  
ATGCGACAGAGCAACTTGAACAGGCGCTTGGTCTCTTACGTACTGCAAGAGTAATCTGGC  
CCGAGAATGACTGCTTTGGAAGAACGGATATACCTCCCGAGGAAGAATTTCTAGCTCTTCG  
AGAAATTTTCTTTGCGGATCTGGGCAGGTTCCCAACGTAAAGGTTGTAAAGCTTTAACA  
CTGCTACTGCAGCAATTCGAGAACAATACGGTCGAGGTAATCACTATGTAATAAAAAATGCT



ACATCGAATTGCTTGAATTGTAAAATGCCGGCCATGATATTCCAAGCGTCTATATTTTCGGA  
TCTTTCAAAGACTCCTTGAATCAGGATAACAAGGAGCTCCAAAAGTTTCGCGTTTTTCATAAT  
CCGCCGTTTCATCGAAGTCGCCGAGAAGAATCGGAAGTCGTACATGGAGCTGCTCTTCTGG  
AAGACCACCCGTGACGCGACAGAAATCGTGGATGGCTACGTCTGGACGGAGGCGGAAGAGG  
ACGAACTGCGTACCCTCTTCATGGAGCATCAGACTAACAGAACGCGACGTACCATCATTAA  
AAAACCTCAAAGAAATGAGTTTGATTGTCCGGAAGCTACCGACGGTTTACACGGATGCACAA  
TTATCCGGTCTCTTGAAGGACGTCATCGACAAGGACATGAGAGAGGCGTTGGAATGGATCA  
AGGAATCTCTGCAAGACATTCTGAGCATAACCTTGGTGCCGCTGACAGATTACTCGTCGAC  
CGCGATGGATTACCGAGTTTTCAAAGCTTCTCCGTGGCCTGGGATTTATGCCAGATGCC  
CAGGAATCTTATTGGCGTATTCCGGCGAATATGCTTACAATCACGATTCAG

>Ceratosolen\_solmsi

AGATTTGGAGGTACTTACGTTGTTTCAGAACATGAAGGCCATTGGAGATAATGAAATGCTCT  
GCCACCCTTATCAAAAATTAGCCTTGAAGGCTTATCAGGAATTGTTGTATACGTTGATCGA  
AATGGACAAGTCGACTGATTCTGGCGTGAAGAAGCTCGAGTCGAGTAATAATGGGCAATATC  
TTCTACGTACCGGAATATCGGGACACGATACTATCTCAGTTACTTAATTACAATGAACTGAT  
AATGGATTATCTGGTGGATTTGGTCCAACTGTACACATTTTTTTGAAGATGTTAAAAAAC  
TATTGTGATAAACAACACCTTATTGTGCAGAAAATCAAAAAACAGCCAAAACCGCCGAGTT  
GGTGGGACGTTGTGGGACCGGAAGTGTCCGCCGTTATGCAGGAAGTAATTCATTTCGACGC  
CACAATAGCCACTCCTATAGATGAGCAAAAGAGCGATGCGATGAAAAGAATTCAGAAGTTA  
TTACGAAACAATAATCACGAACACGCAATCGGACTTTTTCGCTCAGCAAGGGAGGTCTGGC  
CGGAGAACGACAGTTTTGGGAAAGCCGACATGGCCGTCGAGGAGGAGTTCCCTTGTCTGC  
GCGAGATCTTCCTAGCTGATCTCGGCGGATTTGCCAATGTACGTATTGTGAGTAATCTAACA  
ATTCTTTTAAAGCAGTTTGAAAAAACACACCCGAAGTCAATCATTGCGTATTAACACTGT  
TTCATCGAATCGCCATGGAATGCAAAATGCCGGCCATGATGTATCAAGCATCGATATTTCGA  
GTCTTTCAAAGGGTTTTTCAATACATGTATAAGGATTTAACAGTGTTTGCTCACTTTATAT  
TTCGCGGCTTCGTCGAAGTGCCGAAAAGAAATCCAAAGGCCTATATGGAAGTCTCTTTTG  
GAAATCAACAAAGCAAGCGATTGAAATGACGGAAGGCTACGTGTGGAGTGACGCCGAAGA  
AGACGAACTCCGAACTTTGTATTGGAGCATCAAACCAAACGCACGAGGCGTGGAGTAATG  
AAAAATTAAGGAAATGTGCCTGATTGTCAATAAACAAGCATCATGTACACGGATGCTC  
AGTTATCAGGATTATTGAAAGATGTCATTGACAATGGCATGCAGGAGACACTAAGATGGTT  
GAAGGAATCTCTCGAGGAGTCGCTCACCTGGCGTTGGTACCGTTGACCGCCGAGACCTCG  
TCGGCCTTGGAGACGGCGAGTCTCCAACGCCTTCTACGGGCGTTGGGCATCGAGCCAAACG  
CCGAGGAGTTTTATTGGCGAATACCCGCCTCTATGCTCGTTACTACCATTAAG

>Danaus\_plexippus

AGATTTGGTGGTACATATGTTGTTTCAGAATATGAAATCTATATCGGACAATGAGCTGATTT  
GTCTCCCTTTAAACAAGCTGGCCTTGAGAGCTTACAAGGAGCTGCTACACACATTAAGTGC  
CATGGACGCGAGCAAAGATCACACAGTCAGGGAATCCGCTAAAGTGTGAAAGAGTAATATA  
TTCTACGTACTGGAATATAGAGAGTTCATACTGTCCATGTATCTCAATTACGATGAAAATAA  
AATGTCATATCTAGTGGATCTCGTGAAACGGTCCACCTTTTCTTGAAATGTTAGAGCAT  
TACTGTAAGAGAACCGGTCTGGTTGTTTCAGAAGAAGGTTACAAAGGCCAAGATTGAACTCT  
CGTGGAAGAAATCCGCCCTCAGCTAGCCGCTGTGCTCAGTTATCTACCACGTTTTGACGC

GGCGTCAGAGACACCGATAGATCAACAGAAGGAAGATTGTATGAAGAAAATTCAAAGGCT  
GATGAGGGATCACAAGTACGAGGACGTCATAGGAACATTCAGAGCGGCCAGGGAAGTATGG  
CCGGAAGACGGTATCTTTGGTGTGACGCGGTATGCCGGAAGACGAGGAACTGGATATGTTAG  
AGACGATCTACAATACTGACTTGGGTAGATTCTGTCATCCGAAGATAGTATCGGCCTGTGTT  
TGTCTGTTAGAGCGTTACGACAAGAACCGGTCGCACACAAACCACTGTATAGTGAAGATGC  
TACACAGAATAGCGTTCGACTGCAACCGACCGGTATGATGTTTTCAAGCAACCTTATTCCTG  
ACTTTTCAGAAGATTCTGCACAATCATTTGAAGGAGTTGGAAAAGTTCGCCATATTTATTC  
TAAGAAAATTTCGCTGATATAGCGTCTAAGAGCGGGAAGTTTTTATTGAACTGTTATTTTG  
GAAGAATTCTAAAGACGCCGTTGAAATCGAACACGGATACAGCTGGTCCGAGGAACAAGAA  
GACGAACTACGTAACCTTTATATGGAGAATCAAACCAATCGAACACGTAGGTCGGTTATTA  
GAAGCTGAAGGAATTGGGGCTCATATTTAAAAGTCAGCTGAAGAACTGAGCGCTAATGA  
GATCGCAGAACTGTTAGTGCAAGCTGTTGAAAACGGTCACACGGAGGCCCTAAATTGGTTG  
TCTGAAAATCTAGAAGAAGTAGCTACCACGCCATTAGTACCGATATCAAGAGAATCCGTTCA  
AGCCATACAAGATGACTTATTTAGAAGAGTGCTAAAGAGTTTTGGGGATAGTACCGGACGAA  
CAAGAGACATATTGGAGAATACCGAGCAGCTTGCATTATGAAACTATAAGA

>Daphnia\_pulex

ATATTTTCGTGGAACCTTTCTGCGTGAAAGATGTCAAGTCGATCACTGACAAAGACCTAATCG  
TTCACACTTTGACTGATGTCGCTCTGTGTGCCCTACCAAGAGTTATTGATGACGCTCAACGC  
CATGGATAAATACGGCTCTGAATCCATCCGCAATTCGTCTCGAGTCCTTAAAAGCAACGTCT  
TTTATGTGCCAGAGTATCGTGAGATGTGCCTCGTTTTGCTCCTCAACTACAAAGAAAATCA  
ACACACTTACCTGAAAGATTTGGTTCGAAACCAATCACATCTTCTTGAAACTCTTTGAACAG  
TTCGCAAAGGGCAATCATCTGGTCGTCCAGAACAAGTCACAGAAGCGGAAGGAAGAAACG  
CCCTTCGACGAGATTGCCGTAGAGATCAGCTCGGCCTTACAAGACGTTGTTCCCTTTGACG  
CCGCCTCCGATCTCCCGATGGATGATCAAAGGGTTATAGCCATGGGAAAAATCGTGAAACT  
GCTGAAAGAATCCAAATCCCATCTGGCTGTGGCTCTACTGCGGGCTTGTGCTGAAGTTTGG  
CCGGAAGGGGAAGTCTTTGGTGTCTCTGAAGTGGGTCCAGAAGACGAGCTGCTTCTTTTAC  
GCGAACTCTATCATACCGAATTACCGAGATTCGCTCACAAAAACGTCGTCAAAAAGTTACTG  
CCATCTCTTGCGAAGTTACTCCACCAACACAACCTTTGACGAACCACTGCGTGATCAAAATT  
CTCCACCGGATCGCCTTTGATTGTAAAATGCCGGCCATGATTTTCCAGCTGTCCATTTTCAA  
GACATTCAAAAAATCATGGACGATGAAACTACTGAATTGTACAAGTTTGTATTTACATC  
ATGAGAAAATTTGCGGAAACGGCACAAGTCAACCCGAAAATCTTTGTGGAACGCTGTTTC  
TGGAAGACGGCCCGGAGGCGCCGAGATCGAAGTTGGTTACGGCTGGAGCGAAGAGGAA  
GAAGATGAATTGCAGCGGCTCCATCAAGAATTCAGAGACGTCGCGCAGTCGACGAGTCATCA  
TCAAGAAAATGAAAGAAATGGGTCTCATTATGGAAGGGGAAAGCGACCCTGTCAGCAAGA  
CGAAGGAGCTCAAGACTCAACATCGACCCAAACAGTACGGCCGTAAAGAAGGCTTAGCCTG  
GTTGGTCGAGTGTCTGAGTGAAACCCTCGATATCCCTATAGTCCCGCTCACGGACATTTCCA  
ACGACGCCATGGAGGACCACACCTTTTTGAAATTTATCGCCAAATGGGATTGGCTCCAAG  
CGAACAAAGAGCAATTCTGGCGTATCCCTTCCACATTGACTTCGGCTGATCTACGT

>Drosophila\_melanogaster

CGTTTTCGGCGGAACCTATGTCATTTCGGAACATGAAGTCCGTTTTCGGATCGGGATGTGATAT  
GCCACGCTCTGGAGCGCGTAGCGCTTTTGACATTCCGGGAATTGCTCCAAAGCCTGCTGGC

ACTGCAGAAGCTAAAGGATAACAACGCGCGAGCCCTTTTCGATATGTTATTGAACAACGTG  
TGCTATGTCTTGGAGTATCGGGAGACGGTGCTGCATTTGTTAATGAACTACAATGAGGCGC  
ACAGCGTTTTCTGCGCGATGTGGTGGAAACGGCCAACGTTTTTCATTAATAATGATGGAGCG  
CTTCTGCCAGGACTCTGTGCAAGACAAGAAGCGAGGTCGTCGAAAGAAGAAGGAGGAAGA  
ATTGTGGGCTGAACTGGCAACGGAAGTGTGCAGCCTGCTGTCCCAGCCCCTGCCCTTCGAT  
GCCGCATCCGAGAAATCCATTGATGATCAGCGCGAGGATTGCATGATTTCGCATAAATAAAC  
TGCTTCGTTCCGAGAACTGGACCAGGCCATCGCCCTTCTTCGTGCTGCCAGGGAAGTTTG  
GCCGGAGAACGAAGTGTTCGGTGCAATTTCCGCTGCACCGGAAGACGAGCTGCTGCTCCTG  
CGTGAGATTTTCATGTCCAACATTACAAGATTGCTGAATCCGAAAATCGTTCGGGCTTGCA  
CATTAGTGCTATCGGATTGGGCGGATATACCCACTCGATCTTTGAAAGCGGCCGTAACATT  
CTACATCGCATGCCTACGGCTGCAATGTGCGGGAATGCTTTTTTCAGGCCAAGCTGTTTC  
GCATCTTTCAACAAGTCTTCAGCGTGCATCAGGAGGAGCTGCGCCGCTGGCCATCTTTGT  
GGTGCGCAAATTTGTGCGAGGTAGCCCCGACTAATCCCAAATCTATGCAGAGTTATTATTTT  
ACAAAGGCATCAGGGAGGCAAATGAGCTGGAGTCGGGCTATGCCTGGACCGAGGAGCAGG  
AGTCGGAGCTACGCTCCTCTTCGAGGAGAACCAGCGCAATCGCAACCGCCGCACCGTCCT  
GAAGAAGCTGAAGGAAGTGGGCTGCTATTCAAGCGTCAGATGGTACCCTTGGATGTAGGC  
ACCATTAGAGCTTAATCGGTCAGGTGGATTCCGAAAAGTATCAATCGGCCATCGAGTGGC  
TGCAGGAATGCCTGCAAGACGCTAGCGATGTGCCTCTCCTGCCTCTAATGGAGAATCAAAA  
GAATGCCATGGAAGATGGTGATTTCCAAAAGTCTGGTTCGCCCTGGGCATGCAGCCATCG  
GGAATGGAAGCCTACTGGCGTATTCTATATATCTGAACTCAGCCGATTTGATA

>Heliconius\_melpomene

CGCTTTGGTGGCACATATGTCATACAAAACATGAAGTCTATATCAGATAATGAGTTAATATG  
TCTACCATTAAACAACTCGCTCTTAGAGCTTATAAGGAACTACTAAATACATTACTTGCCA  
TGGACAAAAGTAATGATACAATGGTTAAAGAGTCCGCTAAGGTGTTGAAAAGTAATATCTT  
CTATGTGTTGGAGTATAGGGAGTTTATTTTGAGTATATTTTGAATTATGATGAGAGTAAG  
ATGTCATATTTAGTAGATTTGATAGAAACAATTCATTTGTTCCTTAAAATGTTAGAGCACTA  
TTGTAAGAAAACAGGGTTGGTGGTCCAGAAAAAAGTTACCAAATCTAAAATACAAATATCG  
TGGGAAGAAGTTAGGCCTCAAATAGCCGCAGTAATGAATTACCCGCCGCCGTTTCGACGCAG  
CCTCTGACGTGCCTATTGATCAACAAAAGGAGATTGTATGAAGAAAATACAAAATTAAT  
GCGGGACCACAAATATGAAGATGCCGTCCGTACATTCCGAGCCGCGAGGGAAGTGTGGCCT  
GAAGAAGGTATATTTGGTGAAGCGATATCAAAGAAGATGAAGAAGTGGATATGCTCGAGA  
CTATTTATAACACGGACTTGGGAAGGTTCTGCCATCAGCGAGTAGTAAGCGCGTGTGTCTG  
TCTGTTAGAGCAATACCACAAGAACTTACCATACACAAACCATTGTATAATTAAGATGCTGC  
ACAGAGTCGCGTGGGACTGCAACCGACCCGCCATGATGTTTCAGGGCACGTTGTTCTTGAT  
ATTCCAAAGGGTGTGAATAATTTATTTAAGGAATTGGAAAAGTTCGCCATATTTGTTCTA  
AGGAAATTCGCTGAAATGGCATCGAGGAGTAGCAAAGTTTTTATCGAGCTGTTATTTTGA  
AGAATCTAAAGATTCTGTGGAATCGAACACGGTTACCAGTGGACTGAGGAACAGGAGG  
AGGAACTTCGGAACTTTACATGGAAAATCAAACCAACCGCACTCGTAGAAGTGTTATCAA  
AAAATTAAGAAGTACTAGGACTTATATTCAAAAGACAAACGAAAGAATTAAGTGCTAATGAA  
ATTGCGAAACTGTTGGTTCAAGCTGTTGATAATGAATTAACAGAAGCATTAATAATGGTTAG  
CGGAAAATCTAGAAGAAGTAGCCAATACTCCCATAGTCCGATATCTCAAGAATCCATCGAG

GCCATGGGGAAAAAGTTGTTTATTAAAGTGTTAAAAAGTATTGGAGTTGTACCAGATGAAC  
AGGAAACTTACTGGAGAATACCTAGTAACCTACATTTTGAAACTATACGC

>Harpegnathos\_saltator

CGATTTGGCGGTACTTATATTGTGCAAAATATGAAAGCCACCGGAGAAAATCAAATGATAT  
GTCACCCATAACCAGAAGGTAGCATTTAAAAGCATATCAGGAACTTCTTAATACTTTAATGGCA  
ATGGACAAGAGTGCAGATCACAGTGTTAGAGAGTCCAGCAAAATAATTTAAAAGTAACATCT  
TTTATGTTCCGGAATATCGTGAAACGATGCTGTGTCAATTTTTATATTACGATGAGAATAAG  
ATGCGCTACTTGGTGGATCTTGTGACTACTGTTTCATATATTTCTGAAAATGCTGGAATATTT  
CTGTGAGAAGGGTCATCTAATAGTTCAAAAAGTGAAGCAGAAGGTCAAGACTGCTACTTTG  
TGGGACACAGTTGGTCCCGAAATATCCGCTGTGATACAAGAGGTGATGCCGTTTGATGCAA  
CTTTAGAGACACCCATAGACGATCAGAAAGCAGACGCCATGAAGAGAATCCAGAAATTAAT  
GCGGCAGGAGAACTTGGAGCAGGCGTTGGTCTTCTACGTGCAGCAAGAGAGATCTGGCC  
TGAAAATGACTGCTTTGGTAGAGTGAACATACCCCCGGAGGAAGAGTTTCTGGCTTTACGT  
GAAATCTTCTTCGCAGACCTGGGCAGGTTTCGTAATGTAAAAGTGGTTAGAGCTTTGGCGC  
TACTACTGCAACAATTCGAGAGCAATACGGTCGAGGTAAACCACTATGTAGCCAAAATGTT  
ACATCGAATTGCTTGGACCTGCAAAATGCCGGCATGATATTCAGGCGTCCATCTTTCGG  
ACTTTTCAAAGAATCCTTGATTCAGCACACAAGGAGCTGCAAAAGTTCGCGGTCTTCATAA  
TCCGTCTGTTTCGTGGAAGTCGCCCAGAAAAACCGGAAGTCGTACATGGAGCTGCTCTTCTG  
GAAGACCAGCCGCGACGCGACAGAAATCGTGGATGGCTACGTCTGGACTGAGGCGGAAGA  
GGACGAGCTGCGTACCCTCTTCATGGAGCATCAGACTAACAGGACGCGGCGTACCGTCATC  
AAGAAGCTCAAAGAGATGTATCTGATCGTGAGGAAGCTACCGACGTTTACACGGATGCAC  
AATTATTCGGTCTCTTGAAGGACGTCATCGACAAGGACATGAAGGAGGCGTTGGAATGGAT  
CAAGGAATCCTTGCAAGATATCCTGAGCATAACCTTGGTGCCGCTGACAGATTATTCGTCTG  
GCCGCGATGGATTCGCCGAGTTTTCAAAGCTCCTTCGCGCCATGGGATTTGTACCAGATG  
CCCAAGAATCTTATTGGCGCGTCCCAGCGAATATGCTTACGAGCACGATTCAA

>Linepithema\_humile

CGATTTGGCGGTACTTATGTTGTGCAAAATATGAAAGCCATTGGAGAAAATCAAATGATAT  
GCCATCCATATCAAAAATTAGCGTTAAAAGCGTATCAGGAACTTCTTAACACTCTTATAGCA  
ATGGATAAAAGCACAGATGACGGTGTTAGGAAATCTAATAAAAATAATCAAAGCAATATTT  
TTTACGTTCCGGAATATCGGGAAACAATATTCTCTCAGCTTTTATGCTTCGATGAAACTAA  
AATGTTATACTTAGTAGATCTAGTGACGACTGCTCACATATTTCTGAAAATGCTTGAGCATT  
TTTGCCAAAAAGGCCATCTCATAGTTCAAAAAGTGAAGCAAAAAGCTAAGCTTCCTACGTT  
GTGGGACGCTACCGTCCCTGAATTATCTGCTGTAATGCGAGAAATGATACCGTTTCGATGCA  
ACTTTAGACACGTCGATTGACGATCAGAAAACGGACGCCATGAAGAGAATCCAGAAATTC  
TGCGGCGGAAGAACTTGAACAGGCGGTGGGTCTTACGTGCAGCAAGAGAAATCTGGC  
CTGAGAACGATTGCTTCGGAAGAGCGGATATATCGCCGAGGAGGAATTTTAGCTCTTCG  
CGAAATCTTCTTTGCAGACCTGGGCAGGTTTGCCAACGTGAAGATCGTCAAAGCTTTAGCA  
CTGTTACTACGAGAGTTCGAGAATAATACGATCGAAATAAATCACTACGCAACAAAAATGC  
TGCACCGGATTGCTTGGGATTGCAAAATGCCGGGCATGATATTCGAAGCATCCATATTTTCG  
GATTTTTCAAAGAGCTCTCGAGTCAGCGCATAAGGAGCTCCAAAAGTTCGCGGTCTTCATA  
ATCCGCGTTTCACCGAAGTCGCCCAGAAGAACCGGAAGTCGTACATGGAGCTGCTCTTCT

GGAAGACCACCCGCGACGCGACAGAAATCGTAGATGGATACGTCTGGACGGAGGCGGAAGA  
GGACGAGCTGCGTACTCTCTTCATGGAACATCAGACTAACAGAACGCGCCGTACCGTCATT  
AAGAACTCAAGGAAATGTGTTTATTGATTGTCCGGAAGCTAGCGACGGTTTACACGGATGCAC  
AATTATCTGGTCTCTTGAAGGACGTCATCGACAGGGATATGAGAGAGGCGCTGGAATGGAT  
CAAGGAATCTCTGCAAGACGTTCTGAGCATAACCCTTGGTGCCACTGACAGATTACTCGGCG  
ACCGGATGGATTACCGAGTTTTCAAAGCTCCTCCGCGCCCTGGGATTTGTGCCAGATG  
CCCAGGAATCTTATTGGCGTATTCGGCGAATATGCTTACAATCACGATCCAG

>Megachile\_rotundata

CATTTTGGCGGCACGTACGTCCAGAATATGAAAGCTATCGGAGACAATCAGCTGTTAT  
GTCACCCCTATCAGAAGATAGCATTAAAAGCTTACCAGGAACTTTTGCACACTCTGATAGC  
GATGGATCAAAGCAAGGACCGTGGTGTTCGCGAATCCAGCAAAGTTATCAAAGCAACGTG  
TTCTATGTACAAGAATATCGAGAAACGGTGCTCTCGCAACTGCTTTGTTTCGACGAGATCA  
AATGCAATATTTGATTGATCTACTAACGACAGCGCATATCTTTCTGAAAATGCTGGGCCA  
TCACTGTGGACACAATAGTGTGATTGTTCAACAAGTGAAGCACAAGAGTGGACCTCGAAGT  
TTGTGGGACGAAATTAGTCCACAATTGTCAATCGTAATGCGAGAAGTTGTGCCATTTGATG  
CGACCTTGATACACCTATAGAAGATCAAAAAGTCCGATGCTATGAAGAAAATACAGAAGTT  
GTTGCGATCGAAATCTTTGGAACAAGCAGTTGGCCTTCTTCGTGCAGCAAGGGAAGTTTG  
GACCGAAAACGACTGCTTCGGCAAAGCTGATATTACGCAAGAGGAGGAGTTCCTAGCACTG  
CGGGACATTTTCGTTGCAGACCTGGGCAGATTTGCCAACGTGAAAGTTGTTAGAGCTTTGC  
TGATCTTGCTACGACAATTTGATAAGAACACTGATGAAGTAAACCATTACGTTAACAAGAT  
GCTTCATCGAATTGCTTGGGATTGTAAAATGCCTGGAATGATGTTTCAAGCATCGATGTTT  
CGTGTTCAGAGAATACTTGAGTCTGCTCATAAGGAACTTCAGAAGTTTTCGATCTTCA  
TAATTCGCCGCTTTATCGAAGTCGCGCAGAAAACCGGAAAGCGTACATGGAGCTGCTTTT  
TTGGAAGACCACTCGAGATGCGGCTGAAGTCGTTGACGGTTATTTCTGGACCGAGGCCAA  
GAGGACGAGTTACGCACCCTCTTTATGGAACATCAGACTAACCGAACACGACGTGGCATCA  
TAAAAAACTGAAAGAATTGTGTTTATCGTCAAGAAGCAGCCAACTGTCTACACGAATGC  
ACAATTATCTGGGCTGTTGAAGGATATTATCGAAAAAGATATGAACGAAGCACTTGAATGG  
CTGAAGGAATCCTTACTGGATGTTCTGAGCATCCCTTTAGTCCCTCTGACAGATTATTCTGTC  
AGCCGCGATGGATTACCGAGCTTTCAAAGCTTATTCGAGCTATGGGATTCACACCTGAT  
GAACAGGAATGTTATTGGCGCATACCATCTAATATGCTTAATTTCGACGATTCAG

>Nasonia\_giraulti

AGGTTCCGGTGGTACCTACGTGCGTGCAGAATATGAAGGCGATCGGGGACAACGAGATGATCT  
GCCACCCTTATCAGAAATTGGGTATCAACGCCTATCAGGAGTTGCTGCTTACTTTGATCGA  
AATGGACAAGAGCAAAGATGACGGAGTGAACGATCCAGCCGCGCCATAATGGGAAATATC  
TTCTACGTGCCAGAGTACCGCGACACGATACTCTCCAGCTACTCAACTACAACGAGTTAAC  
AATGGATTACTTGGTGGATCTCGTAACTACCGTACACATCTTCTTGAAGATGTTGAAGAAC  
TTTTGCGAGAAGGAGAACGTTGTCGTACAGAAAGTGA AAAAAGAAGCCGAAGCTGCCAAGC  
CTGTGGGACGACGTGGGGCCGGAAGTATCGGCCGTTATGCAGGTAGTGGCACCTTTCGACG  
GTGCAAGCGAGATTC CATAGACGATCAGAAGGGCGACGCGATGAAGAGGATCCAGAAGCT  
GCTGCGCTGCAAGGACTACGAGCAGGCGATCGGACTTCTGCGCTCGGCAAGGGAAGTCTGG  
CCGGAGAACGACAGCTTCGGCAAAGCCAACCTATCCGTGGAAGAAGAGTTCTGTTGCTGC

GGGAGATCTTCTTCGCCGAGCTCGGTTCGATTCGCAAACCTTGAGGGTGGTGAGCAACCTGGC  
CATCCTCCTGAAGAACTTCGAGAGGAACACACCGGAGCTCAACCACTACGTTCTCAAATG  
TTCCACCGGATTGCCCTGGACTGCAAAATGCCCGCTATGCTGTACCAGGCTTCTATATTCCG  
CGTCTTCCAGAGGGTCTTCCAGTCCGTTACAAGGAATTAGCGTCGTTCCGCGCGCTTGTG  
TTCCGCGGCTTCGTGGAAGTGGCTTCGCGCAATCCAAGGCCTACATGGAGCTGCTGTTCT  
GGAAGTCGACGAAACAGGCGACGGAGATGGTGGACGGCTACGCCTGGTCCGAGGAGGAGG  
AGGACGAGCTGCGGACCCTCTTTATGGAGCATCAAACAAACCGCACGAGGCGAGGAGTCAT  
GAAGAAGCTCAAAGAGATGTACCTCATCGTCTCAAACAGCCGGCGGTTTACACCGACGCT  
CAGCTATTCGGATTATTGAAGGACGTCATCGCTAACTTGCAAGAGGCGTTGCAGTGGC  
TTAAGGAGTCACTGGAAGAGTCCCTGAGCTTGGCGCTCGTGCCGCTAACCGCTGAGACGTC  
AGCTGCGATGGACTCACCGAACTTCCAGCGCTTCTTAGAGGCGCCGGCATTGAGCCAGAT  
CTCGAGGAGGCTTATTGGCGCATACCCGCGAGTATGCTGGTGACTIONACCGTCAA

>Nasonia\_longicornis

AGGTTCCGGTGGTACCTACGTCGTGCAGAAATATGAAGGCGATCGGGGACAACGAGATGATCT  
GTCACCCTTATCAGAAATTGGGTATCAACGCCTATCAGGAGTTGCTGCTTACTTTGATCGA  
AATGGACAAGAGCAAAGATGACGGAGTGAAACGATCCAGCCGCGCCATAATGGGAAATATC  
TTCTACGTGCCAGAGTACCGGACACGATACTCTCCAGCTACTCAACTACAACGAGTTAAC  
AATGGATTACTTGGTGGATCTCGTAACTACCGTACACATCTTCTTGAAGATGTTGAAGAAC  
TTTTGCGAGAAGGAGAACGTTGTCGTACAGAAAGTGAAAAAGAAGCCGAAGCTGCCAAGC  
CTGTGGGACGACGTGGGGCCGGAAGTATCGGCCGTTATGCAGGTAGTGGCACCTTTCGACG  
GTGCAAGCGAGATTTCCATAGACGATCAGAAGGGCGACGCGATGAAGAGGATCCAGAAGCT  
GCTGCGCTGCAAGGACTACGAGCAGGCGATCGGACTTCTGCGCTCGGCAAGGGAAGTCTGG  
CCGAGAACGACAGCTTCCGCAAAGCCAACCTATCCGTGGAAGAGGAGTTCTCTGGTGTGCTG  
GGGAGATCTTCTTCGCCGAGCTCGGTTCGATTCGCAAACCTTGAGGGTTCGTGAGCAACCTGGC  
CATCCTCCTGAAGAACTTCGAGAGGAACACACCGGAGCTCAACCACTACGTTCTCAAATG  
TTCCACCGGATTGCCCTGGACTGCAAAATGCCCGCTATGCTGTACCAAGCTTCGATATTCCG  
CGTCTTCAAAGGGTCTTCCAGTCCGTTACAAGGAATTAGCGTCGTTCCGCGCGCTTCGTG  
TTCCGCGGCTTCGCGGAAGTGGCTTCGCGCAATCCAAGGCCTACATGGAGCTGCTGTTCT  
GGAAGTCGACGAAACAGGCGACGGAATGGTGGACGGCTACGCCTGGTCCGAGGAGGAGG  
AGGACGAGCTGCGGACCCTCTTTATGGAGCATCAAACAAACCGCACGAGGCGAGGAGTCAT  
GAAGAAGCTCAAAGAGATGTACCTCATCGTCTCAAACAGCCGGCGGTTTACACCGACGCT  
CAGCTATTCGGATTATTGAAGGACGTCATCGCTATCACTTGCAAGAGGCGTTGCAGTGGC  
TTAAGGAGTCACTGGAAGAGTCCCTGAGCTTGGCGCTCGTGCCGCTAACCGCTGAGACGTC  
AGCTGCGATGGACTCACCGAACTTCCAGCGCTTCTTAGAGGCGCCGGCATTGAGCCGGAT  
CTCGAGGAGGCTTATTGGCGCATACCTGCGAGTATGCTGGCGACTACCGTCAA

>Nasonia\_vitripennis

AGGTTCCGAGGTACCTACGTCGTGCAGAACATGAAGGCGATCGGGGACAACGAGATGATCT  
GCCACCCTTATCAGAAATTGGGTATCAACGCCTATCAGGAGTTGCTGCTTACTTTGATCGA  
AATGGACAAGAGCAAAGATGACGGAGTGAAACGATCCAGCCGCGCCATAATGGGAAATATC  
TTCTACGTGCCAGAGTACCGTGACACGATACTCTCCAGCTACTGAACTACAACGAGTTAAC  
AATGGATTACTTGGTGGATCTCGTAACTACCGTACACATCTTCTTGAAGATGTTGAAGAAC

TTTTGCGAGAAGGAGAACGTTGTCGTACAGAAAGTGAAAAAGAAGCCGAAGCTGCCAAGC  
CTGTGGGACGACGTGGGGCCGAAGTATCGGCCGTTATGCAGGTAGTGGCACCTTTCGACG  
GTGCAAGCGAGGTTCCCATAGACGATCAGAAGGGCGACGCGATGAAGAGGATCCAGAAGCT  
GCTGCGCTGCAAGGACTACGAGCAGGCGATCGGACTTCTGCGCTCGGCAAGGGAAGTCTGG  
CCGGAGAACGACAGCTTCGGCAAAGCCAACCTATCCGTGGAGGAGGAGTTCCTGGTGCTGC  
GGGAGATCTTCTTCGCCGAGCTCGGTTCGAACTTGAGGGTTCGTGAGCAACCTGGC  
CATCCTCCTGAAGAACTTCGAGAGGAACACACCCGAGCTCAACCACTACGTTCTCAAATG  
TTCCACCGGATTGCCCTGGACTGCAAAATGCCCGCTATGCTGTACCAGGCTTCGATATTCG  
CGTCTTCAGAGGGTCTTCCAATCCGTTCAACAAGGAATTAGCGTCGTTTCGCGCGCTTCGTG  
TTCCGGGGCTTCGCGGAAGTGGCTTCGCGCAATCCAAGGCCTACATGGAGCTGCTGTTCT  
GGAAGTCGACGAAACAGGCGACGGAGATGGTGGATGGCTACGCCTGGTCCGAGGAGGAGG  
AGGATGAGCTGCGGACCCTCTTTATGGAGCATCAAACCAACCGCACGAGGCGAGGAGTCAT  
GAAGAAGCTCAAAGAGATGTACCTCATCGTCTCAAACAGCCGGCGGTTTACACCGACGCT  
CAGCTATCGGGATTATTGAAGGACGTCATCGCTAACAACCTTGCAAGAAGCGTTGCAGTGGC  
TTAAGGAGTCACTGGAAGAGTCCCTGAGCTTGGCGCTCGTGCCGCTAACCGCTGAGACGTC  
AGCTGCGATGGACTCGCCGAACCTCCAGCGCTTCTTAGAGGGCGCCGGCATTGAACCGGAT  
CTCGAGGAGGCTTATTGGCGCATACCCGCGAGTATGCTGGTGACTACCGTCAAA

>Pogonomyrmex\_barbatus

CGATTCGGCGGCACTTACGTTGTACAAAATATGAAAGCTACTGGAGAAAATCAAATGATAT  
GTCACCCATATAAAAAATTGGCATTGAAAGCATATCAGGAGCTTCTTAACACTCTTATGGC  
AATGGATAAGAGTAAAGATGATGGTGTAGGGAATCCTGCAAGATAATTAAGCAATATC  
TTTTACGTCCCGAATATCGGGAAACGATATTCTCTCAGCTTTTGTGCTTCGACGAGTTA  
AAATGCAGTACTTAAGAGATCTTATAACGACTGCTCACATATTTTTAAAAATGCTGGAACA  
TTTCTGTGCAAGAGCCATCTCATAGTTTGTAATAAAGAGAAAGGCTAAGGCTCCTACC  
TTGTGGGACATTATTGGTCTGAATTATCTGCTGTTATGCGCGTAGTGATGCCATTTGGTGC  
AACCTTAGATACACCTATCGACGATCAAAAAGCGGACGCCATGAAGAGAATCCAGAAATTA  
ATGCGACAGAGAACTTGGAACAGGCACTCGGCCTCCTACGTGCAGCAAGAGAAATCTGGC  
CCGAAAATGACTGCTTCGGAAAAGCGGACATGCTTCCCAGGAAGAATTTCTAGCCCTTCG  
CGAAATCTTCTTTGCGGATCTGGGCAGGTTTGCTAATGTGAAGATTGTCAAGGCTTTAGCA  
CTACTACTGCAACAATTTGAGACCAATACAGTCGAAACAAATCACTACATAATAAAAAATGTT  
ACATCGGATTGCTTGGGATTGTAAAATGCCTGGTATGATATTCOAAGCGTCCATATTTCCGA  
TTTTTCAACGAATTCTCGACTCAACACATAAGGAGCTCCAAAAGTTTCGCGGTCTTCATAAT  
CCGCCGTTTCATCGAAGTCGCTCAGAAAAACCGGAAGTCGTACATGGAGCTGCTCTTCTGG  
AAGACCACCCGCGACGCGACAGAAATCGTGGATGGCTACACCTGGACGGAGGCGGAGGAGG  
ATGAGCTGCGCACCCCTTTCATGGAGCATCAGACTAACAGAACGCGACGTACCATCATCAA  
GAAACTCAAAGAGATGTGTTTGAATTGTCCGAAAGCTACCGACGGTTTACACGGATGCACAA  
TTATTCGGTCTCGTGAAGGACGTCATCGACAGGGATATGAGAGAAGCGTTGGAATGGATCA  
AGGAATCCCTGCAAGATGTTCTGAGCATAACCTTGGTGGCGTTGACAGATTACTCGTCAGC  
CGCGATGGATTACCGAGTTTCAAAGCTGCTTCGCGCCCTGGGATTTGTGCCAGATGCC  
CAAGAATCTTATTGGCGTATCCCGCGAATATGCTTACAATCACGATACAA

>Solenopsis\_invicta

CGATTCGGTGGTACTTACGTTGTGCAGAATATGAAAGCTACTGGAGAAAATCAAATGATAT  
GCCATCCATAACCAGAAGTTGGCATTAAAGGCATATCAGGAGCTTCTTAACAATCTCATGGTA  
ATGGAGAAGAGTAGAGATGATGGTGTTAGAGAATCCAGCAAGATAATTTAAAGCAATATCT  
TTTATGTCCCGGAATATCGGGAAACTATACTCTCTCAGCTTTTGTGCTTCGACGAGGTAA  
AATGCAGTACTTGGTGGATCTTGTAACGACTGTTACATATTTCTAAAGATGCTTGAACAA  
TTCTGCCAGAAAAATCATCTCGTAGTTCAAAAAGCAAAGACAAAGACCAAAGCTCCTACTT  
TGTGGGACACTATTGGCCCCGAATTATCTGCAGTTATGCGCGTAATGGTGCCATTTGATGCA  
ACCTTAGATACGCCTATTGATGATCAAAAAGCGGACGCCATGAAGAGAATTCAGAAATTAA  
TGCGACAACGGAACCTTGGAACAGGCAGTTGGTCTTCTACGTGCAGCAAGAGACATTTGGCC  
AGAGAATGATTGCTTCGGAAAAGTGGACATACTTCCCGAGGAAGAATTTCTAGCTCTTAC  
GAAATCTTCTTTGCTGAGCTGGGCAGTTTGCCAACGTGAAGGTCGTCAAGGCTTTAGCAC  
TTTTAATGCAACAATTCGAAAGCAACTCGATCGAAGTAAACCACTATGTAGCAAAAATGCT  
ACATCGTATCGCTTGGAAATTGTAAAATGCCGGGCATGATATTTCAAGCATCCATCTTTCCGA  
TTTTTCAAAAATCCTTGAGTCAGAACACAAGGAGCTCCAAAAGTTCGCGGTCTTCATAAT  
CCGCCGTTTCATCGAAGTCGCCCAGAAGAACCGGAAGTCGTACATGGAGCTGCTCTTCTGG  
AAGACTACCCGCGACGCGACAGAAATCGTGGATGGCTACACCTGGACGGAGGCGGAAGAGG  
ACGAGCTGCGTACTCTTTCATGGAGCATCAGACTAACCGAACACGACGCACCATCATCAA  
GAAACTCAAGGAGATGTGCCTGATCGTCCGGAAGCTACCGACGGTTTACACGGATGCACAA  
TTATCCGGTCTCTTGAAGGACGTCATCGACAGAGACATGAGAGAGGCATTTGGAATGGCTCA  
AGGAATCCCTGCAAGACGCTGTGAGCATAACCTTGGTGCCGCTGACAGATTACTCGTCTGT  
TGCGATGGATTACCCGAGTTTTCAAAAAGCTCCTTTCGCGCCATGGGATTTGTGCCAGATGCC  
CAGGAATCTTATTGGCGTATCCCGGCGAATATACTTACGGCTACGCTCCAG

>Tribolium\_castaneum

AGATTTGGCGGCACATACGTCCATAAATCAATGAAATCAATTAGCGACAACGAACTTATTT  
ATCACCCGTTAAATAAACTGGCCCTTCTCGCCTACAGAGAGTTGTTTCTAACCTTTGTGCG  
ATGGATAAATCCCCGGACGAGACGGTGCGCGATTACAGCTCGCGTGATAAAAAGTAACATAT  
TCTACATAGTGGAGTATCGCGAATTCGTGATAACTTTATTAATGACTTACGACGAATTTAAA  
ATGGCGTATCTGAAGGATCTCATGGAGACCCAGCATGTTTTTCATCAAGTTGTTGGAGAGTT  
TTTGGCGCTCGAACGTTGTGCTACAGAAGAACTGAAAAGGAAGAAAAAGATGTAAATT  
TATGGGATGAAGCCGCCACAGCTGTCCACCGTTCTCGAAGACGTCGTTCCGTTTTGATGC  
CGCCTCCGACGTTCCCATAGACGAACAAAAAGCCGAAGCTATGAAAAACGTCCAGAGGAAG  
CTGCGAAACGCCGACTACGAAAATGCAATCAGTCTCTTGGCGGCTGCAAGAGAAGTCTGGC  
CCGAAAATAATTGCTTTGGGAGCAACAATATGGCACCCGAGGAGGAATTTTGGCACTCCG  
CGACATTTTCTTTCGCGGATTTAGGTCGCTTGGCTCACCTCGAATAGTGCAGCGTGTGGC  
CTAGCTTTGCGCGACTTTGAGTCAAATTCGGTGAACACAAATCACTGCATCATTAAGTTGC  
TCCATCGCATCGCTTTCGATTGTAAACTGTACGTAATGATTTTTCAAGTATCAATTTTCCGG  
ACTTTTCAGAAGATTTATGCCAATCAATATCGTGAACCTTGTGAAGTTTGGGACTTATATTA  
TTCGGCAATTTATAAAAATTACGGAGATTAATAAGAAAGTTTATATGGAAAGTTTGTCTT  
CAAGAATACGAATGAGGCGTACGAGATCGAGCATGGATATGGCTGGACCGAGGAGGAGGAG  
GACGAACTCCGGCGTTTATTCATGGAACACCAAACGAATCGAACTCGTTCGCGCCGTTATGA  
AAAACTCAAAGATATGTGTCTGCTCGTACGCGTCAAGTAAATATGGCATCGGATGCCCCG



GATTGCCGCACTTTTTATTAACTTGTCGAGTCAGGGATGAGTGAAGCGTTAGAATGGCTC  
AAAGACAGTTTTTCCGACGCTGTTGGAATTCATTAGTCCAATAATGGATTATGCAGTTA  
ATGCTATGGAAAATGCTGATTTATTGAAACGCTCAAAGCTCTCGGCGTGGCTGAGGACGA  
ACAGGAAATGTACTGGCGAATTCGGGCAACTTATCAGTCGATGTGATAAGA
